# Supplementary material for: Dynamic control of Hsf1 during heat shock by a chaperone switch and phosphorylation
Source: eLife. 2016 Nov 10;5:e18638. doi: 10.7554/eLife.18638 (PMC5127643; doi:10.7554/eLife.18638)
Supplement: Figure 1—source data 1. — DOI: http://dx.doi.org/10.7554/eLife.18638.004 [file elife-18638-fig1-data1.xlsx]

## Sheet: Samples Report With Clusters fo
Figurer 1 source data - mass spec peptide counts
Hsf1-3xFLAG-V5 IP/MS rep 1	Displaying:Total Spectrum Count
Identified Proteins	untagged	basal (HS 0min)	HS 5min	HS 30min	HS 1hr	HS 2hr
HSF1	0	19	11	25	23	23
Cluster of SSA2	0	9	0	11	9	6
RPA34	0	9	0	0	0	0
RPL4A	0	8	0	0	0	5
RPS3	0	6	0	6	0	0
RPS17B	0	5	0	0	0	0
RSP5	0	0	0	0	6	0
RPS4B	0	0	0	5	6	0
RPS18A	0	0	0	0	0	6
KSP1	0	0	0	0	0	5
IST2	0	0	0	0	6	0
Cluster of YEF3	7	6	0	7	0	7
PDC1	9	10	9	0	6	6
Cluster of TDH3	14	18	11	21	10	21
PFK26	19	20	14	28	5	31
LEU1	22	0	0	0	0	0
TEF2	44	26	27	32	137	35
Hsf1-3xFLAG-V5 IP/MS rep 2	Displaying:Total Spectrum Count
Identified Proteins	untagged	basal (HS 0min)	HS 5 min	HS 15 min	HS 30min	HS 1hr	HS 2hr
Cluster of SSA2	0	27	2	35	29	21	20
HSF1	0	15	15	24	19	24	27
Cluster of YEF3	0	9	11	17	20	5	4
RPS3	0	12	11	14	13	5	0
Cluster of ENO1	0	3	3	7	5	2	15
Cluster of RPS7A	0	9	5	9	8	5	5
RPL4B	0	9	6	8	12	6	2
ALD6	0	7	8	4	12	4	2
RPL20A	0	4	6	5	6	2	0
RPS4B	0	4	3	6	7	6	2
CDC19	0	3	3	5	13	4	0
RPL7A	0	2	3	4	7	3	0
RPL19B	0	5	5	6	4	4	3
RPS2	0	2	4	5	5	0	2
RPL17A	0	5	4	6	5	4	3
MBF1	0	3	3	4	3	4	5
RPL26B	0	5	4	4	5	2	0
RTF1	0	4	4	5	4	2	0
RPL10	0	3	0	3	5	2	0
Cluster of RPL8A	0	4	0	5	0	0	0
RPS17B	0	4	3	3	6	2	2
RPS14B	0	4	3	3	4	3	3
RPS1B	0	3	0	2	2	3	0
RPL6A	0	3	2	6	4	2	2
RPL25	0	4	4	3	5	3	0
RPL35B	0	4	3	4	4	4	2
RPS24A	0	3	2	4	5	0	0
RPL14B	0	0	4	4	5	0	0
RPL1B	0	0	0	4	5	3	0
RPL31A	0	3	3	5	3	2	0
RPL12B	0	2	2	4	4	2	0
RPL32	0	4	0	4	4	2	0
RPL18B	0	2	3	4	3	0	0
RPS8A	0	2	2	3	2	2	0
RPL11A	0	3	4	3	3	2	0
Cluster of RPL21A	0	2	2	5	5	2	0
RPL2A	0	2	2	3	4	0	0
RPS9B	0	0	2	4	3	0	0
RPS13	0	3	2	3	0	0	0
RPS20	0	8	3	2	2	0	0
Cluster of YDR261C-D	0	0	2	0	2	3	2
RPS26A	0	3	0	3	2	0	0
RPL16B	0	5	4	4	4	0	0
RPL3	0	3	0	2	2	3	0
RPL5	0	0	2	3	3	2	0
PET9	0	0	0	0	4	0	0
FET4	0	0	0	3	0	0	0
RPS11B	0	0	0	3	0	0	0
RPL43B	0	0	0	2	3	0	0
RPS22A	0	2	2	0	3	2	0
RPL9A	0	2	0	0	3	0	0
RPS15	0	0	0	2	0	0	0
PMA1	0	2	0	3	4	0	0
RPL28	0	0	0	3	3	2	0
RPL27B	0	2	2	3	3	0	0
RPL15A	0	0	0	2	3	0	0
HTB2	0	0	2	0	0	0	2
RPS29B	0	5	3	3	3	3	4
RPS19B	0	2	0	0	3	0	0
RPS21B	0	2	0	2	3	0	0
KSP1	0	0	0	0	0	2	0
RPL16A	0	2	2	4	4	0	0
RPL36B	0	2	0	0	0	0	0
RPL23A	0	2	0	0	0	0	0
BFR1	0	0	0	2	0	0	0
SIP1	0	0	0	2	0	2	0
RPL34A	0	2	0	0	0	0	0
NSR1	0	0	2	0	0	0	0
Cluster of keratin 31	0	3	0	0	0	0	0
SRO9	0	0	0	2	0	0	0
RPS30A	0	2	0	0	0	0	0
RPL38	0	2	0	0	0	0	0
CPR1	0	2	0	0	0	0	0
NOP56	0	0	0	2	0	0	0
Cluster of DED1	2	13	5	12	10	8	6
SSB1	2	9	8	6	7	2	0
FBA1	2	9	7	5	6	4	2
RPS18A	2	5	5	6	7	4	4
RPL13B	2	5	4	4	4	5	4
Cluster of ADH1	2	5	5	8	7	4	2
RPS0B	2	5	4	4	5	2	0
RPS29A	2	8	6	4	4	4	4
RPS5	3	4	4	5	3	3	3
Cluster of PDC1	4	10	18	21	26	13	9
PFK26	5	24	19	29	23	28	29
RPS16B	5	6	5	6	3	4	3
ACT1	5	3	3	2	4	2	0
STM1	8	22	33	10	21	11	24
RPA34	9	9	7	8	7	7	6
TEF2	11	34	30	48	54	58	37
LEU1	14	0	0	0	0	0	0
Cluster of TDH3	15	26	28	32	42	27	22
Hsf1-3xFLAG-V5 IP/MS rep 3	Displaying:Total Spectrum Count
Identified Proteins	untagged	basal (HS 0min)	HS 5min	HS 15min	HS 30min	HS 1hr	HS 2hr
HSF1	0	38	35	38	41	61	54
Cluster of SSA2	0	15	0	20	12	18	11
MBF1	0	4	3	5	7	6	6
RPL3	0	4	0	0	20	0	0
Cluster of YEF3	0	10	0	0	3	0	3
RPS4B	0	3	0	0	15	0	0
RPS3	0	7	0	3	13	0	3
RPL10	0	3	0	0	11	0	0
Cluster of RPS29A	0	5	3	5	5	0	3
RPS5	0	3	2	5	5	2	3
RPS15	0	4	0	2	7	2	0
RPS18A	0	2	0	0	10	0	0
RPS17B	0	0	2	0	9	2	0
Cluster of RPS1B	0	0	0	0	16	0	0
RPL9A	0	3	0	0	6	3	0
RPL4A	0	4	0	2	8	0	0
HTB2	0	0	0	4	0	2	5
RPS11B	0	0	0	0	8	0	0
Cluster of RPL21B	0	0	0	0	9	0	0
RPS8A	0	0	0	0	11	0	0
RPS6B	0	0	0	0	7	0	0
RPL2A	0	3	0	0	2	0	0
RPS2	0	3	0	0	7	0	0
Cluster of RPL31A	0	4	0	0	4	0	0
RPL19B	0	3	0	0	4	0	0
RPL35B	0	2	2	2	6	0	0
RPL17A	0	2	0	3	5	0	0
RPL11B	0	3	2	0	3	0	2
RPL15A	0	3	0	0	0	0	0
RPS24A	0	2	0	0	7	0	0
RPS7A	0	5	2	0	3	0	0
RPL28	0	0	0	0	3	0	0
FET4	0	0	0	2	0	0	0
RPL20A	0	0	0	0	2	0	0
Cluster of YJR027W	0	2	0	0	0	0	0
RPS25A	0	0	0	0	6	0	0
RPL26A	0	2	0	0	4	0	0
RPL5	0	3	0	0	0	0	0
RPL27B	0	2	0	0	2	0	0
RPL7B	0	4	0	0	0	0	0
Cluster of RPL16B	0	0	0	0	4	0	0
RPS9B	0	4	0	0	0	0	0
RPL24B	0	0	0	0	5	0	0
RPS0A	0	4	0	0	0	0	0
RPS22A	0	0	0	0	2	0	0
RPL32	0	0	0	0	4	0	0
RPS13	0	0	0	0	3	0	0
RPS7B	0	2	0	0	4	0	0
PMA1	0	3	0	0	0	0	0
RPL23A	0	0	0	0	3	0	0
CDC19	0	0	0	0	2	0	0
ATP2	0	0	0	2	0	0	0
LSP1	0	0	0	0	0	0	2
RPL25	0	2	0	0	0	0	0
Cluster of PDC1	2	11	0	5	6	0	10
RPS14B	2	2	2	3	9	2	0
HHF1	2	0	2	6	0	2	6
ADH1	2	2	0	0	2	2	0
RPS30A	2	2	2	0	0	2	0
RTF1	2	2	0	0	0	0	0
RPA34	3	5	5	3	4	0	0
RPS16B	3	3	5	3	5	3	2
LEU1	3	0	0	0	0	0	0
TEF2	8	15	13	14	17	21	20
Cluster of TDH3	10	18	7	12	11	13	18
PFK26	29	6	0	8	8	13	14
YFP-3xFLAG-V5 IP/MS	Displaying:Total Spectrum Count
Identified Proteins	Rep1	Rep2
TEF2	19	30
Cluster of TDH3	18	31
CDC19	14	23
RPL12B	13	17
Cluster of YEF3	5	16
Cluster of RPS7A	4	8
LEU1	2	15
RPL20A	5	6
RPS14A	3	7
RPS3	4	5
Cluster of RPL17A	4	5
Cluster of RPS9B	0	4
RPL26B	4	6
Cluster of RPL13B	6	6
RPL7A	0	5
PDC1	6	9
RPS4B	0	7
RPL4A	3	8
RPS18A	3	6
Cluster of RPS1B	0	7
RPS5	3	5
RPL10	0	5
RPS6B	0	6
Cluster of RPS29A	4	5
Cluster of RPL16B	4	5
RPS17B	2	5
RPS22A	2	4
SSB1	0	3
RPL35B	3	5
RPS13	2	3
RPL9A	0	3
RPL3	0	3
RPL32	2	4
RPS11B	0	5
RPS16B	2	4
Cluster of RPS26A	2	3
RPL8B	0	6
RPL31A	2	3
RPL27B	0	3
RPS24A	0	5
