# Supplementary material for: Dynamic control of Hsf1 during heat shock by a chaperone switch and phosphorylation
Source: eLife. 2016 Nov 10;5:e18638. doi: 10.7554/eLife.18638 (PMC5127643; doi:10.7554/eLife.18638)
Supplement: Figure 2—source data 1. — DOI: http://dx.doi.org/10.7554/eLife.18638.008 [file elife-18638-fig2-data1.xlsx]

## Sheet: Sheet1
Figure 2 source data - decoy mass spec
		Hsf1-3xFLAG-V5
Identified Protein	decoy-3xFLAG-V5	– decoy	"+ decoy"
HSF1	0	50	67
decoy: hNTA-mKate-hCTA	110	0	0
Cluster of SSA2	31	35	3
PFK26	16	60	8
TEF2	56	50	33
Cluster of TDH3	20	20	0
RPA34	16	19	0
FET4	12	16	0
KSP1	15	14	2
RPS14A	7	11	2
Cluster of RPS7B	12	10	0
RTF1	5	9	0
RPL1B	6	9	2
Cluster of RPL6A	7	8	2
RPS18A	6	8	5
PAD1	4	8	0
Cluster of YEF3	12	7	0
RPS4B	8	7	3
CDC19	10	6	5
Cluster of RPL26B	5	6	0
SSB1	10	6	0
Cluster of RPL8B	6	6	0
RPS9B	4	6	0
CTR9	0	6	2
RPL7B	5	5	0
RPL14B	4	5	0
RPS13	4	5	2
Cluster of DED1	3	5	0
RPS6B	3	5	0
RPS16B	4	4	3
RPS5	6	4	0
RPL31A	5	4	6
Cluster of RPL17A	6	4	5
RPS17B	4	4	0
Cluster of RPL16B	2	4	0
Cluster of RPS1B	6	4	0
RPL9A	3	4	2
RPL12B	3	4	0
RPL19B	6	3	0
RPS3	4	3	0
STM1	2	3	0
RPS20	4	3	0
ALD6	3	3	0
RPS26B	3	3	0
ACT1	2	3	2
RPL13A	4	2	2
PMA2	5	2	0
RPL5	5	2	0
RPL20A	4	2	0
RPL3	4	2	0
HHF1	0	2	5
RPL23A	2	2	0
RPL27B	3	2	0
RPL10	2	2	0
RPL25	3	2	0
RPL32	2	2	3
RPL30	2	2	0
RPS2	0	2	0
RPL34A	2	2	0
HTB2	0	2	2
SRO9	7	0	4
PDC1	6	0	2
RPL28	5	0	9
RPL11B	6	0	5
Cluster of RPS29B	3	0	5
RPS15	3	0	2
RPL36A	2	0	0
RPS11B	3	0	0
RPS8A	3	0	0
RPL35B	4	0	0
RPL4A	3	0	0
RPL15A	3	0	0
Cluster of YER138C	5	0	0
RPS0A	3	0	0
RPS27B	3	0	0
FUN12	4	0	0
RPS24A	2	0	0
FBA1	3	0	0
ARB1	2	0	0
HYP2	2	0	0
Cluster of ADH1	5	0	0
RPL18B	2	0	0
