# Supplementary material for: Dynamic control of Hsf1 during heat shock by a chaperone switch and phosphorylation
Source: eLife. 2016 Nov 10;5:e18638. doi: 10.7554/eLife.18638 (PMC5127643; doi:10.7554/eLife.18638)
Supplement: Figure 4—source data 1. — DOI: http://dx.doi.org/10.7554/eLife.18638.014 [file elife-18638-fig4-data1.xlsx]

## Sheet: Sheet1
Figure 4 source data 1 - phosphorylation sites
Hsf1 residue	30˚C OD 0.05	39˚C 15'	30˚C OD 0.5	39˚C 30'	AZC 1 mM	30˚C OD 1.5	menadione 125 µM	leucine depletion	glucole depletion	30˚C OD 3.0	30˚C OD 6.0
7
9														low confidence
10														mid confidence
26														high confidence
43
87
88
89
90													High confidence sites
97													Site	# observations
104													7	1
111													9	1
115													87	6
119													88	2
120													97	2
123													111	1
151													115	1
152													119	1
154													151	4
155													152	1
162													162	5
163													163	5
168													168	6
171													171	2
181													181	4
187													187	2
189													200	8
200													204	1
204													221	5
221													225	3
225													243	1
243													245	1
245													362	7
248													388	7
249													401	1
345													402	1
362													428	3
388													447	3
401													545	1
402													594	1
428													595	1
439													605	1
441													616	15
447													618	5
450													655	4
471													770	7
478													772	4
481													778	1
487													783	1
528
545
546
549
553
555
568
586
594
595
598
605
608
616
618
626
655
662
702
764
770
772
778
783
total sites	11	14	15	28	26	33	39	50	55	56	69
