# Supplementary material for: Dynamic control of Hsf1 during heat shock by a chaperone switch and phosphorylation
Source: eLife. 2016 Nov 10;5:e18638. doi: 10.7554/eLife.18638 (PMC5127643; doi:10.7554/eLife.18638)
Supplement: Figure 4—source data 2. — Values are FPKM. DOI: http://dx.doi.org/10.7554/eLife.18638.015 [file elife-18638-fig4-data2.xlsx]

## Sheet: Sheet1
Figure 4 source data 2 - RNA seq data matrix
all values are FPKM
HDGs
locus	gene	WT basal	WT HS	∆po4 basal	∆po4 HS	PO4* basal	PO4* HS
YAL001C	TFC3	24.7901	21.253	21.1951	23.4631	22.5262	21.7267
YAL002W	VPS8	75.4044	102.833	68.3314	115.54	62.8817	70.5759
YAL003W	EFB1	2610.53	1256.08	2568.94	721.538	3827.53	3659.44
YAL007C	ERP2	809.892	1018.29	714.026	862.565	599.094	609.001
YAL008W	FUN14	180.695	463.295	118.05	438.811	135.111	558.622
YAL009W	SPO7	69.9452	90.8711	78.8505	85.6113	90.9412	115.548
YAL010C	MDM10	101.394	101.431	110.274	163.29	210.295	195.017
YAL011W	SWC3	18.7063	16.349	14.04	11.9631	18.032	15.4858
YAL012W	CYS3	979.644	1207.23	825.44	1207.57	359.178	637.488
YAL013W	DEP1	62.1072	46.9125	51.4307	44.0017	62.3367	50.0915
YAL014C	SYN8	152.215	170.91	130.449	138.795	101.344	105.451
YAL015C	NTG1	45.806	56.3431	45.2105	67.4415	59.5419	98.9285
YAL016W	TPD3	100.425	110.041	99.5543	106.729	110.576	123.455
YAL017W	PSK1	30.1729	70.096	22.8984	76.0199	19.5108	53.6682
YAL018C	LDS1	4.19045	13.8707	2.05326	10.6945	7.24865	15.4083
YAL019W	FUN30	32.3989	23.7187	30.3736	28.6141	46.6438	32.4762
YAL020C	ATS1	73.9792	71.2829	77.7006	65.2655	81.0613	79.9047
YAL021C	CCR4	120.324	90.0749	106.26	90.383	148.126	97.1552
YAL022C	FUN26	127.883	102.024	107.921	97.8039	108.038	104.536
YAL023C	PMT2	333.233	392.434	270.72	332.041	219.571	256.387
YAL024C	LTE1	19.2139	17.1007	20.5458	19.6525	23.057	18.8412
YAL025C	MAK16	437.329	230.271	514.677	238.138	753.984	347.102
YAL026C	DRS2	33.9254	41.4486	33.8615	33.9092	36.2366	37.027
YAL027W	SAW1	39.967	47.8177	46.5225	57.8239	60.0262	77.4988
YAL028W	FRT2	22.0642	68.8759	13.9788	37.5508	10.8403	32.72
YAL029C	MYO4	73.072	57.8589	88.0342	68.4587	93.0264	74.0242
YAL030W	SNC1	636.353	909.502	547.092	903.624	305.819	554.891
YAL031C	GIP4	22.9451	29.1804	20.8947	27.4201	24.0173	30.3257
YAL032C	PRP45	30.8978	43.2696	36.6591	54.2567	39.949	47.6355
YAL033W	POP5	288.915	160.634	287.386	171.808	488.978	330.857
YAL034C	FUN19	75.7319	137.981	70.5786	102.211	63.3461	85.2959
YAL034W-A	MTW1	46.8011	36.587	48.0186	46.314	65.9078	54.6791
YAL035W	FUN12	168.874	100.811	154.166	79.8629	200.713	112.293
YAL036C	RBG1	133.724	83.1031	142.437	80.5641	176.824	108.092
YAL037W	YAL037W	29.4215	27.8423	25.234	36.431	26.8763	31.7119
YAL038W	CDC19	8964.38	8774.36	7826.24	7296.99	5626.63	4321.66
YAL039C	CYC3	96.4111	69.244	74.4114	98.5762	82.492	55.0959
YAL040C	CLN3	134.771	160.695	148.972	187.275	170.524	127.204
YAL041W	CDC24	43.3679	41.2397	44.5492	44.8807	59.3693	49.6068
YAL042W	ERV46	405.944	262.994	406.419	265.839	402.146	252.091
YAL043C	PTA1	46.0956	38.2831	41.1517	38.5914	40.2756	34.36
YAL044C	GCV3	1331.88	1416.86	680.189	1210.99	278.544	576.781
YAL044W-A	YAL044W-A	456.521	434.77	456.145	559.094	499.7	590.579
YAL046C	AIM1	263.66	175.522	189.011	179.747	138.279	149.194
YAL047C	SPC72	31.1014	26.1907	29.3421	36.9368	34.4091	39.9237
YAL048C	GEM1	21.7	25.7456	20.2536	30.0102	24.889	26.6253
YAL049C	AIM2	205.8	270.982	176.141	323.595	192.784	259.841
YAL051W	OAF1	46.205	54.3627	44.8598	52.7193	55.4917	48.8829
YAL053W	FLC2	152.341	281.899	192.974	385.659	116.049	240.881
YAL054C	ACS1	16.335	32.8608	13.4442	29.5815	12.208	32.3694
YAL055W	PEX22	63.9598	95.084	63.201	94.0243	74.9213	128.067
YAL056W	GPB2	40.5511	35.699	41.5693	36.6485	50.4802	45.4235
YAL058W	CNE1	42.6286	46.5449	42.608	44.1535	43.0564	48.1829
YAL059W	ECM1	339.534	113.372	416.438	112.267	717.427	232.363
YAL060W	BDH1	283.953	532.189	141.704	312.049	81.8739	490.601
YAL061W	BDH2	57.7878	67.5853	40.5631	49.9107	25.8962	37.6873
YAL062W	GDH3	32.2231	68.7894	27.4091	50.9964	20.2132	33.4401
YAL063C	FLO9	17.7339	40.9327	19.719	37.389	20.0721	29.7113
YAL063C-A	YAL063C-A	357621	625261	273357	604657	771793	1240000
YAL064C-A	TDA8	10.8373	23.9454	19.4704	22.8179	13.0927	16.6567
YAL064W	YAL064W	38686.9	52171	27802.1	33939.6	50633.1	52158.8
YAL067C	SEO1	3.50457	18.0621	2.73698	33.1923	9.00787	21.9277
YAL067W-A	YAL067W-A	7.75364	7.23885	1.39303	10.2033	2.34182	3.1361
YAR002C-A	ERP1	1775.19	2311.85	1512.13	2110.13	1103.57	1381.31
YAR002W	NUP60	89.4741	73.1383	95.0926	71.5174	104.041	72.2449
YAR003W	SWD1	88.4235	118.716	81.2891	111.362	78.3723	79.6106
YAR007C	RFA1	100.766	58.9936	90.7099	79.4035	91.5057	67.8447
YAR008W	SEN34	106.294	31.9937	102.486	49.4855	127.225	45.262
YAR009C	YAR009C	18136.8	22881.9	18267.6	22791.7	14720.3	15747.8
YAR014C	BUD14	82.4179	64.726	75.7212	59.4975	76.5385	55.8426
YAR015W	ADE1	1817.56	486.871	648.344	242.808	294.423	139.99
YAR018C	KIN3	43.2236	17.1709	45.9444	28.9376	41.8928	19.3002
YAR019C	CDC15	14.1872	28.3872	14.0787	26.2255	15.0205	21.0196
YAR020C	PAU7	118.889	409.297	184.228	345.495	107.724	216.392
YAR023C	YAR023C	16.326	38.0412	12.7186	29.8489	13.7983	43.1717
YAR027W	UIP3	156.231	297.558	154.031	226.738	147.228	327.564
YAR028W	YAR028W	82.7642	101.544	81.8251	84.2222	81.8952	84.1319
YAR029W	YAR029W	210.088	454.516	243.888	451.909	278.215	406.895
YAR031W	PRM9	24.5802	19.9631	22.3318	21.973	26.1346	20.0455
YAR035W	YAT1	8.64293	5.63446	6.8805	7.10301	4.11815	3.59625
YAR042W	SWH1	27.6684	33.5483	25.7387	35.3276	34.3781	35.3377
YAR068W	YAR068W	86.9272	55.6848	87.0114	56.7825	136.046	72.4495
YBL001C	ECM15	795.112	1457.45	711.786	1656.8	733.257	2298.14
YBL002W	HTB2	3663.62	375.783	3419.64	440.241	2589.28	348.97
YBL003C	HTA2	788.299	131.3	744.945	153.8	709.873	169.474
YBL004W	UTP20	57.153	30.5785	79.9393	33.3613	84.5522	38.1142
YBL005W	PDR3	39.1786	41.9668	37.2625	36.6784	38.1454	32.8398
YBL006C	LDB7	149.179	175.315	172.7	189.301	179.884	172.265
YBL007C	SLA1	66.8172	86.6533	55.005	71.0949	53.1715	79.6732
YBL008W	HIR1	32.5333	44.1012	31.4419	48.8222	34.5604	32.913
YBL009W	ALK2	51.4154	22.3976	52.4733	25.8041	40.0819	19.8036
YBL010C	YBL010C	41.1632	33.3717	45.7674	48.315	47.4828	36.962
YBL011W	SCT1	54.4301	41.6449	47.0541	25.4646	42.411	37.9177
YBL013W	FMT1	219.434	132.999	156.784	124.892	153.861	118.854
YBL014C	RRN6	26.2789	23.5228	32.1129	23.6605	41.445	23.3279
YBL015W	ACH1	37.5544	42.5833	23.447	25.0584	19.2697	24.169
YBL016W	FUS3	156.44	78.3678	151.857	87.4421	170.806	96.3368
YBL017C	PEP1	36.713	40.8523	38.86	40.7704	40.5824	35.4466
YBL018C	POP8	146.969	59.7532	178.87	85.003	261.769	145.255
YBL019W	APN2	26.7016	40.287	25.4235	46.1816	31.6937	44.2924
YBL020W	RFT1	108.904	80.6521	104.915	78.0262	119.078	76.1011
YBL021C	HAP3	133.282	112.832	119.692	128.356	191.772	145.918
YBL022C	PIM1	62.1243	60.4242	52.8465	61.3611	54.1722	61.8789
YBL023C	MCM2	47.3632	45.9221	41.2629	46.0332	47.2658	38.6246
YBL024W	NCL1	152.232	67.5897	153.363	69.4634	208.947	86.9181
YBL025W	RRN10	162.426	167.572	164.818	164.267	157.211	178.895
YBL026W	LSM2	977.177	712.49	962.878	886.498	1178.61	1196.34
YBL027W	RPL19B	3333.36	847.063	3576.92	752.935	2857.31	1055.43
YBL028C	YBL028C	1161.11	418.729	1359.57	472.343	2147.18	950.836
YBL029C-A	YBL029C-A	688.647	1250.04	641.414	2029.64	737.423	1188.06
YBL029W	YBL029W	49.4502	54.6603	44.1018	79.9873	42.78	55.337
YBL030C	PET9	783.88	267.005	529.74	219.205	406.629	212.233
YBL031W	SHE1	38.9727	18.1926	42.3285	23.7576	43.4739	26.8118
YBL032W	HEK2	165.926	64.1637	153.568	59.561	124.367	61.0757
YBL033C	RIB1	63.438	143.678	73.6907	210.884	92.1002	133.271
YBL034C	STU1	118.977	92.0183	112.208	119.634	158.269	114.836
YBL035C	POL12	33.0962	16.4627	28.5255	20.3266	22.0103	15.961
YBL036C	YBL036C	263.814	260.113	288.151	295.275	410.822	405.313
YBL037W	APL3	55.1915	60.3795	49.3183	57.4461	31.9752	45.0607
YBL038W	MRPL16	205.228	125.164	183.986	125.438	222.448	233.152
YBL039C	URA7	267.699	116.254	296.543	89.0882	447.207	161.877
YBL039W-B	YBL039W-B	320.904	424.747	324.03	513.161	268.683	591.474
YBL040C	ERD2	552.545	911.505	492.158	855.982	589.943	1310.43
YBL041W	PRE7	304.165	371.289	320.302	421.653	312.691	439.983
YBL042C	FUI1	165.788	161.836	142.057	124.254	166.602	157.079
YBL043W	ECM13	19.8366	29.7196	13.5427	22.7061	55.9752	28.2726
YBL045C	COR1	545.585	282.709	397.603	269.941	597.693	319.344
YBL046W	PSY4	53.4894	50.3236	54.3649	49.7883	68.4511	58.3387
YBL047C	EDE1	130.116	150.24	94.1927	116.111	68.2921	114.119
YBL049W	MOH1	41.802	406.232	43.2689	456.53	49.9277	249.387
YBL050W	SEC17	168.518	245.572	161.087	254.938	158.579	255.379
YBL051C	PIN4	128.075	95.5556	104.449	89.4951	144.771	107.998
YBL052C	SAS3	30.2132	16.4288	27.0453	20.3987	38.992	23.8131
YBL054W	TOD6	134.372	86.6158	184.911	111.253	251.036	108.004
YBL055C	YBL055C	64.8676	66.9895	90.8222	74.1838	101.417	91.5719
YBL056W	PTC3	227.327	210.152	185.497	167.694	212.422	226.935
YBL057C	PTH2	257.754	215.181	249.93	179.078	255.775	250.134
YBL058W	SHP1	173.899	197.34	177.557	223.405	169.658	222.015
YBL059C-A	CMC2	676.07	602.349	415.469	378.951	536.676	788.177
YBL059W	YBL059W	130.036	103.417	118.481	110.307	136.215	126.202
YBL060W	YEL1	80.9937	110.725	101.398	167.799	123.759	155.456
YBL061C	SKT5	67.8458	101.923	84.0592	150.265	89.3335	106.527
YBL063W	KIP1	66.3234	35.2191	58.6446	49.2235	73.8609	47.1909
YBL064C	PRX1	120.721	301.853	68.107	423.558	43.8118	237.033
YBL066C	SEF1	42.6545	38.3569	30.7544	35.122	38.5167	34.599
YBL067C	UBP13	59.382	60.9454	64.5233	55.366	66.5194	62.9882
YBL068W	PRS4	123.947	69.5321	142.705	71.4169	169.907	89.4932
YBL069W	AST1	60.6525	49.7091	52.2583	44.2401	50.8346	43.7721
YBL071W-A	KTI11	526.085	469.397	730.413	531.635	761.781	493.581
YBL072C	RPS8A	1612	397.44	1922.41	316.243	1361	558.502
YBL074C	AAR2	10.9033	20.6107	10.8806	24.5763	10.4662	18.4697
YBL075C	SSA3	24.6323	403.775	27.2417	644.528	26.5173	512.625
YBL076C	ILS1	204.005	92.2057	225.844	73.7698	224.595	117.419
YBL078C	ATG8	98.2502	555.049	84.651	759.387	64.0057	545.035
YBL079W	NUP170	35.2254	24.2757	40.5705	27.3056	52.9126	27.3372
YBL080C	PET112	20.2547	14.9449	16.1289	18.1705	23.6806	28.9376
YBL081W	YBL081W	454.967	352.509	439.093	351.509	508.071	323.335
YBL082C	ALG3	132.081	75.9209	119.537	58.0926	88.6559	57.3401
YBL084C	CDC27	22.9139	27.725	22.2713	24.9368	28.808	30.6646
YBL085W	BOI1	58.3112	39.0183	61.0569	45.6642	82.2641	56.0827
YBL086C	YBL086C	34.3158	40.6813	37.2036	44.034	52.3691	55.2955
YBL087C	RPL23A	2384.63	493.11	2409.13	384.041	2452.62	945.508
YBL088C	TEL1	70.8618	99.1985	60.5604	97.7351	74.6297	80.005
YBL089W	AVT5	60.8701	75.9924	57.3768	67.157	55.6176	63.4225
YBL090W	MRP21	298.952	228.306	219.945	173.828	277.313	401.752
YBL091C	MAP2	248.167	173.726	231.26	166.813	219.073	191.213
YBL091C-A	SCS22	61.5156	129.698	55.7968	126.291	39.7724	119.251
YBL092W	RPL32	6833.71	1489.38	7570.45	1228.16	4907.83	1765.16
YBL093C	ROX3	147.634	280.898	189.697	342.284	242.139	388.43
YBL095W	MRX3	65.9293	85.6377	72.0718	99.7742	73.4963	91.3738
YBL097W	BRN1	45.6162	39.3781	49.8025	33.6785	59.4824	50.9309
YBL098W	BNA4	115.24	38.523	72.8553	35.1129	63.8445	50.666
YBL099W	ATP1	442.616	175.263	302.652	141.452	308.25	171.895
YBL100W-C	YBL100W-C	454.878	477.762	347.327	731.61	274.773	444.628
YBL101C	ECM21	63.6391	157.461	39.1239	127.069	21.1749	67.9476
YBL102W	SFT2	264.489	280.491	201.09	253.816	215.392	362.676
YBL103C	RTG3	49.9279	42.2097	45.678	42.3789	50.6142	52.52
YBL104C	SEA4	40.8632	39.5452	38.0357	36.5564	41.9898	34.5037
YBL105C	PKC1	256.574	263.623	268.096	290.089	260.59	211.643
YBL106C	SRO77	28.5918	46.73	29.3513	47.0869	36.4616	30.5474
YBL107C	MIX23	276.451	391.742	231.325	344.377	279.404	371.196
YBR001C	NTH2	27.4105	68.646	20.632	56.4135	24.7186	55.2759
YBR002C	RER2	165.014	238.063	193.647	276.628	238.854	200.836
YBR003W	COQ1	111.161	108.127	84.0743	83.2416	95.5615	108.255
YBR004C	GPI18	67.4067	62.6545	86.0437	95.1144	77.5066	78.7586
YBR005W	RCR1	104.727	135.356	121.593	157.195	98.2596	134.723
YBR006W	UGA2	27.6933	73.6792	19.0638	86.1342	19.5345	59.3426
YBR007C	DSF2	33.7389	41.7999	33.2112	55.3215	29.714	38.6072
YBR008C	FLR1	37.7265	29.6795	33.1847	28.4868	29.3631	21.1765
YBR009C	HHF1	2697.68	446.528	2507.76	460.447	2821.06	655.356
YBR010W	HHT1	1997.51	385.177	3053.57	688.749	3063.36	970.82
YBR011C	IPP1	2322.09	1174.37	2099.12	1302.29	1846.63	919.305
YBR014C	GRX7	215.776	352.139	212.213	367.075	260.722	549.145
YBR015C	MNN2	227.948	212.298	194.746	165.686	149.569	138.567
YBR016W	YBR016W	450.205	268.705	387.005	264.268	329.019	268.046
YBR017C	KAP104	80.7856	66.1686	81.6242	63.0243	92.134	67.2518
YBR018C	GAL7	57.7532	115.308	23.9238	154.69	35.5527	125.875
YBR019C	GAL10	27.6271	81.8878	24.7657	96.0294	43.014	119.794
YBR020W	GAL1	8.97618	8.69527	7.49346	7.28263	6.26806	4.88628
YBR021W	FUR4	47.3845	55.1445	49.9852	52.5878	44.8476	51.3077
YBR022W	POA1	142.59	179.066	106.732	158.772	154.985	297.479
YBR023C	CHS3	79.0629	82.5515	98.0044	108.706	74.2529	74.9848
YBR024W	SCO2	60.2485	58.0101	40.8999	58.5311	50.6212	78.9391
YBR025C	OLA1	755.774	778.442	770.678	353.024	781.422	877.799
YBR026C	ETR1	126.439	203.882	101.104	206.891	93.8623	230.608
YBR028C	YPK3	101.281	61.2157	103.967	53.2819	112.344	64.1672
YBR029C	CDS1	210.324	197.095	186.071	158.857	167.852	181.953
YBR030W	RKM3	99.1381	77.5347	112.922	83.0179	108.926	73.251
YBR033W	EDS1	23.9542	44.6073	24.3504	51.8772	24.5072	40.621
YBR034C	HMT1	419.096	269.749	456.758	290.007	607.334	329.985
YBR035C	PDX3	288.756	301.794	264.808	323.944	271.269	499.613
YBR036C	CSG2	402.696	390.62	354.164	316.829	320.407	372.516
YBR037C	SCO1	129.273	62.9924	84.7241	44.3944	58.3027	59.1683
YBR038W	CHS2	61.2407	10.9777	50.1013	17.1722	46.6923	8.52828
YBR039W	ATP3	495.296	283.303	421.105	252.346	437.551	257.39
YBR040W	FIG1	9.99109	2.07283	7.18004	14.6085	4.02346	17.0623
YBR041W	FAT1	104.779	110.253	102.988	105.538	93.9043	95.8247
YBR042C	CST26	85.9706	72.4423	87.2873	68.1584	104.573	89.596
YBR043C	QDR3	52.5692	38.3789	47.1915	32.5723	54.9356	38.7963
YBR044C	TCM62	49.834	35.5935	46.559	32.2538	53.608	48.785
YBR045C	GIP1	2051.16	8957.91	2406.42	8206.34	3851.61	7107
YBR046C	ZTA1	50.0219	96.2391	29.2816	99.5437	54.1021	95.3735
YBR047W	FMP23	11.362	14.2446	8.22358	14.6669	15.0013	28.3613
YBR048W	RPS11B	2564.91	545.191	2567.08	344.138	1194.51	470.373
YBR049C	REB1	65.1653	39.4085	53.0708	30.2519	54.1139	32.6001
YBR050C	REG2	114.408	21.1014	63.493	46.565	54.4796	32.8128
YBR052C	RFS1	356.038	631.865	237.641	335.683	180.142	641.214
YBR053C	YBR053C	128.536	221.596	90.4184	172.838	80.009	258.823
YBR054W	YRO2	89.3848	767.144	237.071	1317.12	23.1982	364.077
YBR055C	PRP6	37.942	32.4814	42.3822	31.7784	44.7078	37.412
YBR056W	YBR056W	56.3553	121.012	46.146	109.433	33.1908	140.738
YBR057C	MUM2	66.1127	54.014	61.8589	59.5589	65.8705	66.7139
YBR058C	UBP14	51.4229	45.4075	50.3382	45.6603	60.4686	47.999
YBR058C-A	TSC3	1502.49	1399.53	1647.98	1402.38	1546.84	2284.69
YBR059C	AKL1	27.5979	43.3123	25.5568	46.8208	26.553	39.8463
YBR060C	ORC2	39.5065	32.7378	41.0425	27.1438	47.4515	35.5736
YBR061C	TRM7	98.2248	50.2593	121.575	51.772	120.251	58.0816
YBR062C	YBR062C	83.8884	174.731	91.4734	183.986	97.9602	217.579
YBR063C	YBR063C	23.0001	36.6069	26.3397	35.9928	26.8625	36.6698
YBR065C	ECM2	35.8409	53.6735	37.7978	57.6604	44.0195	58.447
YBR066C	NRG2	40.6432	88.0896	44.8103	80.0678	61.6257	85.9818
YBR067C	TIP1	593.847	2033.41	2896.64	11630.7	276.49	456.576
YBR068C	BAP2	309.213	368.366	294.681	328.311	337.557	486.071
YBR069C	TAT1	200.267	94.3295	178.097	73.2397	261.01	105.992
YBR070C	ALG14	115.01	93.4028	105.356	102.842	99.2708	88.1788
YBR071W	YBR071W	311.768	209.19	369.74	473.647	277.934	164.038
YBR072W	HSP26	35.8176	15252.6	33.8125	18940.2	31.2056	10919.4
YBR073W	RDH54	61.1475	35.1564	70.0812	67.2067	70.8264	39.9416
YBR074W	PFF1	62.038	55.5573	64.459	44.0883	63.3959	58.5627
YBR076W	ECM8	172.657	582.122	130.37	710.298	126.468	629.747
YBR077C	SLM4	145.722	156.383	125.594	169.022	103.579	130.31
YBR078W	ECM33	2391.86	900.553	1825.12	960.464	1364.52	740.762
YBR079C	RPG1	167.7	68.6348	171.57	64.3891	194.231	86.14
YBR080C	SEC18	90.2677	91.3731	77.742	86.437	75.2905	73.1491
YBR081C	SPT7	77.7311	62.4048	65.544	59.301	82.7199	79.6491
YBR082C	UBC4	3008.77	5908.06	3494.78	4018.36	4305.73	7682.59
YBR083W	TEC1	70.0848	30.2522	68.746	30.9204	57.9183	34.4524
YBR084C-A	RPL19A	2229.73	671.081	2636.25	642.315	2257.09	942.003
YBR084W	MIS1	101.264	44.6243	110.205	43.4556	176.891	71.5199
YBR085C-A	YBR085C-A	2700.9	13911.1	3790.43	17579.3	2790.73	17739.3
YBR085W	AAC3	17.8372	19.0854	14.907	13.5385	16.2226	17.0232
YBR086C	IST2	246.729	184.979	242.449	166.854	177.484	148
YBR087W	RFC5	117.066	69.9861	124.84	73.9223	133.261	98.8984
YBR088C	POL30	297.948	50.8328	265.133	94.0963	214.92	49.0785
YBR089C-A	NHP6B	803.373	1181.84	641.18	930.12	526.696	691.667
YBR091C	TIM12	226.055	240.339	191.521	222.193	194.207	196.013
YBR092C	PHO3	317.605	58.969	413.437	95.441	227.581	71.2676
YBR093C	PHO5	272.847	49.7064	199.764	49.8082	58.4101	37.5399
YBR094W	PBY1	42.758	25.9811	45.3866	35.6514	42.0935	29.444
YBR095C	RXT2	35.0169	50.0141	32.9027	57.8877	42.4119	50.4621
YBR096W	YBR096W	471.131	560.785	447.324	571.017	408.829	687.165
YBR097W	VPS15	77.3994	100.207	71.1773	119.893	68.97	95.9888
YBR098W	MMS4	14.7627	18.7517	14.8581	20.3738	19.2226	22.1984
YBR101C	FES1	144.393	332.233	144.911	101.622	517.671	1020.54
YBR102C	EXO84	26.4049	25.876	27.0989	28.4006	26.2398	28.0898
YBR103W	SIF2	45.1066	41.8347	41.0881	53.0223	55.0914	51.7986
YBR104W	YMC2	119.744	55.677	138.916	60.0654	216.783	124.582
YBR105C	VID24	257.02	380.849	164.88	257.013	212.388	266.671
YBR106W	PHO88	1419.14	848.242	1400.03	731.8	1235.03	979.823
YBR107C	IML3	64.5523	127.652	74.4422	136.219	43.6516	63.2934
YBR108W	AIM3	13.6508	29.6493	10.5189	29.746	8.98531	24.1798
YBR109C	CMD1	519.881	491.802	495.22	467.492	336.648	315.055
YBR110W	ALG1	116.61	119.363	110.455	123.121	112.595	115.68
YBR111C	YSA1	239.114	397.031	191.044	394.419	172.846	441.203
YBR111W-A	SUS1	233.188	348.905	218.907	310.924	233.676	381.641
YBR112C	CYC8	66.7992	46.246	48.1216	41.5349	45.6734	37.2469
YBR114W	RAD16	15.4088	46.7641	16.7279	41.4923	15.7218	32.2743
YBR115C	LYS2	51.5905	27.1215	91.2543	35.2498	44.7581	30.4083
YBR117C	TKL2	21.8758	145.365	29.2316	176.231	19.3925	35.1543
YBR119W	MUD1	49.0745	61.6782	60.0514	73.8128	55.4441	60.7793
YBR120C	CBP6	219.232	133.281	133.859	115.053	182.13	229.088
YBR121C	GRS1	427.628	157.349	395.969	125.231	459.642	201.934
YBR122C	MRPL36	878.647	550.319	597.351	428.62	715.26	695.696
YBR123C	TFC1	25.7123	18.632	22.6619	19.2379	25.1565	21.7265
YBR125C	PTC4	115.192	106.705	116.623	103.341	123.371	106.927
YBR126C	TPS1	193.215	621.163	121.283	403.606	72.9942	413.95
YBR127C	VMA2	671.293	414.243	532.283	323.364	444.857	346.942
YBR128C	ATG14	16.6347	30.624	16.1313	36.9232	18.7044	36.2621
YBR129C	OPY1	98.8124	83.4388	99.1818	85.7191	106.75	114.594
YBR130C	SHE3	190.479	144.056	234.79	172.185	213.224	160.16
YBR131W	CCZ1	41.6995	48.8599	42.224	70.7356	57.3888	60.7301
YBR132C	AGP2	39.334	92.9551	20.7885	70.4409	17.9702	86.6679
YBR133C	HSL7	86.5538	38.3231	78.8889	40.8498	73.8521	35.2964
YBR135W	CKS1	253.909	362.345	312.577	514.482	260.042	230.056
YBR136W	MEC1	1078.5	1956.73	1674.96	1655.93	2056.6	1623.63
YBR137W	YBR137W	174.827	482.33	135.997	481.28	124.399	367.702
YBR138C	YBR138C	44.7388	19.7418	38.0974	41.7335	48.9528	31.4593
YBR139W	YBR139W	158.774	384.308	106.329	370.427	55.4943	254.907
YBR140C	IRA1	504.896	1013.93	714.861	1177.98	826.911	757.61
YBR141C	BMT2	41.8722	51.2084	43.553	42.5878	44.7068	47.292
YBR142W	MAK5	80.7823	46.7356	100.512	50.5634	175.975	85.5774
YBR143C	SUP45	545.166	309.525	556.96	269.879	626.883	348.821
YBR145W	ADH5	110.732	152.045	52.8487	58.929	45.5454	82.6918
YBR146W	MRPS9	666.441	306.484	421.293	205.499	361.804	266.154
YBR147W	RTC2	15.0412	45.1317	10.0832	35.7787	4.81407	45.6427
YBR148W	YSW1	11.2494	13.387	7.30937	15.0035	26.1727	28.1262
YBR149W	ARA1	330.152	612.377	215.841	585.45	122.841	458.536
YBR150C	TBS1	52.5995	47.1252	43.4021	48.8201	33.2182	46.7089
YBR151W	APD1	464.977	506.621	377.671	470.856	377.975	409.178
YBR152W	SPP381	25.3679	23.6138	24.2805	20.1542	26.3079	24.7584
YBR153W	RIB7	82.4504	60.0482	81.5857	50.8863	74.462	53.927
YBR154C	RPB5	373.341	255.988	460.869	296.287	657.086	494.923
YBR155W	CNS1	82.4594	78.3408	86.8007	83.3002	122.668	109.908
YBR156C	SLI15	21.2389	18.657	20.6929	22.9508	20.3147	18.3357
YBR157C	ICS2	101.543	416.039	107.515	365.254	56.3338	291.08
YBR158W	AMN1	394.715	294.432	403.324	229.24	374.774	211.224
YBR159W	IFA38	334.611	269.978	313.69	230.952	357.072	356.256
YBR160W	CDC28	117.348	178.139	138.829	218.104	122.088	173.51
YBR161W	CSH1	43.0297	44.5623	41.4817	39.5428	35.6084	44.1512
YBR162C	TOS1	1220.82	278.877	1176.28	263.205	741.216	230.547
YBR162W-A	YSY6	2395.02	2359.87	3659.99	3782.64	5045.63	3321.3
YBR163W	EXO5	40.3649	35.853	44.8885	33.9362	44.6452	32.7031
YBR164C	ARL1	290.979	258.589	278.64	232.677	289.622	339.132
YBR165W	UBS1	83.8997	87.6061	74.0924	78.52	90.8453	112.834
YBR166C	TYR1	91.1245	97.8739	91.592	96.9753	101.906	112.995
YBR167C	POP7	121.202	153.168	122.703	157.27	130.906	182.11
YBR168W	PEX32	39.5755	57.1128	41.1479	55.5744	54.8549	68.0574
YBR169C	SSE2	22.4651	230.964	26.3015	183.401	14.8958	174.508
YBR170C	NPL4	41.7027	58.8052	38.6512	61.9074	35.9081	51.7034
YBR171W	SEC66	427.832	530.535	424.255	521.57	480.174	503.452
YBR172C	SMY2	114.675	102.571	99.4286	89.7415	128.949	102.501
YBR173C	UMP1	863.162	1108.57	863.291	1185.82	716.084	951.06
YBR175W	SWD3	97.3281	88.2616	95.6893	82.6593	105.768	125.972
YBR176W	ECM31	27.5122	38.7136	25.3797	37.1906	33.3777	39.0544
YBR177C	EHT1	193.826	251.562	154.248	316.539	153.933	231.505
YBR179C	FZO1	37.0105	28.316	32.2057	28.2676	39.7309	33.6218
YBR180W	DTR1	7.50081	10.9074	7.69359	10.5286	11.5744	14.9302
YBR182C	SMP1	19.0052	63.4738	31.3595	120.491	27.9508	52.3259
YBR183W	YPC1	78.7734	176.319	59.7352	167.808	39.2903	187.55
YBR184W	YBR184W	16.8363	11.5772	17.9855	17.7744	26.5297	39.1971
YBR185C	MBA1	140.276	107.738	103.921	83.3897	117.02	123.632
YBR186W	PCH2	21.3237	19.8007	17.472	18.455	20.1544	17.9935
YBR187W	GDT1	437.157	134.63	412.607	113.978	275.572	130.541
YBR188C	NTC20	132.899	144.128	121.313	160.95	142.92	181.531
YBR189W	RPS9B	4237.31	871.71	4257.11	694.646	3748.54	1274.06
YBR191W	RPL21A	6603.93	1385.06	5915.84	1049.09	6319.56	2240.54
YBR192W	RIM2	125.91	68.5517	107.065	70.2804	131.402	96.6463
YBR193C	MED8	86.2116	107.207	92.8068	94.3606	75.033	87.4831
YBR194W	AIM4	101.226	197.388	81.6121	172.197	109.759	188.496
YBR195C	MSI1	35.0311	30.8679	35.9237	30.6941	46.6806	32.6187
YBR196C	PGI1	1291.66	1580.16	1175.62	1463.58	915.13	1156.87
YBR196C-B	YBR196C-B	981.829	577.145	1058.38	893.25	955.52	823.655
YBR197C	YBR197C	92.1933	64.1171	86.2575	68.3739	76.8409	53.8717
YBR198C	TAF5	41.1545	36.845	36.533	32.5106	41.403	36.0757
YBR199W	KTR4	165.634	240.054	163.452	215.028	188.602	307.246
YBR200W	BEM1	61.5035	69.333	59.6619	74.0501	65.3237	65.3904
YBR201C-A	YBR201C-A	812.247	1338.86	732.067	1544.9	409.209	658.42
YBR201W	DER1	74.6745	393.357	72.9427	379.139	80.9557	308.767
YBR202W	MCM7	65.5447	31.427	56.816	38.7897	60.0486	25.4314
YBR203W	COS111	31.0903	48.4422	28.8652	68.0311	21.3118	41.3099
YBR204C	LDH1	38.3362	63.9536	31.1324	62.6204	29.0087	55.4135
YBR205W	KTR3	182.984	126.624	172.707	112.887	184.273	128.208
YBR207W	FTH1	110.337	113.211	96.3831	92.9699	135.34	135.663
YBR208C	DUR1,2	28.8041	26.794	27.6408	41.4918	22.6175	19.2978
YBR210W	ERV15	265.378	244.785	276.031	208.737	321.051	320.326
YBR211C	AME1	131.713	108.184	137.006	119.231	175.188	173.759
YBR212W	NGR1	125.022	116.102	98.0867	136.177	113.766	136.855
YBR213W	MET8	39.4566	71.3226	22.7884	91.5252	28.0062	34.8195
YBR214W	SDS24	102.209	360.839	60.8534	350.622	32.475	269.096
YBR215W	HPC2	39.3202	36.1133	40.7993	42.0471	48.8116	43.4883
YBR216C	YBP1	50.3482	47.7897	50.9912	44.5384	49.3303	41.3868
YBR217W	ATG12	53.4901	62.9309	66.0987	82.6615	93.5183	121.602
YBR218C	PYC2	94.863	58.8908	58.5566	45.4341	48.2691	43.9878
YBR220C	YBR220C	76.3039	61.993	73.7744	53.1401	79.7002	64.2347
YBR221C	PDB1	661.138	352.593	572.931	359.352	423.682	348.583
YBR222C	PCS60	114.073	151.436	112.094	212.429	95.2328	123.135
YBR223C	TDP1	39.9334	52.4978	31.2631	41.0466	31.6081	40.9467
YBR225W	YBR225W	50.3395	77.8345	43.0849	78.0498	46.7298	55.1734
YBR227C	MCX1	1334.39	964.308	1759.05	1194	2083.81	1598.35
YBR228W	SLX1	39.344	49.4001	40.172	45.7936	41.7082	50.2087
YBR229C	ROT2	44.0147	53.2588	42.371	53.8827	45.2178	61.0252
YBR230C	OM14	402.67	590.339	311.192	710.726	213.955	418.524
YBR230W-A	YBR230W-A	597.078	1325.57	695.35	1861.4	751.931	2649.3
YBR231C	SWC5	28.4922	34.9399	33.9467	47.2463	37.6908	42.9851
YBR233W	PBP2	33.6255	26.8192	30.63	29.2649	41.3229	33.5418
YBR233W-A	DAD3	802.246	431.323	836.474	404.742	1159.45	732.42
YBR234C	ARC40	563.244	419.437	468.34	450.623	338.839	391.257
YBR235W	VHC1	25.1244	32.7269	23.6624	32.0485	19.8099	23.4354
YBR236C	ABD1	58.6329	60.2574	66.7081	63.4365	62.3442	67.543
YBR237W	PRP5	91.9968	112.255	92.0794	134.077	120.6	131.333
YBR238C	YBR238C	83.5657	98.7558	95.4548	102.481	85.2349	60.8845
YBR239C	ERT1	34.5303	51.1645	34.5714	44.5211	33.1544	35.0034
YBR240C	THI2	14.6495	43.5693	12.9781	51.0048	14.3558	44.1959
YBR241C	YBR241C	57.5646	167.989	39.9023	137.249	28.1109	110.885
YBR242W	YBR242W	223.739	134.024	250.643	137.366	240.309	150.203
YBR243C	ALG7	149.432	174.934	118.593	141.592	86.8378	107.524
YBR244W	GPX2	64.6716	54.8603	70.4418	47.6994	86.9025	71.4383
YBR245C	ISW1	42.8643	46.4598	41.2087	40.0009	38.768	36.5307
YBR246W	RRT2	120.252	139.613	118.715	129.251	110.785	103.081
YBR247C	ENP1	127.99	67.4336	132.399	52.2776	113.04	75.6598
YBR248C	HIS7	252.892	127.389	129.282	95.1464	132.022	122.842
YBR249C	ARO4	832.412	224.116	747.532	149.36	812.16	367.151
YBR250W	SPO23	2721.67	3112.66	578.051	3117.27	1611.5	3518.38
YBR251W	MRPS5	95.5997	49.458	74.2926	40.8909	83.4176	75.1499
YBR252W	DUT1	416.85	157.068	458.907	153.296	474.984	233.462
YBR253W	SRB6	166.931	170.781	190.919	218.395	232.151	279.955
YBR254C	TRS20	130.76	99.8564	130.724	93.5685	135.541	152.206
YBR255C-A	YBR255C-A	157.063	138.204	150.535	158.726	130.331	90.2682
YBR255W	MTC4	19.1879	30.3587	19.9347	30.6833	26.6074	33.5536
YBR256C	RIB5	249.985	290.885	236.583	289.547	248.66	509.669
YBR257W	POP4	66.4198	60.1538	76.996	78.7477	94.7434	84.2874
YBR258C	SHG1	172.118	281.504	183.714	355.048	312.865	493.13
YBR259W	YBR259W	22.8317	26.6092	27.7362	33.7254	31.4229	33.0516
YBR260C	RGD1	43.7551	53.884	38.8849	48.242	39.7956	51.1882
YBR261C	TAE1	121.766	86.8609	129.236	100.647	122.07	88.6283
YBR262C	MIC12	679.167	491.044	537.207	543.862	859.52	932.365
YBR263W	SHM1	214.229	85.2107	217.348	91.5461	230.101	101.493
YBR264C	YPT10	82.6646	102.309	96.5569	140.13	110.625	145.304
YBR265W	TSC10	191.559	90.3986	175.969	82.6618	160.51	87.7778
YBR267W	REI1	196.283	103.095	240.837	123.016	312.265	131.234
YBR268W	MRPL37	1624.82	814.684	1162.65	659.896	1394.74	1226.85
YBR269C	SDH8	275.083	501.655	196.692	469.849	178.784	421.84
YBR270C	BIT2	44.6736	48.2003	47.9129	58.903	56.9928	45.0142
YBR271W	EFM2	57.9282	31.221	73.8699	33.8665	75.2962	33.3344
YBR272C	HSM3	35.9602	52.2443	34.5358	52.5678	32.4423	45.9589
YBR273C	UBX7	67.2974	90.4514	61.2575	104.548	71.6846	107.719
YBR274W	CHK1	47.8449	45.7891	43.0348	43.4482	46.4282	49.4407
YBR275C	RIF1	293.389	192.002	356.126	271.719	421.242	304.382
YBR276C	PPS1	123.211	100.793	119.755	103.405	129.251	93.3645
YBR278W	DPB3	106.358	90.8814	86.3346	95.001	89.3691	109.89
YBR279W	PAF1	136.841	160.871	114.576	178.55	192.464	213.733
YBR280C	SAF1	14.107	28.7073	10.7814	27.459	9.43681	23.96
YBR281C	DUG2	38.8193	46.118	37.2102	48.052	43.8714	42.8328
YBR282W	MRPL27	317.853	230.827	247.998	218.925	336.604	381.024
YBR283C	SSH1	639.214	324.195	571.628	244.876	456.824	302.616
YBR284W	YBR284W	13.9308	30.8874	11.1687	27.3122	11.8835	30.3936
YBR285W	YBR285W	16.2574	122.385	7.0987	149.846	7.83145	82.7361
YBR286W	APE3	1308.32	1329.79	1085.61	1208.37	1143.44	1382.11
YBR287W	YBR287W	222.65	427.89	205.207	284.658	143.912	322.576
YBR288C	APM3	44.9956	29.5049	56.3968	39.9068	60.9485	48.9202
YBR289W	SNF5	19.104	15.6989	17.9225	19.0995	26.6161	23.334
YBR290W	BSD2	88.7708	170.574	101.392	199.742	146.326	245.07
YBR291C	CTP1	151.885	74.2443	410.819	156.929	70.4331	51.4533
YBR293W	VBA2	43.548	38.4976	41.2391	40.8864	40.8434	38.7155
YBR294W	SUL1	54.4853	80.4736	54.4068	98.1449	50.7365	53.0088
YBR295W	PCA1	23.2949	52.4931	24.6469	81.0118	19.1177	35.6421
YBR296C	PHO89	98.4672	10.3121	43.229	7.12987	35.2557	14.2656
YBR297W	MAL33	37.6608	21.2959	26.9793	18.6911	28.3827	18.5482
YBR298C	MAL31	19.7151	12.5246	12.9454	9.64719	9.58161	6.73423
YCL001W	RER1	454.779	344.164	395.897	314.229	563.306	479.2
YCL001W-A	YCL001W-A	23.0398	55.6732	35.0628	60.6377	27.0161	54.8169
YCL001W-B	YCL001W-B	31.5653	111.224	41.7096	120.594	48.8982	126.848
YCL002C	YCL002C	103.01	65.0437	115.48	70.6104	118.06	83.6555
YCL004W	PGS1	28.1297	31.7254	28.5522	30.2019	29.2088	32.278
YCL005W	LDB16	197.871	153.754	187.484	146.057	162.255	124.561
YCL005W-A	VMA9	1724.33	1050.51	1680.61	1088.64	1760.81	970.394
YCL008C	STP22	40.6758	39.5252	31.2667	33.8852	36.9885	38.8293
YCL009C	ILV6	886.936	387.917	689.398	307.89	265.122	228.072
YCL010C	SGF29	55.1711	66.953	56.7023	69.6072	55.3016	55.9986
YCL011C	GBP2	345.933	232.942	341.79	233.708	401.279	250.989
YCL012C	YCL012C	133.752	187.433	123.003	217.443	93.6362	134.103
YCL014W	BUD3	34.8129	21.9367	35.1162	25.2351	32.0085	20.3794
YCL016C	DCC1	26.6426	26.8972	29.6316	32.5557	30.1756	37.8447
YCL017C	NFS1	125.194	88.8656	103.384	90.8145	98.1093	76.0944
YCL018W	LEU2	116061	188618	60237.9	113132	23369.1	45204.3
YCL021W-A	YCL021W-A	63.3084	58.8302	84.4324	79.3056	53.0939	54.5473
YCL024W	KCC4	23.8409	11.0542	20.6046	22.7426	24.8828	15.1383
YCL025C	AGP1	209.704	266.396	113.408	219.585	60.4913	86.3384
YCL026C-A	FRM2	6.52932	6.33965	5.48994	4.69704	7.92761	5.59872
YCL026C-B	HBN1	13.779	31.4587	13.9081	122.53	6.92346	17.4288
YCL027W	FUS1	11.2209	12.1572	17.509	13.4595	20.4911	19.0225
YCL028W	RNQ1	221.095	167.718	199.106	191.058	205.041	162.812
YCL029C	BIK1	55.0973	50.5011	53.7967	57.8125	68.5491	53.0034
YCL030C	HIS4	240.663	189.2	130.535	80.7669	88.2527	74.0802
YCL031C	RRP7	132.535	119.628	153.521	166.688	264.77	259.544
YCL032W	STE50	56.7596	49.778	62.2797	79.0972	71.5713	92.4233
YCL033C	MXR2	114.608	175.115	106.237	208.618	80.0797	230.04
YCL034W	LSB5	81.9186	52.2754	79.2604	75.9716	61.6513	71.0967
YCL035C	GRX1	1664.69	8746.32	1260.13	6804.61	968.851	5055.88
YCL036W	GFD2	46.8483	40.3419	57.6332	46.1613	84.6983	51.1639
YCL037C	SRO9	12.0345	25.9592	8.6641	27.5949	15.4313	14.6554
YCL038C	ATG22	30.6174	86.7678	29.7113	92.6412	14.9782	43.7962
YCL039W	GID7	28.0512	31.8755	23.8204	30.9773	23.7777	32.3241
YCL040W	GLK1	528.7	3289.34	253.765	2421.13	94.4976	1297.55
YCL043C	PDI1	1575.47	4703.9	1216.74	3631.91	595.406	1740.7
YCL044C	MGR1	108.513	320.604	82.1665	273.788	63.0699	173.883
YCL045C	EMC1	202.843	133.094	185.814	118.437	183.895	137.385
YCL047C	POF1	113.266	214.302	131.122	235.542	159.824	273.353
YCL048W	SPS22	16.994	28.7566	13.1667	44.26	18.7663	52.4107
YCL048W-A	YCL048W-A	33.1599	1756.09	28.3497	1709.34	13.4688	579.035
YCL049C	YCL049C	144.22	266.34	132.183	280.702	90.3687	143.158
YCL050C	APA1	585.88	785.485	544.438	414.161	801.083	996.718
YCL051W	LRE1	31.9032	36.7164	35.6762	34.3708	38.4977	37.8674
YCL052C	PBN1	135.948	194.855	120.084	170.241	101.977	173.442
YCL054W	SPB1	100.278	57.7424	108.335	76.6355	193.723	100.404
YCL055W	KAR4	33.6922	44.1667	38.8689	43.5776	44.067	74.671
YCL056C	PEX34	228.623	244.708	249.568	267.848	329.646	373.061
YCL057C-A	MIC10	843.376	654.8	852.413	626.504	720.663	634.717
YCL057W	PRD1	140.941	150.112	113.974	153.361	114.136	137.729
YCL058C	FYV5	92.011	62.4899	86.2649	60.0145	83.0357	71.1496
YCL059C	KRR1	104.842	52.1382	135.301	67.237	241.432	145.661
YCL061C	MRC1	28.6904	14.6939	24.6406	21.595	34.8077	22.4367
YCL063W	VAC17	78.9708	28.1242	65.998	23.9756	69.2228	26.522
YCL064C	CHA1	35.3824	50.0115	67.6944	112.498	85.326	178.977
YCR002C	CDC10	268.976	185.642	245.653	184.201	226.751	177.947
YCR003W	MRPL32	325.242	146.128	227.508	153.304	391.337	355.106
YCR004C	YCP4	362.26	303.411	251.962	353.962	167.613	227.547
YCR005C	CIT2	60.2084	35.7944	35.8128	21.2543	101.284	57.9542
YCR007C	YCR007C	17.1164	39.9922	16.3032	38.5332	17.8886	30.6225
YCR008W	SAT4	142.902	148.657	138.217	110.816	149.45	128.736
YCR009C	RVS161	461.277	538.425	392.02	460.132	386.863	472.815
YCR010C	ADY2	35.6332	53.048	35.297	43.9339	29.6689	50.6386
YCR011C	ADP1	67.5606	118.402	54.2051	81.417	57.6911	114.642
YCR012W	PGK1	5465.17	12098.5	5265.68	9793.93	3002.08	6320.68
YCR014C	POL4	22.6147	19.7847	23.3441	26.2991	32.8807	41.3928
YCR015C	CTO1	101.513	109.107	90.0603	116.699	122.769	206.853
YCR016W	YCR016W	165.871	79.5104	182.551	89.7631	300.998	151.296
YCR017C	CWH43	166.01	124.405	151.895	113.665	99.7676	98.658
YCR018C	SRD1	443.11	936.298	533.769	776.782	426.381	499.584
YCR019W	MAK32	41.0913	68.5126	43.1025	67.846	56.9462	64.1367
YCR020C	PET18	15.5521	26.0098	17.8501	21.4961	17.9439	24.1657
YCR020C-A	MAK31	784.946	440.649	876.316	364.96	741.199	685.4
YCR020W-B	HTL1	648.259	420.352	780.116	490.125	1166.21	1067.87
YCR021C	HSP30	20.2358	2935.95	31.6329	1090.42	27.8631	2541.48
YCR023C	YCR023C	58.9332	59.5016	54.2513	40.6386	47.0422	42.2511
YCR024C	SLM5	85.3857	88.9901	58.4935	84.1061	56.4668	68.3872
YCR024C-A	PMP1	3099.45	1526.23	3891.16	4194.73	4948.89	2499.62
YCR024C-B	YCR024C-B	4942.97	2348.83	4826.18	3351.93	6131.94	2334.45
YCR026C	NPP1	44.4023	54.4307	47.7374	64.352	58.8142	65.1216
YCR027C	RHB1	125.896	116.827	113.679	94.424	130.819	114.155
YCR028C	FEN2	93.8065	69.5514	93.3621	57.1017	78.8892	58.077
YCR028C-A	RIM1	978.955	533.284	893.513	530.792	924.662	633.788
YCR030C	SYP1	94.4679	139.643	69.5528	97.0438	45.2981	91.6992
YCR031C	RPS14A	5900.44	1379.37	6167.01	1017.67	4449.97	1897.25
YCR032W	BPH1	141.088	115.526	155.352	216.708	177.239	155.201
YCR033W	SNT1	61.961	53.1433	58.6904	48.5286	72.3328	47.2224
YCR034W	ELO2	492.357	146.766	511.908	134.117	368.967	167.239
YCR035C	RRP43	77.4864	105.696	98.6176	137.817	110.396	134.666
YCR036W	RBK1	170.623	323.592	166.465	401.672	126.846	261.81
YCR037C	PHO87	48.4529	65.8393	47.1678	72.9559	65.6401	72.3765
YCR038C	BUD5	14.4941	16.7261	12.7781	17.4189	14.3535	17.4129
YCR042C	TAF2	56.4099	53.86	56.4674	69.5122	63.1895	65.0446
YCR043C	YCR043C	521.944	367.259	569.197	340.695	418.994	268.997
YCR044C	PER1	217.67	183.552	180.27	122.024	150.507	174.737
YCR045C	RRT12	37.8443	26.2974	35.6601	26.455	36.7031	23.5443
YCR046C	IMG1	342.86	202.472	281.172	200.621	215.827	189.104
YCR047C	BUD23	181.206	76.3903	215.488	86.1254	287.775	85.4769
YCR048W	ARE1	72.1671	67.4023	65.8633	57.2305	48.3573	48.0182
YCR050C	YCR050C	43.0282	31.3337	34.3233	38.8806	29.6303	28.8899
YCR051W	YCR051W	178.361	69.9454	225.177	93.7434	206.107	79.8592
YCR052W	RSC6	71.2321	43.7731	58.8164	45.5562	59.9736	47.0293
YCR053W	THR4	357.781	213.749	324.894	150.87	318.322	237.398
YCR054C	CTR86	33.0337	27.8654	38.5681	26.3783	52.8587	37.1609
YCR057C	PWP2	93.0207	45.3081	116.37	48.2232	166.069	65.1088
YCR059C	YIH1	145.112	57.4071	142.613	66.5725	127.036	76.7994
YCR060W	TAH1	212.636	165.711	255.499	214.856	278.766	333.867
YCR061W	YCR061W	38.2069	49.3737	24.03	41.1868	17.0105	39.3119
YCR063W	BUD31	39.6369	41.7328	40.0921	45.6492	49.3626	44.07
YCR065W	HCM1	69.3492	38.9001	54.4983	38.6074	52.4878	34.3966
YCR066W	RAD18	16.4681	19.9559	16.9907	20.3501	18.9634	26.5531
YCR067C	SED4	105.85	96.9011	85.0723	96.1175	77.226	80.6205
YCR068W	ATG15	38.3842	77.3144	27.2975	78.6235	26.4701	57.8015
YCR069W	CPR4	300.515	347.208	235.416	317.432	211.505	243.048
YCR071C	IMG2	407.882	236.495	295.857	195.146	341.604	283.255
YCR072C	RSA4	68.7827	30.5836	81.8527	33.8954	101.629	41.6542
YCR073C	SSK22	20.2624	21.7166	22.4508	38.2817	19.6896	19.8215
YCR073W-A	SOL2	44.8996	77.0174	37.1997	68.1176	28.5294	48.0374
YCR075C	ERS1	66.3821	39.4175	54.046	40.0058	37.2095	48.6292
YCR075W-A	EGO2	309.693	306.393	356.261	354.82	282.703	286.044
YCR076C	FUB1	68.0991	97.9557	65.1758	122.995	67.4704	154.232
YCR077C	PAT1	145.632	86.8058	107.664	73.7618	122.965	79.1927
YCR079W	PTC6	77.6219	125.276	62.5974	141.189	95.1039	168.561
YCR081W	SRB8	714.898	857.52	815.632	1046.36	1243.88	1131.28
YCR082W	AHC2	533.889	1074.66	586.666	1288.57	653.222	1426.47
YCR083W	TRX3	190.056	416.903	155.826	442.976	110.548	254.068
YCR084C	TUP1	363.712	218.373	259.444	192.554	217.512	150.665
YCR086W	CSM1	60.2003	51.2049	56.1663	54.3024	53.7184	45.7405
YCR087C-A	YCR087C-A	384.997	154.797	517.147	191.495	722.445	261.178
YCR088W	ABP1	79.6037	87.2291	56.6334	77.2234	37.349	63.8686
YCR089W	FIG2	24.97	19.0745	21.004	19.8487	20.026	17.2601
YCR090C	YCR090C	251.318	221.253	251.801	228.775	352.217	407.319
YCR091W	KIN82	940.185	1398.74	324.173	1476.79	399.41	1939.02
YCR092C	MSH3	19.5517	20.0881	20.017	18.4023	20.4456	18.9157
YCR093W	CDC39	32.9221	29.8412	32.8848	29.3127	36.2942	27.1937
YCR094W	CDC50	180.023	189.921	223.516	211.761	156.573	190.031
YCR095C	OCA4	65.7136	78.1645	69.6815	82.854	93.6842	101.547
YCR095W-A	YCR095W-A	64.5026	60.2201	13.9063	16.9762	35.067	31.3072
YCR097W	HMRA1	309.522	480.65	318.772	720.461	573.82	916.514
YCR098C	GIT1	97.0059	258.69	42.3282	186.111	13.3035	54.7452
YCR099C	YCR099C	61.264	77.5041	61.0929	129.376	48.2778	51.1731
YCR100C	YCR100C	33.6832	38.3277	36.2396	83.545	33.3316	28.2935
YCR101C	YCR101C	37.8332	59.326	58.2047	106.822	36.4434	44.867
YCR102C	YCR102C	9.37458	5.65748	6.69976	8.22422	8.30645	8.58898
YCR105W	ADH7	37.7457	45.2479	32.2346	40.9345	39.4153	48.0145
YCR106W	RDS1	313.804	251.487	293.44	301.52	339.175	292.865
YCR107W	AAD3	17.8301	13.5618	16.7894	12.6057	16.8208	11.4115
YCR108C	YCR108C	54.8646	10.2444	29.5711	38.5057	29.8272	31.0674
YDL001W	RMD1	47.3534	37.57	55.6264	42.2655	72.1391	49.5311
YDL002C	NHP10	177.537	163.906	163.592	146.787	218.412	234.914
YDL003W	MCD1	98.5516	20.0332	81.7066	48.4567	118.334	40.7601
YDL004W	ATP16	592.927	321.577	505.228	274.968	453.396	336.165
YDL005C	MED2	96.9528	103.285	81.7432	88.4731	134.007	112.286
YDL006W	PTC1	74.8884	115.03	84.3649	102.296	89.3244	112.854
YDL007W	RPT2	281.827	337.435	269.43	354.156	355.962	449.015
YDL008W	APC11	184.711	144.106	177.816	138.936	219.319	178.654
YDL010W	GRX6	116.648	102.337	114.895	104.993	109.909	103.727
YDL012C	YDL012C	1138.3	968.554	1146.16	1167.91	1258.34	824.633
YDL013W	SLX5	40.8868	44.97	44.4368	48.3256	49.9373	45.6025
YDL014W	NOP1	1113.64	274.677	1082.97	203.6	767.247	254.32
YDL015C	TSC13	571.466	439.199	555.78	410.545	467.676	525.416
YDL017W	CDC7	18.715	25.4609	20.3312	27.0873	25.0402	25.9194
YDL018C	ERP3	154.103	127.372	137.262	122.771	139.537	201.412
YDL019C	OSH2	48.9166	77.4655	36.0251	58.682	32.2241	55.8861
YDL020C	RPN4	60.1456	88.5162	80.5302	79.2073	117.748	164.042
YDL021W	GPM2	15.6028	262.929	8.09558	237.129	5.74884	160.782
YDL022W	GPD1	228.225	514.5	153.413	391.181	68.409	250.001
YDL024C	DIA3	3.85347	50.7741	3.60528	60.5321	4.74327	18.2916
YDL025C	RTK1	86.3026	89.7795	38.968	88.5412	37.35	84.4006
YDL027C	MRX9	188.263	447.415	156.458	520.603	203.756	432.959
YDL028C	MPS1	23.7139	19.4653	23.6001	22.5961	25.9331	21.4283
YDL029W	ARP2	157.827	156.72	154.165	156.97	139.341	177.772
YDL030W	PRP9	50.8862	46.2567	57.4175	49.932	87.0848	60.4313
YDL031W	DBP10	54.4084	26.3156	67.6473	33.3071	110.96	45.1854
YDL033C	SLM3	39.3158	28.1559	35.7842	27.8093	37.0197	29.4534
YDL035C	GPR1	37.6144	72.6013	36.9278	73.0236	54.4739	77.1938
YDL036C	PUS9	55.9365	42.8122	64.9789	49.2123	78.8767	60.3322
YDL037C	BSC1	127.538	205.54	878.532	409.623	636.527	239.988
YDL039C	PRM7	1079.96	1843.67	8049.22	3442.41	6336.28	2303.49
YDL040C	NAT1	103.557	53.9966	96.3797	49.4237	96.9427	55.773
YDL042C	SIR2	31.0936	27.7216	38.5841	34.3502	35.9571	26.1599
YDL043C	PRP11	55.8295	52.4863	60.9377	50.7547	69.7061	80.121
YDL044C	MTF2	28.5553	33.7609	27.1524	33.8393	39.5071	43.1728
YDL045C	FAD1	82.324	114.762	76.32	104.411	76.933	110.367
YDL045W-A	MRP10	521.994	452.416	405.018	395.739	414.799	446.197
YDL046W	NPC2	2471.51	1878	1926.83	2128.42	1301.26	1372.43
YDL047W	SIT4	148.32	91.5249	132.575	79.4867	138.245	82.9498
YDL048C	STP4	107.436	126.423	103.419	162.747	81.5226	56.8894
YDL049C	KNH1	22.8073	33.439	22.6809	36.3536	18.6279	29.2336
YDL051W	LHP1	274.486	166.563	336.073	175.916	429.518	217.207
YDL052C	SLC1	325.76	579.635	283.386	390.152	214.915	308.407
YDL053C	PBP4	169.197	150.383	137.074	148.894	135.271	152.548
YDL054C	MCH1	117.027	79.2937	67.8814	68.3687	52.5172	78.78
YDL055C	PSA1	3313.99	2543.4	2736.9	2470.44	2548.45	1656.93
YDL056W	MBP1	29.0382	27.5273	27.9968	33.6518	43.9193	39.4896
YDL057W	YDL057W	21.3867	53.6958	20.0584	81.6212	26.8776	54.0029
YDL058W	USO1	42.7367	45.4161	41.6175	47.6626	53.9069	47.7577
YDL059C	RAD59	19.4407	81.3944	16.3115	131.606	21.1561	71.4171
YDL060W	TSR1	100.401	56.0096	115.443	52.3121	160.654	69.1635
YDL061C	RPS29B	22575.2	5556.97	24631.9	4036.32	13697.9	5550.97
YDL063C	SYO1	79.6223	41.0318	101.903	41.9551	136.764	62.9441
YDL064W	UBC9	227.009	142.266	221.831	136.583	139.333	114.122
YDL065C	PEX19	90.6006	106.979	89.8831	141.613	135.292	200.054
YDL066W	IDP1	140.902	92.0909	121.688	93.1483	130.314	108.976
YDL067C	COX9	7323.55	4482.62	5900.41	3779.59	5046.3	3385.88
YDL069C	CBS1	30.1205	41.3261	29.0685	42.5826	29.3202	42.2283
YDL070W	BDF2	106.935	91.7933	101.067	131.884	158.968	95.504
YDL072C	YET3	857.932	1789.08	766.907	1530.34	431.808	1331.11
YDL073W	YDL073W	40.2002	33.245	43.6084	34.9551	51.6671	38.7958
YDL074C	BRE1	79.3105	52.4688	88.7024	52.5512	93.9579	66.7065
YDL075W	RPL31A	5564.89	1314.36	6179.01	1217.21	6080.78	2496.38
YDL076C	RXT3	133.686	121.461	104.269	117.994	125.485	125.556
YDL077C	VAM6	17.4764	15.7438	16.9584	16.8898	21.5027	21.6382
YDL078C	MDH3	290.601	257.066	223.274	242.784	246.653	277.022
YDL079C	MRK1	30.2273	38.8762	26.2339	28.3269	24.5196	29.545
YDL080C	THI3	38.2759	39.0007	38.6299	43.6115	37.2917	37.8355
YDL081C	RPP1A	9268.78	1963.43	9268.95	1359.08	4928.43	1722.55
YDL082W	RPL13A	2282.63	585.094	2370.43	531.977	2294.42	864.097
YDL083C	RPS16B	3782	810.548	3740.84	592.82	2617.69	895.279
YDL084W	SUB2	441.255	210.559	434.665	179.363	397.795	229.406
YDL085C-A	YDL085C-A	923.407	755.023	1047.71	705.609	1129.79	953.944
YDL085W	NDE2	11.3173	73.3207	7.00426	96.594	5.16217	49.4463
YDL086W	YDL086W	524.526	459.852	404.48	401.4	253.356	317.725
YDL087C	LUC7	26.0249	29.0612	20.4446	27.532	25.5844	23.7357
YDL088C	ASM4	74.3148	81.8182	73.6116	76.7325	95.1387	88.8166
YDL089W	NUR1	66.1239	172.141	78.8285	169.637	79.3921	141.423
YDL090C	RAM1	43.0753	33.0633	45.6316	29.1102	40.6165	32.8976
YDL091C	UBX3	46.1766	82.2236	43.5928	75.7397	45.6836	87.4861
YDL092W	SRP14	613.714	572.783	612.084	668.58	936.476	937.697
YDL093W	PMT5	37.1319	42.6519	33.1181	38.8985	29.8421	28.0817
YDL095W	PMT1	240.79	365.789	206.739	281.5	206.814	249.39
YDL097C	RPN6	224.299	272.913	208.569	269.15	200.32	263.418
YDL098C	SNU23	51.1412	70.7684	62.6803	89.4854	87.5984	120.596
YDL099W	BUG1	159.339	209.532	135.11	187.283	188.623	263.006
YDL100C	GET3	313.851	383.503	325.043	442.098	336.085	369.363
YDL101C	DUN1	46.7598	34.748	44.4156	54.2972	46.1682	45.7414
YDL102W	POL3	22.6731	16.369	24.1339	17.8926	28.8808	17.8562
YDL103C	QRI1	71.6131	57.9294	66.591	71.1815	74.4414	90.1459
YDL104C	QRI7	31.5027	27.4648	26.5678	28.2873	35.6802	34.0283
YDL105W	NSE4	25.0988	17.4604	25.8977	22.2331	29.2899	20.1454
YDL106C	PHO2	37.0372	41.7757	31.5451	39.932	32.5984	37.8862
YDL107W	MSS2	51.9504	57.7345	41.296	64.2745	60.6677	97.2912
YDL108W	KIN28	59.9184	64.7696	64.7326	63.3574	70.5906	72.2774
YDL109C	YDL109C	11.388	18.8025	10.225	19.5043	11.8946	14.7087
YDL110C	TMA17	300.969	815.75	203.285	1122.82	165.003	666.293
YDL111C	RRP42	229.687	219.557	240.827	199.898	259.965	218.527
YDL112W	TRM3	52.5769	23.8555	57.9587	22.6848	70.6785	29.8362
YDL113C	ATG20	112.29	170.617	103.379	179.149	98.8906	167.397
YDL115C	IWR1	77.5549	119.979	76.1245	109.723	85.7113	125.297
YDL116W	NUP84	58.782	50.0259	55.0106	47.0501	72.4271	61.7681
YDL117W	CYK3	52.0489	48.9813	57.7571	55.0297	51.4932	47.7457
YDL119C	HEM25	35.8097	55.8203	38.3244	71.6859	41.4175	84.3551
YDL120W	YFH1	163.704	175.595	143.499	178.872	120.886	125.136
YDL121C	YDL121C	751.486	371.862	792.666	386.519	1181.91	799.268
YDL122W	UBP1	97.8982	88.3733	104.697	105.307	146.666	114.859
YDL123W	SNA4	284.499	307.043	230.184	315.041	195.424	180.021
YDL124W	YDL124W	422.356	2585.31	248.657	2196.66	91.9455	1213.08
YDL125C	HNT1	657.239	1260.3	696.812	1148.74	506.283	682.945
YDL126C	CDC48	263.991	287.719	225.257	298.303	221.888	264.558
YDL127W	PCL2	80.2798	55.2452	74.256	73.6093	69.9246	57.5569
YDL128W	VCX1	378.023	335.387	331.609	275.836	232.795	248.259
YDL129W	YDL129W	57.8132	23.1882	59.2954	23.3898	75.9056	23.7809
YDL130W	RPP1B	7731.06	1282.47	8232.84	1063.32	5010.34	1962.49
YDL130W-A	STF1	1536.26	4196.72	686.736	4864.85	475.025	3048.75
YDL131W	LYS21	134.853	72.8975	167.134	70.2789	113.453	71.1631
YDL132W	CDC53	65.8949	104.67	62.1229	111.451	73.9577	101.105
YDL133W	SRF1	58.119	64.7861	57.3585	70.0755	67.6637	68.9234
YDL134C	PPH21	160.057	160.981	160.662	161.208	155.006	151.055
YDL135C	RDI1	412.139	308.464	381.262	377.095	491.309	542.235
YDL137W	ARF2	913.854	756.159	768.177	746.493	633.113	715.154
YDL138W	RGT2	27.7591	43.4275	30.5195	52.9551	36.8363	33.03
YDL139C	SCM3	38.7358	40.4452	43.447	58.649	48.8748	52.7129
YDL140C	RPO21	128.82	121.509	103.321	90.0176	90.6794	77.1243
YDL141W	BPL1	49.3361	39.6346	44.9778	33.1007	36.4633	30.034
YDL142C	CRD1	54.7909	63.1891	52.9221	71.1477	63.6355	93.1922
YDL143W	CCT4	248.535	164.444	235.227	154.524	255.91	164.588
YDL144C	YDL144C	139.301	159.903	138.385	167.134	131.674	161.872
YDL145C	COP1	176.654	120.536	164.092	122.007	173.945	113.675
YDL146W	LDB17	30.9921	135.516	29.6447	103.869	17.3821	50.9664
YDL147W	RPN5	311.645	406.88	302.217	449.866	342.134	516.117
YDL148C	NOP14	62.0218	34.3535	70.8489	39.018	123.012	67.7693
YDL149W	ATG9	26.8467	75.7705	25.8575	69.1691	18.8817	54.3878
YDL150W	RPC53	103.738	69.5252	114.528	70.6316	165.81	102.453
YDL153C	SAS10	122.415	60.5602	136.971	67.2309	243.734	134.689
YDL154W	MSH5	39.7781	49.1665	43.4131	45.41	54.3524	73.3872
YDL155W	CLB3	60.0026	50.3158	62.3924	49.7511	63.8279	48.994
YDL156W	CMR1	15.2065	11.4973	14.1918	14.3254	15.9361	12.0534
YDL157C	YDL157C	410.414	240.305	386.323	231.211	454.446	399.495
YDL159W	STE7	24.047	31.1025	25.3276	32.7323	26.1588	26.6427
YDL160C	DHH1	74.9319	98.0904	59.7486	82.0789	64.8433	79.5433
YDL160C-A	MHF2	253.893	218.584	252.383	225.405	331.987	257.037
YDL161W	ENT1	212.999	238.017	203.534	255.801	267.633	320.295
YDL164C	CDC9	50.2737	42.5236	46.9085	45.5266	50.5998	35.6078
YDL165W	CDC36	139.431	125.326	136.241	146.763	147.564	176.92
YDL166C	FAP7	164.345	102.803	190.757	120.39	240.137	169.662
YDL167C	NRP1	136.241	71.1035	145.171	68.0247	191.937	84.5244
YDL168W	SFA1	107.754	148.417	109.997	131.644	124.14	144.813
YDL169C	UGX2	34.3226	136.783	17.0026	207.755	18.3174	77.8135
YDL170W	UGA3	109.997	139.707	95.9495	122.359	92.0796	117.215
YDL171C	GLT1	60.4919	25.94	57.5446	33.4737	52.6009	22.9619
YDL173W	PAR32	140.834	108.645	116.376	161.077	204.48	207.72
YDL174C	DLD1	91.7761	82.4704	82.9759	76.5848	91.0588	76.3767
YDL175C	AIR2	19.9692	24.1773	22.9529	21.6587	25.2375	23.6023
YDL176W	YDL176W	34.4069	32.6984	33.7081	28.5319	29.6034	28.0905
YDL177C	YDL177C	101.642	114.472	108.752	130.439	129.243	131.585
YDL178W	DLD2	222.441	113.412	154.607	95.8403	217.732	159.416
YDL179W	PCL9	186.551	134.1	166.728	132.899	154.25	81.8604
YDL180W	YDL180W	64.547	76.5206	68.8816	67.5597	60.4796	83.7945
YDL181W	INH1	1633.32	1130.59	1035.87	826.447	1230.31	1136.62
YDL182W	LYS20	72.4485	24.5234	225.971	78.9335	64.0218	21.8351
YDL183C	YDL183C	20.4664	18.643	24.3421	17.8458	19.6717	21.236
YDL185W	VMA1	266.622	209.558	223.726	184.333	150.531	169.228
YDL186W	YDL186W	17.9785	26.1716	16.9921	18.6128	11.1946	18.3344
YDL188C	PPH22	141.257	114.072	131.819	105.602	112.579	103.847
YDL189W	RBS1	76.5549	44.328	60.7953	37.6529	56.8574	37.1569
YDL190C	UFD2	114.25	121.067	112.506	129.135	126.997	151.101
YDL192W	ARF1	817.075	499.406	855.408	455.841	768.858	602.831
YDL193W	NUS1	48.5537	137.957	43.9585	99.6686	44.2211	89.5904
YDL194W	SNF3	25.6412	31.4496	21.658	36.046	24.5375	25.9133
YDL195W	SEC31	159.447	168.447	122.955	135.901	120.38	128.888
YDL197C	ASF2	29.2381	28.6902	30.1282	26.8108	32.9155	26.6151
YDL198C	GGC1	731.661	308.895	481.88	235.57	362.081	323.58
YDL199C	YDL199C	10.4079	27.0199	9.32693	25.192	10.2258	24.6088
YDL200C	MGT1	75.4686	85.4383	74.0236	115.715	95.7335	185.128
YDL201W	TRM8	138.5	112.09	166.974	90.3874	148.64	95.9265
YDL202W	MRPL11	177.939	65.4608	121.561	60.6599	152.187	86.1508
YDL203C	ACK1	112.925	89.2431	94.7975	88.544	99.0961	81.8283
YDL204W	RTN2	55.4101	1090.84	25.5621	546.933	24.1128	589.854
YDL205C	HEM3	217.251	156.357	194.156	128.397	270.76	178.382
YDL206W	YDL206W	29.0661	66.7586	28.9054	64.3351	23.6906	49.4595
YDL207W	GLE1	58.5675	50.332	56.107	56.4866	71.4192	53.9151
YDL208W	NHP2	695.574	258.723	823.572	273.368	1126.13	502.115
YDL209C	CWC2	28.786	24.6602	30.4775	30.0345	37.7007	38.741
YDL210W	UGA4	6.39589	9.18653	5.42589	9.06399	5.34944	8.35779
YDL211C	YDL211C	48.6427	42.132	43.9797	55.4535	40.89	31.3143
YDL212W	SHR3	869.582	599.535	849.948	568.858	966.323	973.874
YDL213C	NOP6	216.352	83.0696	255.596	138.077	470.656	200.164
YDL214C	PRR2	22.8807	34.1201	14.3645	26.9441	9.22825	16.067
YDL215C	GDH2	43.0997	58.0735	31.6117	55.9042	35.3146	49.5636
YDL216C	RRI1	54.5319	60.0417	52.7828	64.5772	55.2923	67.417
YDL217C	TIM22	110.369	79.6323	92.8898	63.3018	101.393	85.1189
YDL218W	YDL218W	13.8414	29.0608	12.0174	26.9231	12.9387	18.5431
YDL219W	DTD1	253.506	156.144	269.722	167.906	328.538	303.079
YDL220C	CDC13	33.8382	34.466	28.3993	33.608	28.0646	31.2833
YDL222C	FMP45	32.7279	1011.38	21.7497	408.096	22.8484	651.921
YDL223C	HBT1	17.4065	58.1188	12.1281	36.7187	11.5851	40.399
YDL224C	WHI4	130.587	116.245	105.21	100.607	71.1481	75.4392
YDL225W	SHS1	76.2563	66.4352	72.4655	74.9358	103.408	95.2698
YDL226C	GCS1	170.004	104.75	141.166	92.9961	115.31	84.0033
YDL227C	HO	91.8272	4.44802	92.3134	4.73877	132.366	7.14349
YDL229W	SSB1	1739.47	348.879	1659.43	273.12	1290.54	399.415
YDL230W	PTP1	45.6726	52.5238	43.6255	74.9884	37.8205	48.4951
YDL231C	BRE4	47.0476	35.0762	49.3578	33.166	46.8098	29.4563
YDL232W	OST4	3051.48	3556.68	6129.3	4805.35	3503.35	3587.69
YDL233W	MFG1	11.4324	22.6382	12.1045	20.4874	8.99479	16.9494
YDL234C	GYP7	25.969	42.8848	27.4234	42.6387	22.0504	41.4936
YDL235C	YPD1	455.055	873.675	498.592	1273.47	484.002	794.929
YDL236W	PHO13	155.188	152.597	141.117	149.256	141.071	131.557
YDL237W	AIM6	174.805	186.534	146.112	163.815	120.735	163.562
YDL238C	GUD1	20.6204	54.6096	14.2967	55.8381	13.7945	44.5347
YDL239C	ADY3	36.2968	80.3715	29.6456	73.8655	32.8846	62.9425
YDL240W	LRG1	50.0896	30.9217	48.1193	27.8942	46.7074	30.2602
YDL241W	YDL241W	205.538	44.8657	178.511	37.8864	87.3805	34.9346
YDL243C	AAD4	19.6347	33.3238	14.5776	29.2603	15.7878	22.4049
YDR001C	NTH1	59.195	239.509	47.6515	228.714	42.2356	208.109
YDR002W	YRB1	535.28	351.662	554.484	292.657	474.699	379.187
YDR003W	RCR2	110.413	154.93	95.0039	118.528	98.4522	171.354
YDR003W-A	YDR003W-A	667.348	790.198	649.196	585.458	530.934	1079.69
YDR004W	RAD57	57.3485	62.9209	61.993	80.7025	74.248	86.3783
YDR005C	MAF1	109.127	134.303	93.0723	109.383	93.9647	114.752
YDR006C	SOK1	52.4224	76.4093	54.9785	69.4051	86.2907	73.7412
YDR007W	TRP1	40.3836	48.7342	35.5536	74.0458	35.1791	60.7137
YDR009W	GAL3	21.9602	39.3464	19.1393	52.4888	26.1754	44.8678
YDR011W	SNQ2	61.0409	43.2478	80.7408	62.463	90.1219	43.048
YDR012W	RPL4B	1899.92	483.688	1871.73	391.067	1038.66	507.944
YDR013W	PSF1	70.8374	44.1258	60.0064	47.4021	46.4203	35.1182
YDR014W	RAD61	49.3973	62.9779	49.0052	74.9343	70.0451	77.219
YDR016C	DAD1	344.999	227.319	298.945	210.38	216.619	241.594
YDR017C	KCS1	38.9701	38.185	42.313	40.6181	52.0055	34.0763
YDR018C	YDR018C	16.4821	101.964	14.3587	86.3497	16.0076	85.7545
YDR019C	GCV1	813.095	679.009	131.691	449.589	61.4539	243.595
YDR020C	DAS2	122.761	60.9982	126.437	60.8314	182.998	89.51
YDR021W	FAL1	51.9743	28.858	54.2311	32.5321	77.7192	38.8342
YDR022C	ATG31	75.5731	155.416	53.7503	147.294	39.65	101.155
YDR023W	SES1	428.487	212.647	418.934	185.077	540.905	315.429
YDR025W	RPS11A	2419.5	620.631	2640.18	515.271	1926.35	695.985
YDR026C	NSI1	51.1041	80.0381	52.389	95.7958	63.2803	72.0262
YDR027C	VPS54	33.5053	50.7374	30.8341	52.0917	36.1728	45.2939
YDR028C	REG1	56.8755	78.8597	52.4061	81.7341	55.5561	73.301
YDR030C	RAD28	19.5076	27.7908	17.7185	32.1677	24.6149	31.0933
YDR031W	MIX14	162.889	341.213	116.912	254.924	129.05	494.293
YDR032C	PST2	824.461	1239.42	570.539	1351.8	345.563	945.541
YDR033W	MRH1	2358.26	1296.63	2050.93	1538.57	1275.66	874.271
YDR034C	LYS14	43.2	33.6728	54.7847	46.7339	47.2068	37.2884
YDR034C-A	YDR034C-A	10275.1	21586.4	12203.5	21604.4	11618.7	16514.1
YDR035W	ARO3	266.4	174.612	228.76	149.796	253.69	231.388
YDR036C	EHD3	68.9451	41.5525	57.7054	39.3626	84.2203	49.4067
YDR037W	KRS1	628.138	259.119	638.122	227.235	777.127	412.533
YDR041W	RSM10	202.872	106.35	151.314	93.7524	192.927	210.279
YDR042C	YDR042C	20.1258	16.2994	20.388	11.9126	45.0399	35.1109
YDR043C	NRG1	39.4563	118.506	45.541	172.313	35.838	94.1962
YDR044W	HEM13	201.648	145.612	164.418	125.691	93.9623	76.4493
YDR045C	RPC11	326.856	197.065	335.887	161.01	417.592	330.658
YDR046C	BAP3	213.404	157.457	187.98	157.459	214.985	171.031
YDR047W	HEM12	225.619	169.849	203.717	128.196	188.141	127.805
YDR049W	VMS1	40.8474	31.3172	37.4168	37.2723	55.4037	44.2071
YDR050C	TPI1	4439.51	4612.18	3608.07	3641.16	2501.55	3049.7
YDR051C	DET1	150.97	135.054	155.687	141.285	192.936	212.209
YDR052C	DBF4	75.0721	63.07	70.6266	68.3701	81.6876	60.7875
YDR054C	CDC34	190.872	225.252	211.717	237.905	211.62	226.717
YDR055W	PST1	501.523	2850.17	748.88	4649.27	300.201	1238.12
YDR056C	EMC10	323.689	292.017	308.689	247.178	233.695	299.043
YDR057W	YOS9	51.265	65.0448	51.9257	62.5654	57.3099	77.214
YDR058C	TGL2	30.8542	80.483	29.0025	83.0988	37.4617	101.034
YDR059C	UBC5	240.69	398.323	196.653	528.832	175.25	376.235
YDR060W	MAK21	115.207	51.8944	128.887	63.6923	203.222	91.7638
YDR061W	YDR061W	58.5486	48.4421	50.5196	49.0734	60.8453	75.3895
YDR062W	LCB2	231.672	158.978	232.945	129.802	228.436	157.206
YDR063W	AIM7	520.237	609.042	464.299	505.685	362.112	535.204
YDR064W	RPS13	5749.12	1168.89	5788.29	905.07	4238.66	1296.06
YDR065W	RRG1	185.563	205.079	265.358	376.999	249.638	420.289
YDR066C	RTR2	53.8794	67.8521	54.9826	61.4482	54.5692	78.1626
YDR067C	OCA6	112.922	137.586	91.4008	141.324	95.9668	133.746
YDR068W	DOS2	187.801	188.213	154.004	207.571	229.69	305.091
YDR069C	DOA4	30.7083	101.664	27.4697	94.3324	34.3263	71.9384
YDR070C	FMP16	124.328	2613.44	106.889	4016.93	75.3318	849.017
YDR071C	PAA1	641.212	606.145	695.402	657.624	847.874	1059.14
YDR072C	IPT1	131.256	68.3427	148.776	73.9053	104.863	64.6024
YDR073W	SNF11	115.73	105.016	125.628	125.594	103.832	100.709
YDR074W	TPS2	58.2787	138.278	39.9197	86.2061	35.5402	141.116
YDR075W	PPH3	163.373	138.704	166.842	129.146	214.459	148.894
YDR076W	RAD55	22.9086	33.9251	21.8896	46.7581	21.3887	22.1778
YDR077W	SED1	17630.8	30952.2	14693.4	36025.9	4937.2	15339.2
YDR078C	SHU2	10.7276	16.56	11.335	16.3997	15.0132	18.1291
YDR079C-A	TFB5	136.048	109.582	145.217	138.075	142.608	256.793
YDR079W	PET100	339.57	367.169	265.869	290.772	303.838	370.733
YDR080W	VPS41	56.6655	63.3497	58.3752	71.005	74.2365	98.4685
YDR081C	PDC2	48.3976	33.9009	44.7651	39.1769	52.5707	35.0188
YDR082W	STN1	36.2288	38.551	34.9193	42.7912	40.316	40.3307
YDR083W	RRP8	187.623	77.2778	210.578	81.0101	304.966	124.685
YDR084C	TVP23	248.946	224.733	187.862	197.972	152.26	247.994
YDR085C	AFR1	20.8374	64.8289	28.6239	72.3806	10.2057	42.7326
YDR086C	SSS1	1683.23	1313.48	1802.82	1245.3	1430.54	1192.7
YDR087C	RRP1	199.454	123.771	251.812	146.326	325.596	158.643
YDR088C	SLU7	38.973	40.138	37.4594	49.188	76.3422	78.3228
YDR089W	YDR089W	189.064	131.548	79.2761	94.9915	31.8464	59.8843
YDR090C	YDR090C	95.4339	91.8215	84.9134	89.809	88.9386	87.2697
YDR091C	RLI1	256.513	120.995	281.01	118.184	297.235	139.514
YDR092W	UBC13	552.805	530.334	530.771	662.362	434.159	446.442
YDR093W	DNF2	53.247	39.1745	45.4364	30.1957	34.6983	27.5926
YDR096W	GIS1	90.3962	122.963	77.3871	112.202	92.5228	104.697
YDR097C	MSH6	32.4823	10.4275	29.7881	15.1819	31.5511	13.457
YDR098C	GRX3	326.509	327.789	308.835	378.146	359.591	337.49
YDR099W	BMH2	736.934	668.4	616.878	661.004	472.629	588.467
YDR100W	TVP15	360.048	355.427	280.777	302.133	246.055	484.02
YDR101C	ARX1	155.126	69.6657	185.215	67.3645	291.57	99.4756
YDR103W	STE5	32.5391	43.2227	33.7762	42.3625	44.2331	44.0426
YDR104C	SPO71	84.3395	100.512	84.7942	126.768	90.4776	125.408
YDR105C	TMS1	154.907	195.013	129.633	161.482	109.425	172.84
YDR106W	ARP10	95.1233	139.71	53.9389	227.14	79.0245	200.056
YDR107C	TMN2	68.5152	75.5453	58.55	74.0064	46.7545	56.7584
YDR108W	TRS85	117.649	124.632	116.787	105.476	132.505	128.492
YDR109C	YDR109C	87.7308	122.218	94.4791	117.617	126.276	103.322
YDR110W	FOB1	45.1216	33.3545	50.5703	37.8756	76.6434	48.2438
YDR111C	ALT2	30.1666	15.9573	40.3824	19.5395	53.6134	14.1685
YDR113C	PDS1	46.2471	20.9298	42.5215	28.5949	46.0577	21.1507
YDR114C	YDR114C	13.455	12.5617	17.9168	6.9435	8.60569	15.366
YDR115W	YDR115W	647.871	443.387	508.932	377.745	556.264	699.86
YDR116C	MRPL1	218.294	110.568	141.961	79.7474	162.132	139.935
YDR117C	TMA64	44.6293	53.4518	49.3116	69.9997	50.6342	51.2653
YDR118W	APC4	18.7306	20.1657	18.236	20.7302	19.6938	24.3919
YDR119W	VBA4	142.539	61.3025	148.902	61.4126	164.83	99.8874
YDR119W-A	COX26	375.528	649.771	331.942	748.943	56.7102	340.233
YDR120C	TRM1	96.329	34.3653	120.425	43.1549	192.171	64.4864
YDR121W	DPB4	123.689	67.0331	131.642	77.4929	141.923	87.4643
YDR122W	KIN1	121.459	194.493	70.9728	161.065	68.8545	141.715
YDR123C	INO2	67.8384	129.634	79.9	120.576	72.213	94.2788
YDR124W	YDR124W	17.4434	26.3586	19.5142	26.504	14.1758	20.8507
YDR125C	ECM18	12.5496	18.4008	14.5254	20.008	12.6831	22.1259
YDR126W	SWF1	37.8178	33.4721	36.9144	32.3412	40.5798	34.7836
YDR127W	ARO1	79.7431	61.1401	61.061	43.0132	60.0093	69.854
YDR128W	MTC5	23.9831	22.7046	23.9782	22.5531	23.8628	24.6737
YDR129C	SAC6	204.226	201.832	169.216	147.077	189.42	238.243
YDR130C	FIN1	56.1071	38.1092	48.5191	46.567	59.9788	54.9291
YDR131C	YDR131C	26.524	39.2209	29.1247	47.897	42.4235	51.4683
YDR132C	YDR132C	31.1577	44.7103	27.6668	40.8248	35.8285	36.8147
YDR135C	YCF1	59.9834	66.2387	61.1034	66.916	59.7431	64.7901
YDR137W	RGP1	51.1422	40.1937	54.6248	44.0678	71.2767	63.0032
YDR138W	HPR1	41.4655	29.7051	41.8464	30.8947	48.6898	31.6795
YDR139C	RUB1	1189.29	1106.69	1229.39	1183.84	1313.82	1365.69
YDR140W	MTQ2	145.718	124.358	143.039	129.98	170.85	143.971
YDR141C	DOP1	65.5001	73.754	61.1382	66.6636	67.0977	73.9688
YDR142C	PEX7	52.1454	49.1968	51.4684	45.3957	48.879	41.6566
YDR143C	SAN1	82.0769	73.8767	70.4572	61.7401	68.6698	49.4583
YDR144C	MKC7	172.198	88.2908	194.327	93.0618	200.985	86.8086
YDR145W	TAF12	114.076	78.4239	108.703	85.3335	145.486	103.65
YDR146C	SWI5	59.2692	14.696	54.3714	24.714	61.291	17.7028
YDR147W	EKI1	89.4677	77.0334	99.3266	88.5765	104.568	81.1523
YDR148C	KGD2	168.35	128.116	106.242	115.871	112.197	105.921
YDR150W	NUM1	5765.47	2492.53	7964.16	4291.63	7981.06	4263.3
YDR151C	CTH1	88.4513	145.8	97.1929	103.63	121.337	150.797
YDR152W	GIR2	242.344	185.076	285.526	210.371	366.527	256.193
YDR153C	ENT5	106.287	104.074	104.477	105.207	134.328	113.277
YDR155C	CPR1	7146.71	8051.8	7608.35	9719.07	3182.56	5488.79
YDR156W	RPA14	579.941	397.588	599.585	352.793	335.51	285.831
YDR158W	HOM2	568.656	286.189	504.271	220.15	455.605	432.938
YDR159W	SAC3	64.9801	56.4761	67.5414	60.1286	83.0737	66.5278
YDR160W	SSY1	32.5533	53.9146	28.4246	43.6666	22.4869	31.5777
YDR161W	ACL4	108.958	43.7572	142.455	51.5031	157.567	61.4443
YDR162C	NBP2	122.769	170.756	117.414	204.401	142.144	205.842
YDR163W	CWC15	201.712	254.931	208.893	408.914	286.789	338.22
YDR164C	SEC1	48.2706	44.4544	51.0004	48.5434	54.6928	53.1233
YDR165W	TRM82	124.339	69.0009	151.475	78.7703	216.417	111.38
YDR166C	SEC5	36.0218	46.9445	34.3349	51.5651	38.3922	40.6757
YDR167W	TAF10	148.16	117.067	163.097	110.989	201.115	234.896
YDR168W	CDC37	166.016	291.178	151.601	322.547	232.765	383.05
YDR169C	STB3	65.8213	134.043	45.7145	110.727	58.3158	94.1361
YDR170C	SEC7	30.1862	22.2831	30.7542	21.0099	31.9636	22.5691
YDR171W	HSP42	39.8682	899.504	35.0526	360.507	127.521	2832.5
YDR172W	SUP35	163.075	102.76	162.576	104.457	205.048	111.926
YDR173C	ARG82	22.4039	47.6372	22.279	40.5378	24.8166	34.9328
YDR174W	HMO1	367.137	267.69	345.237	205.142	272.189	232.709
YDR175C	RSM24	163.623	72.1683	109.971	64.6709	130.34	81.3757
YDR176W	NGG1	40.2784	26.5819	34.661	35.9172	62.0272	46.2631
YDR177W	UBC1	238.895	187.646	230.673	213.892	297.52	356.811
YDR178W	SDH4	914.797	845.001	574.789	748.03	453.096	611.681
YDR179C	CSN9	22.6583	17.5067	28.0043	32.2158	59.1132	52.3012
YDR179W-A	NVJ3	37.7221	24.5057	37.2782	30.6209	51.3968	32.6642
YDR180W	SCC2	494.721	431.603	364.901	464.589	742.625	349.804
YDR181C	SAS4	41.9887	53.4592	42.0815	58.9449	58.6397	86.738
YDR182W	CDC1	112.418	115.388	105.423	100.97	111.953	118.565
YDR182W-A	YDR182W-A	87.2203	182.666	83.8561	163.375	104.66	169.715
YDR183W	PLP1	70.4819	94.9592	81.5111	108.184	75.1041	91.2767
YDR184C	ATC1	196.899	172.407	226.654	141.973	287.501	213.954
YDR185C	UPS3	60.2169	78.3188	71.0299	63.0289	84.7901	80.5143
YDR186C	YDR186C	92.3087	155.678	102.78	185.348	151.914	174.891
YDR188W	CCT6	153.042	138.829	161.578	146.332	212.94	145.384
YDR189W	SLY1	224.201	228.098	233.047	271.35	255.246	224.997
YDR190C	RVB1	162.989	114.725	183.496	120.294	239.921	183.705
YDR191W	HST4	23.2566	39.8225	24.0018	37.7405	18.6156	28.1775
YDR192C	NUP42	37.1161	40.9595	38.1201	41.7524	45.4476	42.7886
YDR194C	MSS116	166.134	76.177	131.948	75.1344	222.056	146.133
YDR195W	REF2	40.0732	41.3361	44.7671	54.7803	52.0809	61.9959
YDR196C	CAB5	125.252	143.627	133.713	153.509	96.5291	153.375
YDR197W	CBS2	80.7413	71.269	78.5965	70.533	91.027	94.726
YDR198C	RKM2	54.2056	45.5353	62.8853	51.749	85.4399	63.2205
YDR200C	VPS64	27.4215	28.5558	27.6053	35.5421	34.258	39.942
YDR201W	SPC19	83.8426	79.7756	83.2807	68.0588	69.7107	84.3245
YDR202C	RAV2	43.7734	72.6156	47.6356	73.2511	52.5055	91.8732
YDR204W	COQ4	74.1627	129.57	58.4392	144.963	48.3352	115.726
YDR205W	MSC2	44.6787	52.4712	48.1876	54.8995	42.0233	46.1712
YDR206W	EBS1	89.1079	55.7395	91.3982	50.8244	87.9132	51.083
YDR207C	UME6	24.7774	13.6315	23.067	15.791	36.9557	21.654
YDR208W	MSS4	66.1533	82.1784	63.5705	74.464	70.7777	71.699
YDR210W	YDR210W	1282.19	1962.97	1784.24	3218.73	1180.89	1390.13
YDR211W	GCD6	76.6666	62.2413	88.4974	76.9331	110.583	89.593
YDR212W	TCP1	162.248	130.752	145.505	104.827	138.081	116.374
YDR213W	UPC2	9.58186	11.5456	10.7634	11.0099	12.2179	14.0498
YDR214W	AHA1	470.79	1792.09	412.906	662.234	672.196	3112
YDR216W	ADR1	478.33	932.857	471.677	2420.63	698.321	1265.45
YDR217C	RAD9	18.7005	18.1704	20.549	22.236	31.6248	22.272
YDR218C	SPR28	18.526	54.6828	9.69746	59.6396	11.4162	50.3971
YDR219C	MFB1	40.8745	33.3951	35.0306	34.423	40.178	37.6984
YDR221W	GTB1	47.3003	46.8223	42.7197	46.7369	50.1645	55.1472
YDR222W	YDR222W	45.7382	45.4564	90.849	43.7734	57.4041	47.7049
YDR223W	CRF1	27.7346	57.8006	33.6393	73.4677	23.4872	35.3852
YDR224C	HTB1	3016.65	753.794	3198.83	840.48	2865.73	784.072
YDR225W	HTA1	1380.92	277.542	1177.54	267.394	1219.59	509.991
YDR226W	ADK1	1287.82	530.933	990.484	411.999	780.231	430.236
YDR227W	SIR4	17.7896	14.2819	16.5931	15.889	16.3565	15.577
YDR228C	PCF11	46.577	47.5555	48.133	50.9962	61.1876	56.116
YDR229W	IVY1	35.7536	42.2433	38.1927	53.6593	65.7799	77.3551
YDR231C	COX20	54.573	80.2188	45.9358	98.5031	28.4062	77.3967
YDR232W	HEM1	163.3	92.3633	139.84	84.2415	110.683	74.758
YDR233C	RTN1	2695.95	1877.15	3035.31	1838.71	1526.51	1185.4
YDR234W	LYS4	134.768	41.7164	517.679	199.13	143.915	50.9008
YDR235W	PRP42	41.9448	32.9718	44.6016	36.0635	70.4908	48.4724
YDR236C	FMN1	211.448	363.213	192.995	385.625	192.429	387.459
YDR237W	MRPL7	203.056	112.123	145.679	87.2394	183.8	170.622
YDR238C	SEC26	122.086	136.283	119.062	123.907	116.172	106.132
YDR239C	YDR239C	23.8914	21.4651	22.9168	20.486	21.4846	21.4013
YDR240C	SNU56	30.2159	23.9886	35.504	26.5403	38.4694	27.5353
YDR242W	AMD2	28.3641	33.3837	25.991	35.5315	27.4789	33.4247
YDR243C	PRP28	18.4383	13.675	19.9085	13.9941	29.6763	19.9199
YDR244W	PEX5	32.5231	30.8419	30.0591	29.4308	30.1648	35.4701
YDR245W	MNN10	282.75	170.041	285.239	145.8	292.151	180.906
YDR246W	TRS23	114.482	142.35	124.063	181.669	121.447	149.157
YDR246W-A	YDR246W-A	59.6162	21.6448	41.0577	23.2448	34.5111	12.0565
YDR247W	VHS1	20.1247	12.5876	18.3067	10.9211	17.0815	9.23368
YDR248C	YDR248C	107.918	182.937	98.368	200.316	128.226	219.172
YDR249C	YDR249C	27.0541	30.358	29.9485	31.1284	22.6277	28.4927
YDR251W	PAM1	53.1716	71.6497	46.8781	62.2195	41.3086	56.456
YDR252W	BTT1	64.6031	48.5615	59.6548	41.4649	62.4096	62.0586
YDR253C	MET32	55.3417	129.109	54.0594	200.313	54.1604	96.5021
YDR254W	CHL4	33.8647	38.7207	30.2777	42.4316	28.8433	37.6754
YDR255C	RMD5	27.155	39.7424	22.6052	45.2295	15.0606	35.5298
YDR256C	CTA1	40.1602	35.8736	38.8762	32.0348	33.4322	24.0073
YDR257C	RKM4	33.7679	30.1319	39.3721	36.3081	44.4032	30.3822
YDR258C	HSP78	68.9254	670.387	29.7555	218.036	445.949	2639.72
YDR259C	YAP6	19.6507	34.547	15.9134	64.1543	14.0404	23.5674
YDR260C	SWM1	217.665	151.484	183.627	167.655	161.125	97.7932
YDR261C	EXG2	98.8883	155.576	103.124	171.613	62.4657	84.5005
YDR261C-D	YDR261C-D	10793.3	16703.7	16246.8	17487.5	10220.2	10540.3
YDR262W	YDR262W	149.755	203.468	140.029	165.202	123.21	125.936
YDR263C	DIN7	123.361	166.939	124.298	149.614	113.671	87.4423
YDR264C	AKR1	86.7121	114.629	85.6534	113.339	88.759	124.534
YDR265W	PEX10	46.7529	52.1779	39.649	57.3069	41.8752	56.2231
YDR266C	HEL2	68.1426	64.2245	74.651	76.5355	84.3666	76.2839
YDR267C	CIA1	119.838	62.3079	130.428	67.2035	130.487	74.7747
YDR268W	MSW1	45.5018	36.6102	34.3186	30.8834	38.4471	43.7372
YDR270W	CCC2	14.7816	29.9904	14.8303	27.0077	19.4392	31.0892
YDR272W	GLO2	134.668	305.125	133.944	348.868	175.955	495.742
YDR273W	DON1	7.52149	10.5833	6.02302	10.7933	10.6608	11.8646
YDR275W	BSC2	38.0041	37.2023	41.188	41.159	47.1509	48.5589
YDR276C	PMP3	7472.68	8489.26	8081.37	8250.32	4448.19	5186.61
YDR277C	MTH1	34.4758	9.93125	14.23	7.0085	9.87075	5.21834
YDR279W	RNH202	57.0869	23.0748	55.938	34.3472	70.5034	35.5637
YDR280W	RRP45	212.675	159.337	227.053	178.768	289.979	175.562
YDR281C	PHM6	1941.83	1310.66	1395.66	651.496	1196.09	1013.45
YDR282C	MRX10	34.231	45.5819	29.5493	38.2859	35.7531	58.875
YDR283C	GCN2	53.8957	66.8977	48.9312	74.4929	57.1355	68.5227
YDR284C	DPP1	218.957	216.418	179.939	213.228	145.742	241.305
YDR285W	ZIP1	747.911	1766.79	875.583	2194.45	1166.63	2395.81
YDR286C	YDR286C	99.0152	101.065	76.4669	74.2242	83.021	125.226
YDR287W	INM2	88.428	114.386	74.6501	128.173	68.9898	102.387
YDR288W	NSE3	84.6774	98.8506	91.207	107.015	137.461	159.903
YDR289C	RTT103	38.6006	47.5402	36.5099	52.8919	52.8877	66.8089
YDR291W	HRQ1	94.4642	114.969	101.811	120.17	116.356	113.367
YDR292C	SRP101	145.493	93.9498	147.86	88.0611	168.413	102.952
YDR293C	SSD1	102.889	160.611	94.6144	184.439	87.6672	129.058
YDR294C	DPL1	94.6392	133.786	92.2262	123.465	80.4335	124.224
YDR295C	HDA2	18.9731	28.389	20.1503	31.5247	24.8984	32.0557
YDR296W	MHR1	179.367	89.8977	127.318	90.9453	166.42	142.196
YDR297W	SUR2	283.373	169.481	282.246	156.902	217.675	115.28
YDR298C	ATP5	1244.29	596.33	984.381	502.974	871.124	540.177
YDR299W	BFR2	96.3427	57.7008	104.176	61.9118	158.491	95.7199
YDR300C	PRO1	83.7365	51.7707	89.895	52.1872	108.578	63.606
YDR301W	CFT1	38.6325	36.255	38.9162	35.13	43.2937	34.6296
YDR302W	GPI11	256.023	212.854	249.908	216.409	320.782	346.522
YDR303C	RSC3	38.1277	48.379	39.7065	48.3134	46.1603	46.0414
YDR304C	CPR5	859.244	1007.82	825.999	899.268	737.592	881.039
YDR305C	HNT2	85.0098	87.1905	103.77	93.0652	122.048	144.412
YDR306C	YDR306C	41.6592	51.2493	39.233	50.9285	41.3579	54.0168
YDR307W	PMT7	65.3	72.0151	59.6963	73.948	74.8329	106.121
YDR308C	SRB7	257.987	210.267	257.85	205.249	330.548	316.843
YDR309C	GIC2	210.927	95.1527	243.865	169.52	267.388	110.087
YDR310C	SUM1	50.0169	52.9473	50.4413	56.1035	54.5885	48.4849
YDR311W	TFB1	39.6079	51.7644	38.9348	46.9918	43.0263	43.7274
YDR312W	SSF2	73.1261	33.8273	76.5142	43.3357	113.896	64.1952
YDR313C	PIB1	62.1235	93.9503	47.2439	58.0466	50.4418	70.849
YDR314C	RAD34	11.9306	13.1177	9.5659	12.8021	9.64875	11.5056
YDR315C	IPK1	35.2135	59.8728	38.4618	70.0366	37.6821	67.9755
YDR316W	OMS1	99.4031	61.8944	65.8113	69.5558	134.396	126.152
YDR317W	HIM1	22.4187	28.5017	20.097	29.0314	25.7189	37.4395
YDR318W	MCM21	39.3029	42.8342	43.8201	48.0545	45.4796	53.3382
YDR319C	YFT2	80.7259	93.2799	80.2625	102.005	86.3743	111.62
YDR320C	SWA2	31.4079	77.0384	25.7357	57.5326	21.3376	41.9797
YDR320C-A	DAD4	1530.96	2070.87	1806.01	2690.19	2334.93	3602.21
YDR321W	ASP1	231.85	106.172	238.374	86.4598	159.707	77.9422
YDR322C-A	TIM11	1436.46	1172.74	1376.34	1400.27	1630.36	1963.17
YDR322W	MRPL35	125.31	70.1339	91.3691	54.7068	103.051	86.0343
YDR323C	PEP7	56.9993	48.0142	43.5379	48.9302	52.0818	64.1014
YDR324C	UTP4	127.53	66.5483	160.289	79.0439	229.443	98.3897
YDR325W	YCG1	71.4198	95.1098	122.99	129.832	87.6074	128.054
YDR326C	YSP2	45.448	41.9321	44.9751	40.4291	43.6191	38.9331
YDR328C	SKP1	483.282	492.171	494.927	573.263	678.948	981.329
YDR329C	PEX3	74.0014	73.797	66.7581	74.4593	86.3055	109.157
YDR330W	UBX5	35.8165	51.1943	31.6207	58.2238	32.6799	49.834
YDR331W	GPI8	98.0216	98.3064	105.469	86.6276	107.242	92.3078
YDR332W	IRC3	15.2249	20.6162	17.6662	21.2186	20.502	21.0674
YDR333C	RQC1	39.6374	34.9661	40.321	32.6252	50.4027	37.6575
YDR334W	SWR1	25.1787	24.9855	23.5557	23.6928	26.8588	27.6245
YDR335W	MSN5	40.959	54.9119	45.0561	51.3193	43.141	53.6182
YDR336W	MRX8	47.2435	40.8934	51.9455	41.9199	57.6667	65.242
YDR337W	MRPS28	190.342	89.5144	122.391	73.2892	147.663	132.404
YDR338C	YDR338C	21.6035	24.4104	21.9038	25.1039	25.1002	23.7672
YDR339C	FCF1	392.304	256.431	458.721	289.203	508.651	328.746
YDR341C	YDR341C	327.894	135.456	306.77	102.861	377.902	199.236
YDR345C	HXT3	656.455	51.8268	495.565	40.5747	483.828	22.5779
YDR346C	SVF1	288.6	217.117	276.494	192.559	339.615	200.974
YDR347W	MRP1	344.466	197.404	253.729	144.949	232.021	184.563
YDR348C	PAL1	92.1199	101.063	95.3609	116.664	106.203	89.1331
YDR349C	YPS7	165.092	144.137	167.678	151.634	139.051	118.571
YDR350C	ATP22	33.3787	50.2156	41.7819	58.0312	38.8227	54.6597
YDR351W	SBE2	37.1061	54.625	43.6906	65.7883	41.1671	53.548
YDR352W	YPQ2	119.242	83.9861	117.771	78.2123	124.458	98.9184
YDR353W	TRR1	602.111	318.248	506.943	310.375	523.826	338.999
YDR354W	TRP4	248.524	96.5652	210.504	106.786	182.747	120.68
YDR356W	SPC110	20.3215	15.9916	16.0089	14.0672	18.8681	14.2479
YDR357C	CNL1	443.625	933.524	536.57	1774.19	587.83	1323.02
YDR358W	GGA1	14.932	39.0692	15.3443	48.1433	11.8061	44.8027
YDR359C	EAF1	28.9763	27.1469	23.7266	27.8324	27.5998	24.4769
YDR361C	BCP1	151.576	36.6601	168.275	41.8724	238.766	74.0376
YDR362C	TFC6	31.4637	53.3522	32.4278	48.8323	33.5848	37.7023
YDR363W	ESC2	40.4531	52.5699	36.0251	48.2832	43.7831	40.4067
YDR363W-A	SEM1	2294.13	3542.24	2228.93	3956.59	3117.27	4573.53
YDR364C	CDC40	65.5159	78.5795	73.2924	88.4425	91.887	81.241
YDR365C	ESF1	121.856	44.5023	120.955	54.7816	208.908	80.5985
YDR366C	YDR366C	336.33	511.677	383.863	570.949	367.672	527.938
YDR367W	KEI1	163.119	104.978	175.288	67.043	123.827	88.49
YDR368W	YPR1	163.66	183.4	151.236	197.901	113.295	136.76
YDR369C	XRS2	29.8636	47.8818	27.6461	60.1921	36.5436	61.1989
YDR370C	DXO1	63.7631	43.8265	69.4652	48.3563	78.6966	61.6223
YDR371W	CTS2	48.4199	70.257	53.4098	69.8806	69.6537	112.037
YDR372C	VPS74	270.814	193.19	268.169	199.989	274.172	270.751
YDR373W	FRQ1	314.529	328.361	281.125	343.631	315.912	381.239
YDR374C	PHO92	117.008	345.924	105.109	855.413	61.8444	402.271
YDR374W-A	WIP1	366.97	637.374	322.476	672.304	314.072	717.453
YDR375C	BCS1	84.7936	36.47	61.1701	36.909	67.0331	47.4822
YDR376W	ARH1	73.3017	82.9089	67.1318	85.3353	65.4289	77.0428
YDR377W	ATP17	1809.46	1348.19	1513.88	1251.08	1968.94	1907.86
YDR378C	LSM6	771.257	566.587	897.93	631.589	900.554	756.87
YDR379C-A	SDH6	521.976	1668.44	337.401	1754.42	249.639	1639.71
YDR379W	RGA2	46.5044	57.3563	41.3461	89.7732	58.5148	78.387
YDR380W	ARO10	66.3734	63.4954	36.0095	27.4623	64.418	176.883
YDR381C-A	YDR381C-A	385.471	350.17	307.681	430.34	512.37	836.262
YDR381W	YRA1	852.884	429.449	791.89	454.608	1000.74	610.295
YDR382W	RPP2B	9477.28	1698.41	10881.3	1484.56	8172.76	2440.96
YDR383C	NKP1	33.3085	37.5756	30.3486	52.7025	43.2944	54.9315
YDR384C	ATO3	66.7679	20.074	74.1694	20.9148	73.0071	20.9941
YDR386W	MUS81	13.9545	18.2873	15.135	23.7066	18.5255	22.4379
YDR387C	YDR387C	49.4369	60.0859	43.9549	49.7736	30.2448	41.0148
YDR388W	RVS167	181.797	189.705	132.869	161.198	131.718	165.646
YDR389W	SAC7	67.0458	54.7116	68.0067	55.902	70.8622	57.0747
YDR390C	UBA2	67.379	46.5853	78.7071	59.1829	112.658	76.8564
YDR391C	YDR391C	86.3581	204.013	76.1083	197.166	67.4095	179.445
YDR392W	SPT3	46.2182	61.5609	48.4396	59.3471	57.3121	72.8985
YDR393W	SHE9	74.3442	51.7634	62.3848	49.0669	80.8933	81.3868
YDR394W	RPT3	223.542	264.133	214.313	278.931	220.519	280.13
YDR395W	SXM1	123.212	74.8249	139.292	72.9686	156.411	91.8445
YDR397C	NCB2	291.129	163.73	314.931	196.81	357.348	283.567
YDR398W	UTP5	131.518	75.9386	157.234	92.7557	237.018	110.627
YDR399W	HPT1	1856.04	607.163	1587.52	388.995	1552.45	559.662
YDR400W	URH1	156.613	269.461	140.29	261.393	126.582	126.873
YDR402C	DIT2	165.723	270.657	139.811	213.258	208.69	306.033
YDR403W	DIT1	62.7732	113.519	59.0355	147.547	151.133	216.921
YDR404C	RPB7	630.947	445.787	550.812	359.619	389.926	321.397
YDR405W	MRP20	78.8759	43.6244	62.4314	55.7862	53.4763	46.7229
YDR406W	PDR15	16.1445	29.0341	10.535	26.2202	9.71401	16.6379
YDR407C	TRS120	28.0064	33.103	29.9309	37.931	31.4165	34.4539
YDR408C	ADE8	637.94	217.388	414.552	164.023	238.922	143.768
YDR409W	SIZ1	64.3891	56.5409	49.9057	47.442	83.8423	98.7799
YDR410C	STE14	154.537	147.515	153.696	141.74	150.941	171.013
YDR411C	DFM1	241.131	462.343	208.115	441.078	176.565	310.163
YDR412W	RRP17	291.792	156.915	308.318	152.916	432.786	181.85
YDR414C	ERD1	107.171	86.2188	99.721	80.6014	95.3375	118.906
YDR415C	YDR415C	88.4502	107.031	85.4868	88.6751	111.41	129.313
YDR416W	SYF1	20.8142	22.2188	24.1203	21.3814	27.0265	21.7303
YDR418W	RPL12B	3830.94	954.714	4073.34	837.288	3826.9	1818.83
YDR419W	RAD30	31.2642	31.0242	35.7002	39.3303	34.5892	31.6986
YDR420W	HKR1	22.3083	28.1632	20.062	30.6536	22.6188	25.8078
YDR421W	ARO80	69.6904	100.833	64.6046	132.093	83.1765	131.618
YDR422C	SIP1	35.2629	37.6606	36.9223	36.2034	41.4487	34.067
YDR423C	CAD1	40.0163	44.1521	34.8098	39.3902	35.5357	42.2874
YDR424C	DYN2	966.046	794.235	957.553	907.754	1155.94	1102.76
YDR425W	SNX41	15.1532	21.9178	14.9635	28.1401	19.4427	25.0976
YDR427W	RPN9	165.305	190.088	182.471	219.9	212.43	253.981
YDR428C	BNA7	100.081	70.3456	92.4718	50.5318	93.2132	76.5722
YDR429C	TIF35	432.354	236.948	459.697	202.266	535.329	334.422
YDR430C	CYM1	47.5334	31.4373	33.5408	26.7541	35.3887	39.6823
YDR432W	NPL3	341.881	269.355	260.262	256.415	337.672	301.216
YDR434W	GPI17	69.4816	128.191	79.7803	131.635	86.3199	121.106
YDR435C	PPM1	49.2859	52.2617	42.5433	55.3096	31.6795	44.0181
YDR436W	PPZ2	30.0052	46.0709	23.2726	43.2288	25.9525	46.8233
YDR437W	GPI19	76.3292	85.9888	80.0861	79.9089	79.0738	77.3877
YDR438W	THI74	34.9903	46.6336	35.6412	40.484	31.7042	39.4629
YDR439W	LRS4	42.2453	42.1897	39.0683	40.3402	41.0999	36.7849
YDR440W	DOT1	231.171	148.608	256.971	174.287	340.336	208.954
YDR441C	APT2	308.257	188.757	313.402	225.615	233.876	155.264
YDR443C	SSN2	936.281	1628.17	747.26	1567.28	1176.71	1996.33
YDR444W	YDR444W	37.676	18.5669	36.2235	23.1019	43.0796	23.3634
YDR447C	RPS17B	2295.36	503.26	2128.5	355.172	2530.55	1233.97
YDR448W	ADA2	41.3603	38.2086	42.0092	35.98	52.986	50.7491
YDR449C	UTP6	70.7028	47.2052	80.2576	47.6475	113.542	64.7609
YDR450W	RPS18A	3252.29	720.064	3398.12	567.992	2952.74	1268.84
YDR451C	YHP1	72.718	31.9483	69.1655	62.0172	57.1682	36.4693
YDR452W	PPN1	191.892	161.554	150.518	137.787	188.007	190.485
YDR453C	TSA2	24.7833	400.516	19.1016	224.27	23.8031	148.657
YDR454C	GUK1	805.409	281.3	854.185	242.077	732.57	364.875
YDR456W	NHX1	117.436	103.091	104.792	91.2936	73.4192	76.012
YDR457W	TOM1	52.5483	49.6826	45.3276	50.9541	56.8432	51.2711
YDR458C	HEH2	132.545	160.73	121.034	124.577	122.586	140.473
YDR459C	PFA5	56.972	53.569	58.9485	52.5669	57.7921	51.4725
YDR460W	TFB3	75.2224	100.474	67.9829	109.192	93.1511	110.02
YDR461C-A	YDR461C-A	151.97	462.35	170.692	740.26	169.474	648.198
YDR461W	MFA1	5004.24	4276.99	10411.4	6438.06	8420.8	4956.88
YDR462W	MRPL28	265.302	179.743	212.053	171.803	220.004	207.12
YDR463W	STP1	78.4039	83.7011	73.4623	81.6008	87.6977	95.1081
YDR464W	SPP41	26.1903	23.7351	24.3642	23.9862	30.5503	24.2625
YDR465C	RMT2	139.411	82.925	196.822	75.0455	292.49	118.19
YDR466W	PKH3	31.671	38.1822	32.5393	38.3708	42.4898	39.3158
YDR468C	TLG1	245.619	336.397	241.566	408.281	324.522	471.8
YDR469W	SDC1	187.586	188.012	210.917	215.93	268.597	274.639
YDR470C	UGO1	45.6337	42.3053	36.8554	32.3951	42.1854	40.7098
YDR471W	RPL27B	4038.48	1176.41	4231.11	1026.59	4230.59	2083.49
YDR472W	TRS31	164.325	116.356	167.091	115.578	194.269	129.821
YDR473C	PRP3	47.4856	49.451	46.5685	51.887	77.7267	72.6098
YDR475C	JIP4	23.3569	35.7123	21.6168	30.0497	17.6449	25.4893
YDR476C	YDR476C	222.084	301.161	194.025	297.131	120.435	172.226
YDR477W	SNF1	79.278	75.4134	57.8831	51.1227	53.3932	59.1503
YDR478W	SNM1	72.3449	47.7912	80.8007	56.7082	117.968	105.636
YDR479C	PEX29	45.6192	57.9834	42.053	47.9642	40.8168	47.1311
YDR480W	DIG2	35.1179	28.0693	36.7128	42.136	39.2802	37.7935
YDR481C	PHO8	182.636	170.045	116.929	131.578	105.208	122.664
YDR482C	CWC21	145.763	151.45	156.114	194.495	167.648	175.728
YDR483W	KRE2	502.102	401.805	464.379	328.439	393.326	325.082
YDR484W	VPS52	44.5349	49.8831	51.4348	62.2836	61.6453	69.8059
YDR485C	VPS72	34.6545	42.3134	33.8089	40.071	50.5321	46.7044
YDR486C	VPS60	286.717	350.36	272.885	409.686	278.161	383.878
YDR487C	RIB3	763.205	533.689	646.799	509.889	710.935	625.828
YDR488C	PAC11	21.2776	6.35928	17.7022	8.60851	17.0794	7.71958
YDR489W	SLD5	38.1512	29.6702	42.5801	29.1955	30.833	27.1634
YDR490C	PKH1	28.2678	32.3796	26.6807	32.5027	25.3926	28.2168
YDR492W	IZH1	479.821	179.846	417.918	157.078	504.971	180.924
YDR493W	MZM1	252.258	158.481	162.254	128.625	164.164	177.905
YDR494W	RSM28	274.103	158.878	195.526	139.876	308.484	312.655
YDR495C	VPS3	52.4591	66.5588	54.1661	67.0918	68.4755	83.4724
YDR496C	PUF6	125.708	57.8262	153.989	72.3809	256.731	108.946
YDR497C	ITR1	338.443	335.903	238.613	261.783	277.076	338.491
YDR498C	SEC20	77.5882	80.5524	66.503	63.7096	55.6742	56.7769
YDR499W	LCD1	21.7003	19.822	20.5882	23.8277	25.1619	21.592
YDR500C	RPL37B	14239.4	3378.55	13428.7	2609.25	12668.1	4604.66
YDR501W	PLM2	50.0154	41.5652	49.9777	38.85	57.0153	47.9654
YDR502C	SAM2	314.295	642.88	222.997	608.354	201.244	322.284
YDR503C	LPP1	63.915	178.147	54.2	161.895	54.894	151.538
YDR504C	SPG3	37.9959	59.7049	55.6686	97.418	99.6459	102.815
YDR505C	PSP1	55.9974	83.5728	45.407	83.8381	54.1753	78.3396
YDR506C	GMC1	65.7352	180.745	54.5147	182.883	93.6322	185.724
YDR507C	GIN4	56.5613	26.8035	47.3313	38.9966	48.5289	27.5383
YDR508C	GNP1	209.899	137.602	206.896	127.215	236.756	140.663
YDR510W	SMT3	1875.6	2174.06	1787.47	1853.7	977.915	1158.82
YDR511W	SDH7	262.057	240.908	159.202	191.341	159.725	251.747
YDR512C	EMI1	185.346	332.416	183.135	334.204	208.963	411.071
YDR513W	GRX2	430.889	804.776	343.767	875.093	293.13	900.483
YDR514C	YDR514C	54.8166	38.3829	58.0731	45.8379	88.8356	55.765
YDR515W	SLF1	54.7286	62.0059	40.9545	57.0152	67.9633	98.0309
YDR516C	EMI2	272.2	293.51	126.141	237.269	109.67	228.421
YDR517W	GRH1	153.5	118.383	140.54	136.724	135.384	115.129
YDR518W	EUG1	70.7459	251.308	62.1406	212.947	52.2323	127.562
YDR519W	FPR2	704.371	1707.09	611.939	1558.75	535.959	1407.48
YDR520C	URC2	23.6342	24.0691	22.662	27.4513	26.5477	23.039
YDR522C	SPS2	8.07596	19.4848	8.31435	23.8023	11.0174	21.4339
YDR523C	SPS1	44.012	228.861	93.3759	148.715	114.17	186.587
YDR524C	AGE1	107.735	105.597	128.372	118.243	134.517	87.3047
YDR524C-B	YDR524C-B	58392.7	15735.2	54840.3	16746.5	32885.3	14552.5
YDR524W-C	YDR524W-C	707090	206515	649407	281258	1230000	218580
YDR525W-A	SNA2	108.171	149.326	89.696	179.251	61.153	81.5205
YDR527W	RBA50	134.968	115.023	143.588	139.971	185.99	147.353
YDR528W	HLR1	39.8061	127.751	36.082	150.374	33.9953	69.2402
YDR529C	QCR7	2262.8	1546.12	1984.6	1622.8	2209.42	2025.77
YDR530C	APA2	65.7556	47.9377	54.4287	48.3669	44.9203	40.4004
YDR531W	CAB1	118.32	64.8887	117.806	67.0539	140.091	82.4671
YDR532C	KRE28	38.2259	33.3501	37.0195	54.024	75.5694	78.8355
YDR533C	HSP31	101.902	1046.67	72.0903	1473.51	55.4158	456.572
YDR534C	FIT1	24.3631	13.0977	19.1708	15.1356	15.7717	10.8753
YDR536W	STL1	21.2747	58.9128	24.4909	60.0866	23.6304	36.9529
YDR538W	PAD1	160.758	60.6	132.348	55.3018	105.994	59.5761
YDR539W	FDC1	84.0463	77.6818	71.0303	70.0158	83.6328	69.9383
YDR540C	IRC4	40.4466	298.203	46.9662	308.653	41.6333	186.088
YDR541C	YDR541C	64.6013	99.7572	66.3334	98.7273	58.5849	80.9803
YEL001C	IRC22	1076.48	539.104	1073.34	524.728	912.359	487.841
YEL002C	WBP1	402.63	358.944	382.734	342.194	316.415	351.075
YEL003W	GIM4	480.835	236.61	474.818	256.601	782.49	536.056
YEL004W	YEA4	32.3565	36.6497	32.3145	42.6833	33.0364	45.9976
YEL005C	VAB2	45.7984	73.7657	49.931	85.714	48.3798	78.5539
YEL006W	YEA6	120.679	114.238	112.726	111.618	114.301	109.679
YEL007W	MIT1	85.5987	122.951	71.7455	109.497	89.3877	80.8236
YEL009C	GCN4	2333.24	1203.46	2164.77	1152.09	2121.15	1208.64
YEL011W	GLC3	23.4794	37.2787	11.432	27.1326	8.44718	24.1208
YEL012W	UBC8	47.8042	148.236	41.4091	197.494	45.0826	138.109
YEL013W	VAC8	138.408	151.813	125.597	128.9	103.153	122.979
YEL015W	EDC3	117.718	67.1074	115.48	67.7189	131.483	82.6494
YEL016C	NPP2	56.5437	40.9746	58.4935	48.411	57.6334	46.2164
YEL017C-A	PMP2	3399.87	2674.16	4915.75	3103.69	3698.16	2468.04
YEL017W	GTT3	227.113	178.484	169.472	122.185	86.2167	102.145
YEL018W	EAF5	53.7404	51.1095	58.7627	59.6775	78.9869	68.3944
YEL019C	MMS21	18.8722	42.511	23.9795	48.5419	35.0728	42.4861
YEL020C	YEL020C	28.091	53.1854	28.0795	57.6404	39.8591	53.6833
YEL020W-A	TIM9	2272.28	1286.31	1716.75	1068.03	2494.79	2507.58
YEL021W	URA3	327.069	172.376	317.357	169.324	362.309	207.773
YEL022W	GEA2	29.1783	26.1025	31.7041	30.305	38.3512	30.5983
YEL023C	YEL023C	13.5933	15.4085	14.6531	16.9441	14.8396	13.5352
YEL024W	RIP1	936.539	468.369	709.292	505.547	803.72	615.902
YEL025C	YEL025C	25.6727	21.5817	28.1336	23.1614	27.7073	21.7793
YEL026W	SNU13	2871.22	1308.84	3039.06	963.621	1741.62	1247.7
YEL027W	VMA3	2522.45	1450.42	2369.83	1337.34	1802.11	1387.59
YEL029C	BUD16	144.249	132.54	139.433	145.738	201.424	204.448
YEL030W	ECM10	13.6926	14.0539	12.8044	16.7129	19.4962	25.7305
YEL031W	SPF1	185.484	249.453	159.6	186.633	95.0278	116.507
YEL032W	MCM3	42.0976	21.9323	40.9597	24.6712	41.8439	20.8693
YEL033W	MTC7	16146.3	7390.91	16281.7	6601.44	10923.2	5400.02
YEL034W	HYP2	14175.3	6738.95	14957.3	6161.09	9723.66	5154.17
YEL035C	UTR5	17.0821	59.8047	22.0967	53.9493	10.8345	32.473
YEL036C	ANP1	141.727	99.7095	162.523	120.011	170.922	121.819
YEL037C	RAD23	178.445	142.175	146.732	137.279	187.31	166.884
YEL038W	UTR4	171.271	133.79	153.854	133.503	94.6321	86.1241
YEL039C	CYC7	325.79	1783.39	149.694	1347.84	102.773	1557.82
YEL040W	UTR2	938.046	333.832	1031.42	451.55	889.498	377.602
YEL041W	YEF1	47.1034	204.482	40.782	226.479	35.1315	151.72
YEL042W	GDA1	255.084	113.468	209.577	73.319	136.306	85.0471
YEL043W	YEL043W	77.3347	88.8409	74.0692	71.2014	79.0405	73.1993
YEL044W	IES6	187.212	167.756	212.794	190.374	273.908	205.094
YEL046C	GLY1	463.888	209.888	517.396	224.06	499.81	277.296
YEL047C	FRD1	167.314	166.183	140.946	169.009	113.422	156.307
YEL048C	TCA17	50.0388	28.6818	56.9507	23.6848	56.5161	43.6788
YEL050C	RML2	291.703	138.699	180.863	130.708	307.627	208.109
YEL051W	VMA8	326.654	226.79	324.685	222.928	261.121	229.234
YEL052W	AFG1	110.421	83.4073	86.5913	68.1212	92.3281	92.2505
YEL053C	MAK10	56.5915	38.3701	65.5654	47.0672	78.5073	42.8392
YEL054C	RPL12A	4711.05	1170.95	4617.91	843.044	4207.18	1435.09
YEL055C	POL5	79.1935	42.4186	82.9372	42.6999	106.503	54.1737
YEL056W	HAT2	84.4466	60.3461	88.0451	77.3374	83.4912	68.8436
YEL057C	SDD1	10.551	31.3686	9.386	40.2604	18.2849	37.3722
YEL058W	PCM1	159.099	176.991	201.134	230.786	153.829	184.965
YEL059C-A	SOM1	513.08	681.676	523.834	1207.53	409.018	563.71
YEL060C	PRB1	106.805	200.285	58.4513	151.891	36.4449	100.9
YEL061C	CIN8	16.5386	7.76678	15.3221	11.5228	21.8913	12.331
YEL062W	NPR2	19.7674	29.8078	21.9183	32.7483	26.8536	35.9159
YEL063C	CAN1	129.992	133.088	106.609	120.156	100.165	88.4502
YEL064C	AVT2	47.6224	44.8777	37.6486	41.8766	37.9207	46.9571
YEL065W	SIT1	9.82184	5.88739	10.1966	9.15513	19.3664	18.396
YEL066W	HPA3	62.809	54.6083	61.2507	79.1705	41.0108	48.3301
YEL067C	YEL067C	24.1339	27.0617	26.4284	28.0058	26.7268	20.9689
YEL069C	HXT13	113.462	32.001	51.9894	69.0358	74.0663	66.1252
YEL070W	DSF1	88.5303	140.995	28.0684	246.706	33.0301	109.53
YEL071W	DLD3	259.581	198.539	241.555	200.747	262.483	223.237
YEL072W	RMD6	27.0383	79.7613	27.9319	102.953	30.0283	78.4516
YEL073C	YEL073C	106.199	313.309	113.825	231.588	124.269	249.871
YER001W	MNN1	200.173	72.7902	174.215	92.3567	127.772	47.6011
YER002W	NOP16	516.715	310.356	601.277	410.795	1081.13	639.893
YER003C	PMI40	334.485	236.635	267.297	224.961	159.126	97.444
YER004W	FMP52	406.102	381.076	330.66	344.526	193.633	213.212
YER005W	YND1	71.1477	64.3969	71.5038	63.2718	68.6274	55.4599
YER006W	NUG1	121.849	59.853	148.331	63.423	183.234	82.9435
YER007C-A	TMA20	208.475	127.817	251.44	128.122	276.822	203.917
YER007W	PAC2	103.651	129.924	106.348	137.245	136.287	161.173
YER008C	SEC3	68.0664	102.555	68.8393	102.573	72.0175	89.6815
YER009W	NTF2	2189.07	930.212	2101.63	876.434	1311.16	863.029
YER010C	YER010C	184.016	182.082	177.908	194.567	161.87	174.54
YER011W	TIR1	18.9758	12.6196	14.4775	7.82953	6.83037	6.09803
YER012W	PRE1	679.511	853.48	680.095	821.587	571.438	694.106
YER013W	PRP22	15.6261	25.6992	17.3444	24.9629	17.626	20.6845
YER014W	HEM14	20.443	21.9178	19.3001	30.5175	19.7481	31.8206
YER015W	FAA2	19.859	21.6553	17.713	18.8756	16.9246	21.4808
YER016W	BIM1	131.979	64.8452	145.884	75.2445	183.651	116.832
YER017C	AFG3	72.0534	64.1085	53.8879	50.9421	76.435	62.0281
YER018C	SPC25	50.8065	28.5348	38.6722	37.0114	39.7699	30.1557
YER019C-A	SBH2	4804.87	3014.34	4353.8	2736.68	3631.66	2548.94
YER019W	ISC1	91.3261	45.9512	77.1103	44.3677	45.0399	27.0609
YER020W	GPA2	67.5133	73.8179	51.903	66.9987	57.3062	70.2785
YER021W	RPN3	192.397	233.786	193.423	244.704	209.505	274.04
YER022W	SRB4	29.2783	29.7936	29.1858	29.4629	31.738	31.1011
YER023W	PRO3	505.234	308.128	397.899	290.341	341.893	222.485
YER024W	YAT2	24.6548	27.7683	24.896	26.1092	25.737	30.3206
YER025W	GCD11	355.235	185.317	329.816	157.62	467.762	220.166
YER026C	CHO1	472.32	414.488	312.224	333.416	340.46	611.996
YER027C	GAL83	137.622	179.639	115.783	170.243	94.7492	126.329
YER028C	MIG3	12.7521	29.6477	9.78821	25.3781	13.8923	17.661
YER029C	SMB1	168.98	115.193	175.539	142.091	244.705	157.873
YER030W	CHZ1	507.273	656.962	467.401	703.918	725.06	1228.67
YER031C	YPT31	456.492	214.598	429.044	229.587	311.984	208.079
YER032W	FIR1	37.5764	15.3145	35.2615	15.8416	28.4542	16.7075
YER033C	ZRG8	293.476	766.14	137.532	998.366	261.386	592.394
YER034W	YER034W	49.878	54.7122	55.9614	68.2514	79.715	87.0486
YER035W	EDC2	225.516	532.089	239.848	520.967	285.135	478.983
YER036C	ARB1	432.179	310.114	499.93	234.627	576.514	314.48
YER037W	PHM8	226.096	365.149	216.943	430.733	104.004	453.377
YER038C	KRE29	112.349	143.555	119.024	199.386	119.162	231.217
YER039C	HVG1	29.391	42.5355	21.3784	49.0609	19.6695	42.9259
YER039C-A	YER039C-A	114.638	192.648	72.0857	229.636	67.5165	197.834
YER040W	GLN3	35.3008	46.6361	26.9997	40.7693	26.6369	39.4383
YER041W	YEN1	74.8373	100.759	76.7705	126.915	96.6963	124.642
YER042W	MXR1	163.062	448.915	172.062	610.441	222.522	302.924
YER043C	SAH1	879.77	409.626	814.929	368.055	726.866	393.552
YER044C	ERG28	937.511	778.034	795.887	830.457	403.247	446.869
YER044C-A	MEI4	8.51007	17.5453	13.1488	21.713	12.4016	20.1934
YER045C	ACA1	71.1883	151.804	78.6219	208.132	43.1477	91.3872
YER046W	SPO73	81.9009	100.358	91.7023	144.557	59.1907	93.4637
YER047C	SAP1	93.8487	100.266	79.858	110.974	111.173	125.814
YER048C	CAJ1	131.395	137.463	134.725	163.27	182.941	206.927
YER048W-A	ISD11	1575.63	1905.97	1451.24	1997.06	1505.77	2321.16
YER049W	TPA1	146.803	92.3567	170.184	96.0081	243.751	111.09
YER050C	RSM18	576.907	545.048	489.636	574.091	730.93	1034.95
YER051W	JHD1	70.6564	97.7608	56.5958	83.7611	77.3377	96.6102
YER052C	HOM3	272.711	332.802	234.36	326.491	229.169	425.177
YER053C	PIC2	96.649	284.855	62.9551	220.23	39.5371	148.779
YER053C-A	YER053C-A	711.839	6438.1	1486.72	7142.6	1975.27	7809.74
YER054C	GIP2	52.5162	292.568	34.4025	325.267	24.8937	235.177
YER055C	HIS1	1208.05	682.147	947.065	405.862	880.438	552.146
YER056C	FCY2	1579.06	550.475	876.234	312.201	931.122	434.677
YER056C-A	RPL34A	5130.65	1302	6111.74	1614.71	6112.51	2277.55
YER057C	HMF1	1140.55	572.201	1106	500.298	757.111	411.699
YER058W	PET117	378.804	396.566	229.37	214.827	323.483	461.887
YER059W	PCL6	57.5762	57.8288	54.0659	50.9705	59.407	66.4558
YER060W	FCY21	57.3155	75.4695	44.4803	71.925	39.1027	50.2193
YER061C	CEM1	95.3393	59.2365	43.0823	47.7061	39.0274	48.1101
YER062C	GPP2	270.041	359.702	139.133	363.812	62.3472	188.005
YER063W	THO1	229.351	209.129	179.352	165.732	116.352	157.73
YER064C	VHR2	80.9158	100.504	53.2444	76.0882	53.0759	76.5563
YER065C	ICL1	45.4049	36.7911	27.925	25.7842	23.5293	20.4985
YER066W	RRT13	17.1387	25.2427	16.723	18.7945	11.3791	17.2107
YER067W	RGI1	189.033	529.137	41.4692	214.133	20.4334	210.058
YER068W	MOT2	78.7925	79.3731	71.6744	75.6773	83.4527	64.2897
YER069W	ARG5,6	96.2881	102.313	43.5149	79.7711	46.7454	61.0217
YER070W	RNR1	205.725	26.3276	174.634	48.9005	132.622	18.2709
YER071C	TDA2	205.332	271.723	175.759	230.601	213.317	341.139
YER072W	VTC1	3028.18	2376.93	2434.64	1449.73	1226.18	1305.63
YER073W	ALD5	72.5864	40.8503	57.9164	37.1661	68.9658	78.0069
YER074W	RPS24A	2109.25	500.129	2207.54	383.694	1866.51	925.563
YER074W-A	YOS1	1357.1	1579.53	1195.99	1487.05	1532.01	2548.95
YER075C	PTP3	20.7493	18.2695	22.3284	19.3173	27.8606	21.3428
YER076C	YER076C	43.7255	42.3594	33.2214	36.3379	25.6569	35.1581
YER077C	MRX1	166.338	224.998	185.797	287.015	269.143	332.215
YER078C	ICP55	36.6331	28.0623	33.339	25.576	36.1243	30.2249
YER079W	YER079W	54.6251	194.217	37.7044	238.095	43.6261	210.375
YER080W	AIM9	76.4781	57.5	64.6438	61.7674	89.1834	74.2437
YER081W	SER3	184.306	59.4901	66.6009	43.8376	67.4937	39.6387
YER082C	UTP7	81.6027	58.9589	95.2783	80.6561	171.088	102.402
YER083C	GET2	267.957	190.967	231.478	157.696	132.596	155.668
YER085C	YER085C	6.09382	1.82055	2.36482	6.20141	4.41722	10.6478
YER086W	ILV1	304.298	109.891	276.768	88.8708	202.252	116.615
YER087C-B	SBH1	4122.48	4122.44	4411.33	4807.33	3348.99	2287.89
YER087W	AIM10	36.0473	28.2004	27.6343	32.3408	38.7226	49.1386
YER088C	DOT6	127.29	125.339	85.8072	90.7516	100.808	88.2328
YER089C	PTC2	180.238	122.56	138.881	104.021	90.4128	76.6767
YER090W	TRP2	164.668	95.6995	161.019	89.4035	165.287	136.015
YER091C	MET6	921.385	1263.29	421.627	1294.52	408.934	835.705
YER092W	IES5	301.057	517.886	279.938	574.096	307.663	590.716
YER093C	TSC11	47.0874	47.2918	49.0765	50.0086	62.2637	61.0932
YER093C-A	AIM11	192.189	136.608	150.255	106.58	159.746	163.251
YER094C	PUP3	446.646	498.677	407.054	543.685	450.117	587.308
YER095W	RAD51	154.377	168.602	157.143	227.305	92.1636	87.1441
YER096W	SHC1	107.209	188.994	113.292	378.36	119.027	216.696
YER098W	UBP9	354.621	943.704	196.54	809.406	243.6	400.888
YER099C	PRS2	195.645	167.868	210.632	160.456	240.455	182.39
YER100W	UBC6	222.211	217.191	238.328	231.906	260.128	233.074
YER101C	AST2	24.5617	28.0666	22.6155	24.5779	22.8732	33.2183
YER103W	SSA4	68.1855	3589.46	78.9913	2571.75	1941.7	28202
YER104W	RTT105	50.7174	56.0806	42.8123	55.3036	42.0666	138.033
YER105C	NUP157	42.8442	36.9972	42.7813	35.8402	48.9819	39.5277
YER106W	MAM1	4.11964	7.37175	1.85035	13.2518	8.39869	22.7723
YER107C	GLE2	76.311	46.5496	73.2565	43.2893	66.1076	47.7997
YER109C	FLO8	38.3	36.8449	40.0302	43.4312	43.4364	35.5577
YER110C	KAP123	157.765	41.3619	176.019	42.1144	169.888	39.6887
YER111C	SWI4	25.6298	29.5356	25.4185	43.3664	26.7069	27.3654
YER112W	LSM4	554.866	406.401	514.415	402.221	662.708	551.716
YER113C	TMN3	51.8335	39.2538	47.3246	29.6103	42.5748	36.8789
YER114C	BOI2	41.6301	31.016	42.3495	29.798	48.223	30.0895
YER115C	SPR6	67.8146	31.2637	62.0762	30.8528	67.4127	37.2897
YER116C	SLX8	48.8831	54.287	51.8824	70.9678	55.0754	74.6389
YER117W	RPL23B	4103.35	1055.18	4255.92	844.763	5112.91	2674.6
YER118C	SHO1	170.648	102.257	190.718	100.828	187.112	112.491
YER119C	AVT6	87.8346	174.08	52.8502	147.361	28.5947	105.937
YER120W	SCS2	1138.77	590.517	932.969	518.132	563.657	424.894
YER121W	YER121W	12.1922	28.2843	11.948	42.4601	7.36477	47.8192
YER122C	GLO3	397.369	384.456	345.456	367.213	381.881	326.056
YER123W	YCK3	84.0007	70.0483	75.1079	56.3662	107.951	93.7091
YER124C	DSE1	182.466	116.377	165.932	106.075	150.483	98.8109
YER125W	RSP5	179.98	137.834	148.526	120.269	131.188	118.953
YER126C	NSA2	477.19	310.672	537.891	295.473	772.219	481.427
YER127W	LCP5	151.077	121.839	169.929	148.343	281.839	197.599
YER128W	VFA1	55.9324	78.2177	60.0378	84.6231	58.0882	82.1518
YER129W	SAK1	41.8529	44.7211	43.4319	44.8527	40.5067	35.4912
YER130C	COM2	54.0605	69.3883	69.0852	105.063	74.223	61.8251
YER131W	RPS26B	6470.9	1413.54	6701.6	1035.61	6712.72	2230.6
YER132C	PMD1	37.7207	43.4811	47.7344	56.398	60.5256	50.3749
YER133W	GLC7	389.693	431.718	343.456	407.011	446.741	526.917
YER134C	YER134C	317.638	404.275	281.532	325.42	241.732	351.223
YER136W	GDI1	290.151	344.507	256.694	326.923	271.176	279.649
YER137C	YER137C	65.1439	67.3351	80.2548	57.4052	171.808	127.273
YER139C	RTR1	58.5686	67.3487	53.0248	86.4822	64.8209	94.9181
YER140W	EMP65	37.2237	33.5819	40.3685	30.0052	41.9123	29.4096
YER141W	COX15	435.505	286.396	276.922	217.938	217.683	300.733
YER142C	MAG1	29.2081	65.9106	21.7861	77.2362	23.4548	88.7992
YER143W	DDI1	67.9285	90.3306	61.3193	97.6756	59.424	84.1323
YER144C	UBP5	84.8885	120.229	87.8489	126.109	81.2097	107.11
YER145C	FTR1	133.931	66.9586	137.657	60.988	176.83	69.4237
YER146W	LSM5	706.991	473.233	814.968	569.664	953.988	801.855
YER147C	SCC4	24.0549	24.6294	25.5634	28.1208	32.5651	27.8344
YER148W	SPT15	329.767	279.651	332.352	262.16	347.392	256.219
YER149C	PEA2	49.5476	23.7001	53.8816	36.3763	58.5527	31.6335
YER150W	SPI1	146.14	4959.36	123.913	5765.87	50.1223	1453.84
YER151C	UBP3	52.2744	44.0901	45.7402	39.2878	73.7396	56.3381
YER152C	YER152C	80.8312	54.2521	58.4559	49.653	55.3558	41.1564
YER153C	PET122	16.7929	10.9745	13.7576	9.79691	13.0095	8.76192
YER154W	OXA1	122.56	67.1106	77.844	34.5144	63.4206	47.1076
YER155C	BEM2	40.2591	40.7527	43.3584	37.9788	38.6866	34.1409
YER156C	YER156C	219.198	115.701	229.655	120.569	233.823	103.109
YER157W	COG3	30.9809	31.3493	34.5304	32.7167	39.5683	34.4054
YER158C	YER158C	41.621	113.883	38.5227	121.398	29.7421	68.9739
YER159C	BUR6	532.378	576.38	529.741	856.468	996.832	911.762
YER161C	SPT2	164.173	230.185	148.306	176.016	185.274	200.069
YER162C	RAD4	18.0821	29.0738	15.8494	30.3244	22.0521	34.9614
YER163C	GCG1	117.284	250.681	105.252	261.239	83.2705	197.539
YER164W	CHD1	65.8345	42.0089	66.5336	39.7338	67.0873	43.0835
YER165W	PAB1	493.16	240.264	435.975	195.621	426.224	213.035
YER166W	DNF1	40.2808	40.9212	37.8966	37.6402	33.5512	37.0968
YER167W	BCK2	49.9401	73.9954	54.7689	102.724	64.6149	90.1748
YER168C	CCA1	46.9218	37.8525	50.9363	40.2074	57.0063	40.3358
YER169W	RPH1	42.2472	79.6785	54.2734	95.1477	74.8061	81.2503
YER170W	ADK2	96.112	60.5587	79.8162	56.9961	95.6822	104.193
YER171W	RAD3	44.2336	39.2147	51.58	40.1543	55.2245	41.597
YER172C	BRR2	49.2878	47.2418	54.0684	49.2502	60.5729	46.6895
YER173W	RAD24	20.8568	21.5953	23.7386	27.9084	24.6026	24.7468
YER174C	GRX4	211.399	100.634	177.815	82.7145	184.834	118.493
YER175C	TMT1	45.0084	61.6972	35.1056	53.9792	31.6025	65.2831
YER175W-A	YER175W-A	392.941	202.94	441.602	425.403	840.856	432.837
YER176W	ECM32	32.6013	35.2093	31.173	43.2436	40.3649	37.0858
YER177W	BMH1	2816.01	3081.98	2387.49	3238.13	2145.11	3022.49
YER178W	PDA1	551.57	364.121	455.064	342.811	274.229	300.476
YER179W	DMC1	20.518	61.7385	18.008	85.197	16.5812	69.1948
YER180C	ISC10	127.016	99.0473	132.757	90.8371	122.293	81.5736
YER180C-A	SLO1	104.48	132.155	110.809	93.1375	103.829	106.329
YER182W	FMP10	150.391	93.9203	102.468	97.4936	164.307	200.644
YER183C	FAU1	119.466	106.69	116.813	102.054	106.715	127.487
YER184C	TOG1	12.0342	17.1505	12.9266	16.8434	14.1598	16.7007
YER185W	PUG1	8.41519	10.4753	6.65228	9.76138	7.79432	9.75721
YER186C	YER186C	100.027	46.815	90.7935	41.6425	87.0246	58.8911
YER187W	YER187W	21.2179	25.7733	23.1182	20.0153	25.0135	19.3787
YER188C-A	YER188C-A	43.979	57.5828	37.0012	40.9349	33.5312	24.296
YFL001W	DEG1	50.8039	27.0919	55.5953	28.9497	81.1292	35.9384
YFL002C	SPB4	55.1409	34.6718	55.8773	33.3179	70.6093	41.3457
YFL003C	MSH4	45.7839	65.8417	32.0325	50.2056	34.684	67.6263
YFL004W	VTC2	136.035	82.907	124.858	70.7151	105.556	76.4643
YFL005W	SEC4	994.507	774.749	813.357	730.606	1082.8	1104.43
YFL007W	BLM10	47.3766	50.4967	47.6966	56.0149	52.0736	43.432
YFL008W	SMC1	24.2333	17.3841	23.3645	20.907	26.849	18.7905
YFL009W	CDC4	60.9853	75.8613	60.7083	73.8067	65.8122	68.5282
YFL010C	WWM1	325.402	310.37	297.9	385.377	225.401	254.872
YFL010W-A	AUA1	238.224	204.732	214.848	254.203	154.384	145.914
YFL011W	HXT10	16.7235	28.3876	4.91656	26.6752	5.51016	43.0445
YFL012W	YFL012W	8.93253	26.0608	5.41629	22.5297	13.658	31.6131
YFL013C	IES1	43.2318	41.059	44.8306	52.9795	66.5197	63.9404
YFL014W	HSP12	848.683	87504.2	563.231	121758	141.452	104644
YFL016C	MDJ1	91.6846	210.072	84.3124	88.3439	285.083	605.581
YFL017C	GNA1	203.471	134.155	221.337	143.246	190.176	165.278
YFL017W-A	SMX2	514.985	559.035	619.291	543.427	582.175	434.276
YFL018C	LPD1	243.465	147.66	187.583	141.428	183.254	147.297
YFL020C	PAU5	27.34	88.3021	23.0994	90.1062	18.4119	54.3943
YFL021W	GAT1	199.401	187.911	124.505	198.028	91.3274	92.2815
YFL022C	FRS2	305.469	200.286	265.95	164.863	237.639	162.924
YFL023W	BUD27	34.4051	21.4474	34.6089	24.716	62.4454	32.3688
YFL024C	EPL1	128.449	151.353	134.305	159.273	196.799	157.709
YFL025C	BST1	37.3882	47.3326	42.3852	50.3512	36.2249	37.9784
YFL026W	STE2	670.593	233.965	901.495	260.44	775.565	305.232
YFL027C	GYP8	40.4682	31.9586	50.9648	38.2696	61.7407	50.8876
YFL028C	CAF16	79.4363	71.8616	88.286	64.6019	91.0209	115.502
YFL029C	CAK1	43.7807	60.574	44.5848	78.2477	56.6428	82.2396
YFL030W	AGX1	35.8246	64.8339	25.007	74.6812	24.9239	69.7137
YFL031W	HAC1	887.402	2335.83	701.853	2338.04	636.912	1559.03
YFL033C	RIM15	94.4633	194.613	92.6914	214.326	90.6063	144.062
YFL034C-A	RPL22B	634.407	417.411	659.832	373.403	706.159	618.946
YFL034C-B	MOB2	70.7906	73.1741	78.6247	99.2155	85.026	86.7953
YFL034W	YFL034W	42.6927	42.0549	39.8122	41.2471	48.5557	44.1848
YFL036W	RPO41	32.5253	30.5111	25.9927	22.2982	29.3731	29.9701
YFL037W	TUB2	504.626	246.386	430.499	267.099	353.936	218.33
YFL038C	YPT1	455.346	438.655	508.179	549.296	482.874	487.127
YFL039C	ACT1	3051.16	2630.01	2820.71	2517.23	1353.67	1464.51
YFL040W	YFL040W	91.4607	197.525	88.1131	199.79	117.446	260.637
YFL041W	FET5	75.4008	63.9274	67.2976	54.4942	80.2271	63.8079
YFL041W-A	YFL041W-A	40.0742	52.8191	33.0342	55.837	29.9029	41.9521
YFL042C	LAM5	23.0743	45.1622	17.5056	42.1823	16.1066	37.1813
YFL044C	OTU1	103.119	166.596	83.9947	160.021	96.219	151.531
YFL045C	SEC53	1926.04	1038.37	1762.58	894.329	1317.41	950.354
YFL046W	FMP32	104.91	120.433	102.413	172.81	155.327	173.688
YFL047W	RGD2	57.0449	52.0345	62.3184	53.6443	65.9308	58.5419
YFL048C	EMP47	103.145	136.117	101.795	111.272	122.293	171.843
YFL049W	SWP82	28.648	33.9185	30.5479	51.1292	32.9441	43.3894
YFL050C	ALR2	17.3467	32.4993	18.258	35.412	20.5036	32.0381
YFL051C	YFL051C	4.3653	14.3457	5.0821	36.9176	3.16427	6.07376
YFL052W	ZNF1	41.2278	67.2057	19.0545	89.9763	29.131	25.8815
YFL053W	DAK2	32.0025	53.2422	19.2914	49.4243	17.3362	33.1337
YFL054C	YFL054C	12.6443	20.2475	8.10906	18.207	9.32981	15.6232
YFL055W	AGP3	19.4261	65.1639	16.2145	70.4981	22.2336	56.1622
YFL056C	AAD6	27.9161	30.005	24.2764	29.8414	26.2509	24.7647
YFR001W	LOC1	459.244	183.736	543.005	312.529	1078.67	449.705
YFR002W	NIC96	60.4779	53.7284	66.0148	51.8424	78.2805	59.7296
YFR003C	YPI1	186.844	444.279	202.356	584.625	207.254	627.834
YFR004W	RPN11	174.465	224.439	185.132	264.536	220.232	257.089
YFR005C	SAD1	63.3564	31.3571	69.697	27.7197	77.2777	43.6622
YFR006W	YFR006W	221.93	147.186	198.298	145.893	207.135	187.161
YFR007W	YFH7	62.3969	57.6495	49.1081	54.1719	58.0042	51.2175
YFR008W	FAR7	21.8781	50.3513	22.9257	46.7784	22.4051	51.0361
YFR009W	GCN20	80.7012	61.2229	81.6154	56.2425	90.1602	63.6205
YFR010W	UBP6	150.594	143.182	130.217	139.438	131.626	146.709
YFR011C	MIC19	508.196	360.34	413.46	429.348	796.215	747.617
YFR012W	DCV1	4.59657	13.9777	3.11454	13.1345	8.56776	21.4601
YFR013W	IOC3	40.2193	28.0497	39.8305	32.1147	55.8131	41.3206
YFR014C	CMK1	66.9741	64.2473	48.8513	57.2113	44.4746	67.921
YFR015C	GSY1	28.9152	30.7073	11.299	19.744	8.84238	13.9759
YFR016C	YFR016C	43.6478	57.7465	36.0975	66.4622	49.5227	68.9364
YFR017C	IGD1	23.3677	82.6156	9.91066	62.1729	6.82632	37.9093
YFR018C	YFR018C	113.77	56.0736	86.9291	63.1925	74.2576	47.4816
YFR019W	FAB1	59.949	49.6426	39.9488	61.4306	62.1273	61.4719
YFR021W	ATG18	44.5448	61.0509	41.0193	57.8112	34.969	47.4423
YFR022W	ROG3	15.8155	29.2483	16.3205	25.9514	11.46	17.5043
YFR023W	PES4	9.56385	25.7152	5.56714	32.5542	15.5982	45.3362
YFR024C-A	LSB3	124.375	110.086	94.2524	111.095	104.327	109.173
YFR025C	HIS2	108.672	123.632	108.989	129.345	102.611	119.742
YFR026C	ULI1	33.4206	248.077	29.4599	194.838	35.6522	54.8695
YFR027W	ECO1	23.5385	24.2296	22.446	27.004	20.7127	21.7265
YFR028C	CDC14	86.8702	50.8163	98.5154	59.5622	102.355	57.7999
YFR029W	PTR3	17.2421	26.4851	16.5825	27.9837	21.5302	21.3793
YFR030W	MET10	36.2054	82.2365	37.2369	142.105	40.2464	52.5656
YFR031C	SMC2	54.7955	53.5472	57.9875	64.3804	67.394	61.181
YFR031C-A	RPL2A	2445.52	473.007	2455.33	396.092	2477.06	830.841
YFR032C	RRT5	15.2163	14.6217	20.9612	46.4429	16.3585	21.018
YFR032C-A	RPL29	30663.8	7385.87	31125.9	5651.95	27861	11458.6
YFR032C-B	YFR032C-B	41.6361	18.1401	32.9137	38.962	20.1205	22.454
YFR033C	QCR6	2414.56	1482.27	1743.56	1745.54	2481.75	1598.35
YFR034C	PHO4	59.7355	25.4677	33.0813	22.6573	44.8567	25.2849
YFR035C	YFR035C	50.5884	41.1136	60.4174	37.3564	37.923	26.7912
YFR036W	CDC26	93.3306	260.289	101.893	267.084	158.054	193.209
YFR037C	RSC8	141.091	71.3627	141.393	86.8215	196.557	121.831
YFR038W	IRC5	48.6063	28.8427	48.4419	34.227	57.3179	31.7983
YFR039C	OSW7	49.6498	63.0433	56.7006	59.2715	55.0664	61.4097
YFR040W	SAP155	51.0064	53.7278	49.169	44.3238	60.0177	45.9338
YFR041C	ERJ5	82.878	176.713	85.0888	182.158	102.446	194.859
YFR042W	KEG1	100.764	308.715	98.6325	285.215	111.031	320.802
YFR043C	IRC6	62.1381	57.5822	66.3865	63.976	73.5106	84.4227
YFR044C	DUG1	431.055	336.795	362.113	283.779	158.624	225.647
YFR045W	YFR045W	69.7762	58.8092	51.5544	60.1052	58.1002	62.8477
YFR046C	CNN1	36.0774	36.12	35.8457	49.4157	40.5598	41.4703
YFR047C	BNA6	330.527	538.297	232.992	478.806	161.623	321.072
YFR048W	RMD8	30.9044	31.6794	29.7406	26.5397	29.019	26.5622
YFR049W	YMR31	238.297	270.851	170.554	273.23	170.976	265.839
YFR050C	PRE4	494.379	588.43	470.252	629.966	459.006	516.434
YFR051C	RET2	183.021	181.856	143.163	152.117	104.152	106.359
YFR052W	RPN12	177.003	240.526	181.078	264.586	141.503	208.142
YFR053C	HXK1	450.841	394.256	202.011	278.105	115.8	207.572
YFR055W	IRC7	294.8	148.333	243.767	153.195	271.562	146.599
YGL001C	ERG26	219.996	143.038	216.459	145.651	191.947	153.239
YGL002W	ERP6	133.905	153.173	127.167	103.024	93.8074	113.685
YGL003C	CDH1	43.7206	38.5713	44.468	38.4927	47.968	34.6847
YGL004C	RPN14	59.0351	68.2172	51.177	57.2997	60.0426	86.0065
YGL005C	COG7	88.049	78.542	79.4405	68.6762	102.574	108.515
YGL006W	PMC1	34.5122	50.6625	28.5167	36.745	26.2768	42.0866
YGL007C-A	YGL007C-A	1766.4	824.559	1904.11	1549.64	1000.32	357.226
YGL008C	PMA1	2214.41	1102.39	2207.94	1371.13	1259.6	493.761
YGL009C	LEU1	66.3111	46.5878	60.6902	51.6301	50.2688	37.8131
YGL010W	MPO1	40.3899	91.4017	40.384	84.2191	31.0277	87.4829
YGL011C	SCL1	371.369	512.205	384.061	583.437	324.949	410.994
YGL012W	ERG4	438.838	225.078	401.723	252.904	226.199	175.566
YGL013C	PDR1	34.7177	31.537	35.8334	37.9707	44.1766	37.5123
YGL014W	PUF4	93.9633	52.7158	78.5479	41.6796	99.898	48.9096
YGL015C	YGL015C	7.20182	4.20229	5.49902	9.47712	3.26273	6.55405
YGL016W	KAP122	39.2819	27.2685	40.9187	25.0164	51.4242	30.9555
YGL017W	ATE1	29.3636	38.4207	31.7319	39.0582	35.165	35.8077
YGL018C	JAC1	51.9667	51.5905	48.4566	62.7959	46.9565	70.2946
YGL019W	CKB1	243.704	205.494	223.409	185.792	230.083	184.258
YGL020C	GET1	215.335	201.824	189.287	140.104	206.804	217.533
YGL021W	ALK1	92.9568	34.6967	96.5032	69.7866	93.0762	42.3741
YGL022W	STT3	195.427	126.986	161.51	109.927	160.402	111.1
YGL023C	PIB2	40.9436	40.6939	35.0854	44.3373	44.5824	42.0516
YGL025C	PGD1	46.6149	33.0805	42.6712	37.956	53.0956	40.6092
YGL026C	TRP5	147.008	104.656	122.271	88.9747	79.0895	100.003
YGL027C	CWH41	73.5177	57.0784	76.1357	61.3285	76.7278	63.2268
YGL028C	SCW11	531.285	369.298	473.852	242.977	393.33	264.904
YGL029W	CGR1	375.695	192.185	471.298	188.753	1037.28	521.168
YGL030W	RPL30	7098.62	1180.25	6984.26	774.764	4262.64	1328.63
YGL031C	RPL24A	4152.81	923.25	3959.27	731.319	4227.34	1747.67
YGL032C	AGA2	1586.8	582.852	1867.75	765.646	1910.5	676.171
YGL035C	MIG1	63.5915	41.2686	40.9526	48.3956	60.1751	44.4517
YGL036W	YGL036W	102.182	206.21	109.433	240.47	117.974	209.736
YGL037C	PNC1	908.715	3536.87	791.33	4493.78	272.192	2923.42
YGL038C	OCH1	100.806	88.3636	99.298	108.457	99.1104	84.6635
YGL039W	YGL039W	48.6662	38.4973	50.7741	44.2629	43.5895	39.5487
YGL040C	HEM2	340.244	152.839	264.298	108.267	199.813	155.599
YGL041C-B	YGL041C-B	121.714	106.057	87.4689	71.1855	80.8743	85.331
YGL041W-A	YGL041W-A	184.002	168.336	179.688	162.788	238.803	340.333
YGL043W	DST1	111.24	138.693	101.06	127.842	96.7509	120.573
YGL044C	RNA15	97.4212	98.1471	99.1578	103.936	117.322	102.739
YGL045W	RIM8	14.6237	27.9775	13.6832	30.107	14.436	22.6007
YGL047W	ALG13	121.333	220.422	100.926	242.327	95.6545	242.382
YGL048C	RPT6	247.703	257.274	229.194	250.131	209.083	244.206
YGL049C	TIF4632	62.2854	49.8963	52.5131	45.7693	59.5181	50.3261
YGL050W	TYW3	180.201	166.354	170.251	156.581	221.765	165.413
YGL053W	PRM8	32.5226	83.1802	37.7097	68.4922	27.0745	75.5364
YGL054C	ERV14	476.039	378.161	534.547	351.554	558.127	527.924
YGL055W	OLE1	1313.56	259.443	1167.82	219.676	1211.39	248.918
YGL056C	SDS23	102.304	86.0392	93.9468	79.0217	123.717	86.6443
YGL057C	GEP7	39.4433	37.8597	37.6519	38.1468	39.9013	38.5064
YGL058W	RAD6	266.536	387.468	269.479	355.151	356.501	443.294
YGL059W	PKP2	23.8902	33.7063	21.0892	45.4439	30.9088	75.1967
YGL060W	YBP2	25.6953	22.4837	28.7707	24.853	32.4391	26.5259
YGL061C	DUO1	65.9028	66.088	71.1368	74.8801	77.6599	60.2805
YGL062W	PYC1	35.4089	49.6518	26.3951	41.4022	32.1716	40.3686
YGL063W	PUS2	39.4598	21.9228	34.5023	19.8839	28.9547	15.6092
YGL064C	MRH4	25.5767	19.4256	23.3265	19.9107	37.3	24.7555
YGL065C	ALG2	66.0529	47.7181	56.6196	47.5356	59.0815	46.7179
YGL066W	SGF73	35.083	39.1674	29.6215	36.3677	36.8725	43.1427
YGL067W	NPY1	115.139	84.4771	117.675	92.817	87.4011	73.237
YGL068W	MNP1	872.092	430.74	627.927	227.242	731.909	671.864
YGL070C	RPB9	332.84	202.903	368.737	221.091	380.292	294.472
YGL071W	AFT1	27.4144	42.3026	29.0333	42.6599	32.2023	37.6366
YGL073W	HSF1	38.1314	78.5973	0.0867181	0.0705744	9.74917	15.911
YGL075C	MPS2	52.9428	70.1802	61.5406	67.0466	68.7668	58.2734
YGL076C	RPL7A	938.26	173.783	912.032	122.244	629.454	205.694
YGL077C	HNM1	252.268	223.302	179.526	160.394	124.23	157.904
YGL078C	DBP3	155.358	73.0877	168.161	61.5304	258.655	102.687
YGL079W	KXD1	91.9875	92.7006	89.5097	92.7053	85.8658	117.445
YGL080W	MPC1	450.25	557.812	442.489	632.794	554.368	658.209
YGL081W	YGL081W	24.9467	48.4773	18.9168	57.0772	20.0959	62.9892
YGL082W	YGL082W	156.805	136.502	132.417	121.449	148.809	165.897
YGL083W	SCY1	34.6036	29.1669	30.0064	26.9221	31.3731	26.6838
YGL084C	GUP1	103.395	128.377	84.3411	103.056	94.8163	135.37
YGL085W	LCL3	79.5863	89.6166	71.7111	75.0168	76.6535	88.4001
YGL086W	MAD1	414.234	399.051	453.16	385.595	536.109	487.348
YGL087C	MMS2	434.846	762.814	405.459	977.211	311.561	648.463
YGL089C	MF(ALPHA)2	13.5918	13.8698	12.6071	12.4785	9.1649	9.20505
YGL090W	LIF1	25.7331	37.1442	18.5734	43.3841	20.7212	32.7272
YGL091C	NBP35	84.8821	115.57	77.5633	114.694	84.3551	117.682
YGL092W	NUP145	49.9378	30.1165	50.7947	29.4703	55.9386	32.1913
YGL093W	SPC105	22.6921	27.5547	20.6073	28.101	25.1558	28.243
YGL094C	PAN2	37.796	39.8397	38.4309	40.3618	37.9066	31.6084
YGL095C	VPS45	77.6253	83.1807	71.7702	93.8436	85.3206	90.1406
YGL096W	TOS8	9.92056	63.1566	11.6159	72.7768	11.3911	39.2954
YGL097W	SRM1	88.2132	39.7497	98.7609	44.9699	137.016	75.0105
YGL098W	USE1	93.2445	121.417	89.2727	132.391	95.9219	124.415
YGL099W	LSG1	47.9255	27.8611	59.0589	31.1616	93.3105	41.6421
YGL100W	SEH1	189.518	174.302	200.889	176.162	195.083	163.623
YGL101W	YGL101W	337.868	141.726	280.413	123.894	294.556	162.463
YGL103W	RPL28	6497.71	1817.57	6390.16	1662.21	6278.23	2869.82
YGL104C	VPS73	44.0346	73.2301	37.2067	60.7577	29.814	74.5469
YGL105W	ARC1	631.469	379.06	583.761	303.142	490.727	363.697
YGL106W	MLC1	488.523	283.94	592.059	425.453	573.723	409.434
YGL107C	RMD9	76.3825	39.5318	60.0176	35.9797	68.9921	49.3233
YGL108C	YGL108C	253.813	348.058	247.651	359.245	392.02	574.411
YGL110C	CUE3	31.219	31.6246	32.4905	36.0242	44.7482	44.8715
YGL111W	NSA1	126.584	69.6816	145.036	73.8595	195.056	97.8585
YGL112C	TAF6	103.942	77.3789	102.386	75.2808	106.755	69.5565
YGL113W	SLD3	23.3305	22.741	29.498	27.2074	45.2355	32.5495
YGL114W	YGL114W	92.5656	64.9241	74.9883	55.8964	79.8653	62.5008
YGL115W	SNF4	179.054	183.792	151.682	129.184	147.968	200.801
YGL116W	CDC20	34.2101	7.99793	32.4129	15.5287	37.4743	12.07
YGL117W	YGL117W	98.0898	226.501	62.2248	212.91	78.4171	308.189
YGL119W	COQ8	66.1507	70.3373	60.4168	60.0737	62.3219	78.741
YGL120C	PRP43	91.2653	65.2628	117.012	70.2416	160.634	89.61
YGL121C	GPG1	58.6605	1004.2	33.1766	984.937	19.3061	572.411
YGL122C	NAB2	95.3728	66.512	78.1828	66.8644	102.577	77.9172
YGL123W	RPS2	5226.85	1082.1	5176.64	896.153	5085.28	1705.34
YGL124C	MON1	26.7835	35.8585	31.8664	40.2499	33.6039	41.7177
YGL125W	MET13	26.2209	48.2598	22.4194	53.0923	24.3595	41.7454
YGL126W	SCS3	100.505	243.48	81.4034	255.957	77.6702	228.484
YGL127C	SOH1	136.837	380.6	159.496	459.76	148.127	253.61
YGL128C	CWC23	47.6859	59.2114	48.6622	61.1478	53.2172	67.6989
YGL129C	RSM23	162.143	83.3198	114.347	65.1917	134.297	86.3647
YGL130W	CEG1	58.7643	63.0424	71.897	82.783	84.1414	82.367
YGL131C	SNT2	13.8137	17.8121	13.6612	22.5594	16.6085	21.4634
YGL133W	ITC1	26.594	39.5729	25.5785	46.1836	29.3364	51.2702
YGL134W	PCL10	43.6272	50.1484	39.8252	53.023	43.7337	45.07
YGL136C	MRM2	68.5057	69.1432	66.2764	70.2933	77.2286	82.0149
YGL137W	SEC27	115.894	103.167	107.5	106.434	119.849	96.7135
YGL139W	FLC3	70.3809	53.2064	66.7011	47.2873	87.0408	62.136
YGL140C	YGL140C	49.7134	53.8939	50.7149	51.5363	47.4608	44.7786
YGL141W	HUL5	26.8097	52.8134	23.1039	55.4912	27.2184	49.7783
YGL142C	GPI10	93.4273	108.231	87.3277	108.158	89.5399	125.09
YGL143C	MRF1	63.4602	39.2333	50.317	31.0167	55.6756	44.855
YGL144C	ROG1	17.5676	22.4248	18.4066	22.345	21.4116	20.1848
YGL145W	TIP20	97.9716	65.9356	108.311	81.8199	136.002	100.202
YGL146C	RRT6	12.5652	15.887	7.19811	14.4878	5.98532	9.58361
YGL147C	RPL9A	1255.37	152.07	1285.84	139.102	1272.4	424.581
YGL148W	ARO2	386.231	181.716	385.37	169.151	456.17	240.816
YGL150C	INO80	36.3906	48.6839	35.5809	38.3653	35.1738	41.2882
YGL151W	NUT1	35.1418	39.4488	36.3774	46.0995	48.2381	52.8616
YGL153W	PEX14	44.347	45.1953	48.8385	54.1504	59.9665	68.3704
YGL154C	LYS5	54.9055	69.9066	52.1461	71.5524	58.1438	62.7217
YGL155W	CDC43	106.783	71.5059	113.53	62.4974	122.922	83.7669
YGL156W	AMS1	14.0526	76.7855	10.5039	80.5531	11.8373	49.1182
YGL157W	ARI1	113.406	228.663	116.045	213.186	75.5588	125.924
YGL158W	RCK1	11.3119	79.1559	15.8004	102.928	27.8119	63.2379
YGL159W	YGL159W	53.9766	53.0637	59.9305	52.4199	67.6879	72.5254
YGL160W	AIM14	76.7343	123.991	66.0878	99.6213	66.7268	96.4649
YGL161C	YIP5	330.678	390.094	268.424	326.632	294.826	431.172
YGL162W	SUT1	15.2205	12.7889	18.4385	14.3065	27.9104	12.7228
YGL163C	RAD54	19.085	26.0724	17.2281	28.2549	19.9348	23.6039
YGL164C	YRB30	49.962	50.9285	44.7895	57.0997	73.4865	76.7425
YGL166W	CUP2	59.314	61.6988	67.7065	68.9974	89.0778	96.5812
YGL167C	PMR1	110.678	100.475	104.596	80.2957	101.107	84.0615
YGL168W	HUR1	347.857	254.318	287.386	243.39	392.671	260.11
YGL169W	SUA5	76.3685	39.9319	95.7484	39.1563	110.963	50.1963
YGL170C	SPO74	171.172	219.815	104.763	357.662	131.665	319.613
YGL171W	ROK1	53.2786	22.7131	60.8327	23.4252	95.3616	38.8043
YGL172W	NUP49	79.8445	55.9167	86.4077	62.7223	99.2671	68.3942
YGL173C	XRN1	77.1742	73.9532	70.0659	66.472	63.7548	56.3724
YGL174W	BUD13	35.5944	50.5952	37.2461	42.9717	37.2636	45.3305
YGL175C	SAE2	14.797	18.8743	12.4061	19.3918	10.6487	14.5806
YGL176C	YGL176C	30.8356	36.0001	26.7821	31.8923	33.739	26.4999
YGL178W	MPT5	263.082	476.321	341.447	611.622	462.173	536.057
YGL179C	TOS3	19.2249	99.789	20.215	102.989	17.4764	36.525
YGL180W	ATG1	34.7854	76.0221	25.0934	63.9464	22.3196	42.3148
YGL181W	GTS1	84.8508	92.524	87.7152	101.454	97.1393	123.627
YGL183C	MND1	12.1459	20.411	9.16498	20.2453	12.1057	22.5981
YGL184C	STR3	15.5241	252.986	6.84785	270.014	13.9582	170.063
YGL185C	YGL185C	34.796	47.2182	41.4261	62.1441	46.999	78.4433
YGL186C	TPN1	200.77	132.727	94.0958	90.4806	81.5989	99.5334
YGL187C	COX4	1069.99	380.837	899.887	480.713	1019.94	555.973
YGL189C	RPS26A	10739.7	3018.65	11932.5	2492.75	8099.19	3737.99
YGL190C	CDC55	76.5087	95.3446	79.1734	77.745	88.6502	80.5488
YGL191W	COX13	1209.04	1079.52	1115.37	1097.62	1018.98	879.876
YGL192W	IME4	91.1944	59.7073	79.9396	57.2375	67.3793	43.8116
YGL193C	YGL193C	599.849	392.153	507.944	404.406	475.079	294.061
YGL194C	HOS2	31.8549	32.85	25.1815	32.3661	34.4095	37.1539
YGL194C-A	YGL194C-A	749.517	2204.3	765.344	2032.65	821.013	1536.07
YGL195W	GCN1	113.32	89.7578	117.408	81.582	111.019	81.8909
YGL196W	DSD1	111.281	139.454	78.8494	119.775	93.5768	136.879
YGL197W	MDS3	49.1697	70.8434	43.1356	56.5888	42.8168	52.8251
YGL198W	YIP4	244.928	185.888	200.349	154.172	118.966	178.482
YGL200C	EMP24	1731.61	1447.6	1455	1321.95	1371.68	1399.56
YGL201C	MCM6	196.3	164.614	170.089	146.871	180.635	161.217
YGL202W	ARO8	649.922	300.352	558.913	271.33	382.497	300.837
YGL203C	KEX1	62.2624	84.1364	60.0073	74.2987	85.4748	102.563
YGL205W	POX1	31.4798	49.7372	28.7114	60.7894	28.839	45.4702
YGL206C	CHC1	49.875	49.6831	41.6668	41.5756	47.4506	49.4945
YGL207W	SPT16	104.477	78.8087	100.2	81.5884	108.213	80.1752
YGL208W	SIP2	37.9063	53.4339	31.176	54.7267	28.2827	45.2386
YGL209W	MIG2	35.9833	26.7196	24.2893	24.8494	29.0456	21.0469
YGL210W	YPT32	153.374	107.443	164.877	116.323	168.982	100.604
YGL211W	NCS6	77.4691	61.5793	99.6684	81.6775	139.126	86.1843
YGL212W	VAM7	28.235	31.7489	28.4185	37.3606	40.1418	40.9485
YGL213C	SKI8	141.416	102.089	136.845	95.0735	135.665	87.7452
YGL215W	CLG1	477.607	358.441	390.339	296.661	481.39	332.612
YGL216W	KIP3	33.0124	27.1935	32.4623	30.1405	29.4174	26.8918
YGL219C	MDM34	88.5217	79.5194	74.5129	69.0618	91.3899	98.6208
YGL220W	FRA2	1846.17	1867.12	1663.44	1509.58	1549.24	2156.6
YGL221C	NIF3	358.992	378.388	342.184	439.751	407.609	462.326
YGL222C	EDC1	109.071	98.7657	82.5382	88.147	81.1293	105.928
YGL223C	COG1	60.3874	60.4445	67.9322	67.4256	72.2287	65.5855
YGL224C	SDT1	155.381	164.13	135.591	168.899	102.373	126.771
YGL225W	VRG4	437.713	183.714	411.497	202.048	340.709	186.999
YGL226C-A	OST5	1565.72	640.624	1712.86	649.169	1201.99	610.351
YGL226W	MTC3	178.674	211.626	148.845	206.399	198.407	247.605
YGL227W	VID30	52.1237	101.493	38.5429	93.7161	35.5623	90.5691
YGL228W	SHE10	95.2955	104.183	96.7023	107.784	110.562	118.922
YGL229C	SAP4	55.3319	156.068	33.5049	102.886	43.5062	112.533
YGL230C	YGL230C	8.15974	21.4127	11.4109	33.2771	12.389	31.5764
YGL231C	EMC4	426.893	381.521	416.735	411.972	348.109	370.38
YGL232W	TAN1	114.497	74.0632	122.943	81.2709	165.789	134.24
YGL233W	SEC15	85.5602	117.177	94.4953	120.062	110.921	130.053
YGL234W	ADE5,7	1126.16	282.054	478.111	134.299	255.246	95.6611
YGL236C	MTO1	47.5993	26.5763	34.2908	19.3098	42.8707	30.2209
YGL237C	HAP2	56.9572	62.077	52.9077	56.8777	47.2511	63.7134
YGL238W	CSE1	68.1873	62.2321	76.8949	64.2116	76.4932	65.7187
YGL240W	DOC1	15.8805	20.1155	18.9693	19.7305	17.578	18.7487
YGL241W	KAP114	97.6366	67.7123	98.3056	77.0041	132.586	113.994
YGL242C	YGL242C	419.649	576.608	373.73	611.19	384.969	828.461
YGL243W	TAD1	48.0596	45.0979	56.675	51.9813	71.4796	66.0793
YGL244W	RTF1	130.051	95.4553	116.122	109.093	171.465	152.599
YGL245W	GUS1	217.399	103.225	189.025	74.5845	152.695	86.2629
YGL246C	RAI1	89.5147	80.345	102.738	78.0606	112.202	83.2795
YGL247W	BRR6	74.7255	74.8606	70.3518	70.6641	94.7468	96.462
YGL248W	PDE1	77.4761	264.245	74.3967	315.374	56.7268	155.211
YGL249W	ZIP2	645.872	981.598	1102.48	1374.9	1269.8	565.818
YGL250W	RMR1	53.1813	100.306	41.9565	88.0395	32.0975	74.143
YGL251C	HFM1	50.6471	51.1336	51.7225	58.9826	48.7906	56.2831
YGL252C	RTG2	63.9305	62.1682	66.0166	61.4058	69.8637	63.7506
YGL253W	HXK2	1220.16	551.216	1166.14	616.24	973.368	383.451
YGL254W	FZF1	74.7751	71.6329	70.0033	75.0178	84.9629	63.1605
YGL255W	ZRT1	160.687	67.0683	82.44	68.5808	128.194	55.4892
YGL256W	ADH4	115.539	100.882	125.246	85.5619	94.6535	72.3579
YGL257C	MNT2	69.3944	46.9875	74.8725	45.0059	75.7767	46.6995
YGL258W	VEL1	10.0383	21.9498	10.1091	18.1924	15.0795	17.6298
YGL258W-A	YGL258W-A	33.5659	133.184	15.83	57.0537	5.70256	40.7291
YGL259W	YPS5	10.013	40.5088	6.83599	23.4248	4.83874	12.1498
YGL260W	YGL260W	146.303	225.669	128.91	158.484	84.1486	97.7672
YGR001C	EFM5	151.753	91.7324	156.856	84.7909	133.462	83.5941
YGR002C	SWC4	35.1281	39.3914	35.6369	42.2884	36.2497	37.2255
YGR003W	CUL3	32.462	31.7113	36.2599	39.5937	42.2564	28.9219
YGR004W	PEX31	25.8548	28.1981	29.149	23.4451	28.6923	30.6688
YGR005C	TFG2	124.468	108.517	108.052	100.767	129.46	119.37
YGR006W	PRP18	189.883	260.236	327.553	182.738	142.875	175.734
YGR007W	ECT1	125.273	80.3894	136.989	89.0729	120.715	78.6722
YGR008C	STF2	1478.56	14511.4	766.355	12253.1	578.628	12674
YGR009C	SEC9	49.0165	67.478	44.1653	81.2978	73.7171	99.7295
YGR010W	NMA2	58.9322	71.6367	54.4222	63.464	54.9109	54.775
YGR012W	YGR012W	50.4473	49.1515	47.9888	56.632	51.5587	52.6839
YGR013W	SNU71	40.0334	46.5041	38.788	51.2475	52.6513	53.1305
YGR014W	MSB2	109.432	41.5823	109.121	68.8218	79.5852	34.3983
YGR015C	YGR015C	41.2131	32.8238	33.8987	31.6435	29.7915	22.5419
YGR016W	YGR016W	14.3413	18.8542	13.882	15.9195	17.9006	20.9533
YGR017W	YGR017W	336.516	307.084	298.575	269.048	347.653	359.137
YGR019W	UGA1	92.2312	213.034	61.3338	218.581	50.6937	161.157
YGR020C	VMA7	1498.18	863.775	1540.64	864.071	1238.36	763.125
YGR021W	YGR021W	88.6246	74.8129	62.305	90.3947	93.7498	115.446
YGR023W	MTL1	42.2917	138.328	41.2128	111.082	39.7392	97.4622
YGR024C	THG1	139.481	110.456	137.908	104.919	126.382	104.38
YGR026W	YGR026W	431.178	363.662	366.043	367.344	380.127	429.795
YGR027C	RPS25A	5805.34	1335.12	5588.37	1017.18	4441.15	2072.22
YGR028W	MSP1	65.2936	153.662	51.1514	135.782	56.0168	158.762
YGR029W	ERV1	193.34	122.373	185.513	143.358	225.546	249.138
YGR030C	POP6	101.112	61.2793	106.541	67.2354	128.4	86.5501
YGR031W	IMO32	28.8801	18.2718	28.5324	25.9758	33.2815	21.094
YGR032W	GSC2	42.6937	77.0589	39.9627	82.133	44.2846	50.826
YGR033C	TIM21	220.715	163.366	228.773	166.645	289.229	274.315
YGR034W	RPL26B	5374	1185.57	5213.41	813.751	5259.13	2195.08
YGR035C	YGR035C	142.863	77.7527	243.067	112.915	289.614	104.916
YGR035W-A	YGR035W-A	782.281	711.922	863.291	513.188	870.769	798.063
YGR036C	CAX4	85.778	93.43	85.8469	72.8402	100.142	109.495
YGR037C	ACB1	4043.11	4334.12	4602.23	4896.72	2790.57	2826.92
YGR038W	ORM1	265.334	210.83	203.458	161.405	148.068	154.73
YGR040W	KSS1	69.1706	55.7721	71.7488	62.0384	71.0279	62.2485
YGR041W	BUD9	64.5792	33.1875	56.4007	28.1575	57.3744	24.5546
YGR042W	YGR042W	74.0383	74.1337	79.3853	114.256	118.936	131.469
YGR043C	NQM1	5.55176	277.456	5.9846	205.151	9.0699	178.212
YGR044C	RME1	309.399	313.766	253.932	311.93	182.387	195.74
YGR046W	TAM41	106.917	98.2552	89.824	116.22	115.573	110.83
YGR047C	TFC4	19.289	20.2366	20.7579	22.52	24.3184	24.2723
YGR048W	UFD1	57.4562	86.479	55.0475	119.881	64.1845	99.7166
YGR049W	SCM4	289.002	272.445	313.191	291.62	227.402	138.282
YGR052W	FMP48	10.3257	62.7037	17.3207	53.0056	27.6247	42.8616
YGR053C	YGR053C	21.4279	31.0769	19.0418	30.6318	29.4972	41.395
YGR054W	YGR054W	303.076	205.853	242.542	153.683	212.159	170.396
YGR055W	MUP1	261.768	764.623	179.513	662.424	209.661	568.126
YGR056W	RSC1	25.5229	28.6845	22.2152	27.2059	28.5052	25.9858
YGR057C	LST7	57.0421	66.7141	78.2768	72.1361	83.6153	80.9851
YGR058W	PEF1	62.5171	57.8736	60.5004	52.9934	57.9211	50.5249
YGR059W	SPR3	20.2789	36.8132	17.0022	50.4063	31.6448	73.8196
YGR060W	ERG25	1278.39	644.469	1117.79	584.678	1008.38	355.757
YGR061C	ADE6	369.788	113.734	169.267	55.6142	113.714	56.4718
YGR062C	COX18	76.3663	56.1691	50.2316	48.6488	55.7653	47.7033
YGR063C	SPT4	1005.3	1129.4	934.24	1112.01	992.497	1372.16
YGR065C	VHT1	75.8433	45.4337	62.5604	42.8723	62.6896	60.4079
YGR066C	YGR066C	6.82109	23.4619	7.58511	91.7768	7.872	11.9069
YGR067C	YGR067C	40.6216	101.473	39.6957	114.512	67.9329	120.783
YGR068C	ART5	18.1296	20.345	16.3457	14.71	16.6463	16.4775
YGR070W	ROM1	1621.18	8307.47	1837.41	17599.4	1958.08	10000.4
YGR071C	ENV11	164.284	131.735	204.893	151.119	243.74	162.303
YGR072W	UPF3	54.0352	42.0472	51.4534	52.7655	85.1033	64.3406
YGR074W	SMD1	628.482	298.757	571.002	297.164	601.157	365.57
YGR075C	PRP38	99.1951	62.1027	84.4949	53.4081	88.117	77.4106
YGR076C	MRPL25	245.105	160.777	180.385	132.995	232.443	223.438
YGR077C	PEX8	83.0141	94.3315	78.9169	86.3596	70.8841	87.2484
YGR078C	PAC10	167.193	98.255	181.806	99.175	120.331	121.043
YGR079W	YGR079W	175.082	168.635	210.138	175.779	205.323	172.551
YGR080W	TWF1	111.914	184.069	106.615	195.742	89.455	153.346
YGR081C	SLX9	243.004	150.893	259.005	177.637	413.242	259.737
YGR082W	TOM20	741.16	300.881	564.173	223.653	460.173	306.531
[truncated: 3,500 more rows]
