# Supplementary material for: Dynamic control of Hsf1 during heat shock by a chaperone switch and phosphorylation
Source: eLife. 2016 Nov 10;5:e18638. doi: 10.7554/eLife.18638 (PMC5127643; doi:10.7554/eLife.18638)
Supplement: Supplemental file 1. — DOI: http://dx.doi.org/10.7554/eLife.18638.023 [file elife-18638-fig1.xlsx]

## Sheet: Sheet1
TABLE S1 - yeast strains
Strain	Genotype	Description	Figure
DPY118	W303 MATa hsf1∆::KAN HSF1pr-HSF1-3xFLAG-V5::TRP1	Hsf1-3xFLAG-V5	1A
DPY144	W303 MATa 4xHSE-YFP::LEU2	HSE-YFP	2A
DPY524	W303 MATa hsf1∆::KAN 4xHSE-YFP::LEU2 GEM::HIS3 GAL1pr-HSF1::TRP1	GAL/estradiol-Hsf1	3A
DPY582	W303 MATa 4xHSE-YFP::LEU2 GEM::URA3 GAL1pr-hNTA-mKate-hCTA::TRP1	Hsf1 decoy	3B
DPY777	W303 MATa 4xHSE-YFP::LEU2 GEM::URA3 GAL1pr-mKate::TRP1	mKate control	3D
DPY591	W303 MATa 4xHSE-YFP::LEU2 GEM::URA3 GAL1pr-∆N-mKate-hCTA::TRP1	∆NTA decoy	S3C
DPY593	W303 MATa 4xHSE-YFP::LEU2 GEM::URA3 GAL1pr-hNTA-mKate-∆C::TRP1	∆CTA decoy	S3C
DPY625	W303 MATa 4xHSE-YFP::LEU2 GEM::URA3 GAL1pr-HSF1::TRP1 ADH1pr-YDJ1::HIS3	GAL-Hsf1 + Hsp40	4B
DPY623	W303 MATa 4xHSE-YFP::LEU2 GEM::URA3 GAL1pr-HSF1::TRP1 TEF1pr-SSA2::HIS3	GAL-Hsf1 + Hsp70	4B
DPY780	W303 MATa 4xHSE-YFP::LEU2 GEM::URA3 GAL1pr-HSF1::TRP1 TDH3pr-HSC82::HIS3	GAL-Hsf1 + Hsp90	4B
DPY781	W303 MATa 4xHSE-YFP::LEU2 GEM::URA3 GAL1pr-HSF1::TRP1 ADH1pr-YDJ1-TEF1pr-SSA2::HIS3	GAL-Hsf1 + Hsp40/70	4B
DPY626	W303 MATa 4xHSE-YFP::LEU2 GEM::URA3 GAL1pr-HSF1::TRP1 TEF1pr-SSA2-TDH3pr-HSC82::HIS3	GAL-Hsf1 + Hsp70/90	4B
DPY628	W303 MATa 4xHSE-YFP::LEU2 GEM::URA3 GAL1pr-HSF1::TRP1 ADH1pr-YDJ1-TEF1pr-SSA2-TDH3pr-HSC82::HIS3	GAL-Hsf1 + Hsp40/70/90	4B
DPY783	W303 MATa 4xHSE-YFP::LEU2 GEM::URA3 GAL1pr-hNTA-mKate-hCTA::TRP1 ADH1pr-YDJ1-TEF1pr-SSA2::HIS3	decoy + Hsp40/70	4C
DPY785	W303 MATa 4xHSE-YFP::LEU2 GEM::URA3 GAL1pr-mKate::TRP1 ADH1pr-YDJ1-TEF1pr-SSA2::HIS3	mKate + Hsp40/70	4C
DPY782	W303 MATa 4xHSE-YFP::LEU2 GEM::URA3 GAL1pr-hNTA-mKate-hCTA::TRP1 TDH3pr-HSC82::HIS3	decoy + Hsp90	4E
DPY784	W303 MATa 4xHSE-YFP::LEU2 GEM::URA3 GAL1pr-mKate::TRP1 TDH3pr-HSC82::HIS3	mKate + Hsp90	4E
DPY778	W303 MATa 4xHSE-YFP::LEU2 GEM::URA3 GAL1pr-DBD(Hsf1)-VP16::TRP1	Hsf1DBD-VP16	S4C
DPY416	W303 MATa hsf1∆::KAN 4xHSE-YFP::LEU2 HSF1pr-HSF1∆po4::TRP1	∆po4	5A
DPY605	W303 MATa hsf1∆::KAN 4xHSE-YFP::LEU2 HSF1pr-HSF1PO4*::TRP1	PO4*	5B
DPY604	W303 MATa hsf1∆::KAN 4xHSE-YFP::LEU2 HSF1pr-HSF1∆po4+33D::TRP1	33D (∆po4)	5H
DPY603	W303 MATa hsf1∆::KAN 4xHSE-YFP::LEU2 HSF1pr-HSF1∆po4+49D::TRP1	49D (∆po4)	5H
DPY602	W303 MATa hsf1∆::KAN 4xHSE-YFP::LEU2 HSF1pr-HSF1∆po4+82D::TRP1	82D (∆po4)	5H
DPY041	W303 MATa hsf1∆::KAN 4xHSE-YFP::LEU2 GEM::HIS3 GAL1pr-HSF1(S450A)::TRP1	450A	S5A
DPY042	W303 MATa hsf1∆::KAN 4xHSE-YFP::LEU2 GEM::HIS3 GAL1pr-HSF1(S450D)::TRP1	450D	S5A
DPY043	W303 MATa hsf1∆::KAN 4xHSE-YFP::LEU2 GEM::HIS3 GAL1pr-HSF1(T460A)::TRP1	460A	S5A
DPY044	W303 MATa hsf1∆::KAN 4xHSE-YFP::LEU2 GEM::HIS3 GAL1pr-HSF1(T460D)::TRP1	460D	S5A
DPY045	W303 MATa hsf1∆::KAN 4xHSE-YFP::LEU2 GEM::HIS3 GAL1pr-HSF1(S471D)::TRP1	471D	S5A
DPY046	W303 MATa hsf1∆::KAN 4xHSE-YFP::LEU2 GEM::HIS3 GAL1pr-HSF1(S545A)::TRP1	545A	S5A
DPY047	W303 MATa hsf1∆::KAN 4xHSE-YFP::LEU2 GEM::HIS3 GAL1pr-HSF1(S545D)::TRP1	545D	S5A
DPY048	W303 MATa hsf1∆::KAN 4xHSE-YFP::LEU2 GEM::HIS3 GAL1pr-HSF1(S546A)::TRP1	546A	S5A
DPY049	W303 MATa hsf1∆::KAN 4xHSE-YFP::LEU2 GEM::HIS3 GAL1pr-HSF1(S546D)::TRP1	546D	S5A
DPY050	W303 MATa hsf1∆::KAN 4xHSE-YFP::LEU2 GEM::HIS3 GAL1pr-HSF1(S454A, S546A)::TRP1	545A,546A	S5A
DPY051	W303 MATa hsf1∆::KAN 4xHSE-YFP::LEU2 GEM::HIS3 GAL1pr-HSF1(S545D, S546D)::TRP1	545D,546D	S5A
DPY052	W303 MATa hsf1∆::KAN 4xHSE-YFP::LEU2 GEM::HIS3 GAL1pr-HSF1(S471A)::TRP1	471A	S5A
DPY057	W303 MATa hsf1∆::KAN 4xHSE-YFP::LEU2 GEM::HIS3 GAL1pr-HSF1(T162A)::TRP1	T162A	S5A
DPY058	W303 MATa hsf1∆::KAN 4xHSE-YFP::LEU2 GEM::HIS3 GAL1pr-HSF1(S50A)::TRP1	50A	S5A
DPY059	W303 MATa hsf1∆::KAN 4xHSE-YFP::LEU2 GEM::HIS3 GAL1pr-HSF1(S249A)::TRP1	249A	S5A
DPY060	W303 MATa hsf1∆::KAN 4xHSE-YFP::LEU2 GEM::HIS3 GAL1pr-HSF1(S528A)::TRP1	528A	S5A
DPY061	W303 MATa hsf1∆::KAN 4xHSE-YFP::LEU2 GEM::HIS3 GAL1pr-HSF1(S568A)::TRP1	568A	S5A
DPY062	W303 MATa hsf1∆::KAN 4xHSE-YFP::LEU2 GEM::HIS3 GAL1pr-HSF1(S608A)::TRP1	608A	S5A
DPY063	W303 MATa hsf1∆::KAN 4xHSE-YFP::LEU2 GEM::HIS3 GAL1pr-HSF1(S702A)::TRP1	702A	S5A
DPY064	W303 MATa hsf1∆::KAN 4xHSE-YFP::LEU2 GEM::HIS3 GAL1pr-HSF1(S705A)::TRP1	705A	S5A
DPY065	W303 MATa hsf1∆::KAN 4xHSE-YFP::LEU2 GEM::HIS3 GAL1pr-HSF1(S764A)::TRP1	764A	S5A
DPY066	W303 MATa hsf1∆::KAN 4xHSE-YFP::LEU2 GEM::HIS3 GAL1pr-HSF1(T163A)::TRP1	163A	S5A
DPY067	W303 MATa hsf1∆::KAN 4xHSE-YFP::LEU2 GEM::HIS3 GAL1pr-HSF1(T204A)::TRP1	204A	S5A
DPY068	W303 MATa hsf1∆::KAN 4xHSE-YFP::LEU2 GEM::HIS3 GAL1pr-HSF1(T586A)::TRP1	586A	S5A
DPY069	W303 MATa hsf1∆::KAN 4xHSE-YFP::LEU2 GEM::HIS3 GAL1pr-HSF1(T487A)::TRP1	487A	S5A
DPY070	W303 MATa hsf1∆::KAN 4xHSE-YFP::LEU2 GEM::HIS3 GAL1pr-HSF1(S168A)::TRP1	168A	S5A
DPY071	W303 MATa hsf1∆::KAN 4xHSE-YFP::LEU2 GEM::HIS3 GAL1pr-HSF1(S72A)::TRP1	72A	S5A
DPY072	W303 MATa hsf1∆::KAN 4xHSE-YFP::LEU2 GEM::HIS3 GAL1pr-HSF1(S458A)::TRP1	458A	S5A
DPY073	W303 MATa hsf1∆::KAN 4xHSE-YFP::LEU2 GEM::HIS3 GAL1pr-HSF1(T441A)::TRP1	441A	S5A
DPY074	W303 MATa hsf1∆::KAN 4xHSE-YFP::LEU2 GEM::HIS3 GAL1pr-HSF1(S770A)::TRP1	770A	S5A
DPY075	W303 MATa hsf1∆::KAN 4xHSE-YFP::LEU2 GEM::HIS3 GAL1pr-HSF1(S760A)::TRP1	760A	S5A
DPY076	W303 MATa hsf1∆::KAN 4xHSE-YFP::LEU2 GEM::HIS3 GAL1pr-HSF1(S87A)::TRP1	87A	S5A
DPY089	W303 MATa hsf1∆::KAN 4xHSE-YFP::LEU2 GEM::HIS3 GAL1pr-HSF1(S783A)::TRP1	783A	S5A
DPY090	W303 MATa hsf1∆::KAN 4xHSE-YFP::LEU2 GEM::HIS3 GAL1pr-HSF1(T439A)::TRP1	439A	S5A
DPY091	W303 MATa hsf1∆::KAN 4xHSE-YFP::LEU2 GEM::HIS3 GAL1pr-HSF1(S471A, T439A)::TRP1	471A,439A	S5A
DPY093	W303 MATa hsf1∆::KAN 4xHSE-YFP::LEU2 GEM::HIS3 GAL1pr-HSF1(S26A)::TRP1	26A	S5A
DPY094	W303 MATa hsf1∆::KAN 4xHSE-YFP::LEU2 GEM::HIS3 GAL1pr-HSF1(S662A)::TRP1	662A	S5A
DPY095	W303 MATa hsf1∆::KAN 4xHSE-YFP::LEU2 GEM::HIS3 GAL1pr-HSF1(S471A, T439A, S450A)::TRP1	471A,439A,450A	S5A
DPY119	W303 MATa hsf1∆::KAN 4xHSE-YFP::LEU2 GEM::HIS3 GAL1pr-HSF1(S655A)::TRP1	655A	S5A
DPY120	W303 MATa hsf1∆::KAN 4xHSE-YFP::LEU2 GEM::HIS3 GAL1pr-HSF1(S545A, S546A, T547A, S548A, S549A)::TRP1	545A,546A,547A,548A,549A	S5A
DPY123	W303 MATa hsf1∆::KAN 4xHSE-YFP::LEU2 GEM::HIS3 GAL1pr-HSF1(S471A, T439A, S450A, S458A, T460A)::TRP1	471A,439A,450A,458A,460A	S5A
DPY134	W303 MATa hsf1∆::KAN 4xHSE-YFP::LEU2 GEM::HIS3 GAL1pr-HSF1(S471A, T439A, S450A, S458A, T460A, S655A)::TRP1	471A,439A,450A,458A,460A,655A	S5A
DPY135	W303 MATa hsf1∆::KAN 4xHSE-YFP::LEU2 GEM::HIS3 GAL1pr-HSF1(S545A, S546A, T547A, S548A, S549A, S655A)::TRP1	545A,546A,547A,548A,549A,655A	S5A
DPY137	W303 MATa hsf1∆::KAN 4xHSE-YFP::LEU2 GEM::HIS3 GAL1pr-HSF1(S221A)::TRP1	221A	S5A
DPY138	W303 MATa hsf1∆::KAN 4xHSE-YFP::LEU2 GEM::HIS3 GAL1pr-HSF1(S151D, S152D)::TRP1	151D,152D	S5A
DPY139	W303 MATa hsf1∆::KAN 4xHSE-YFP::LEU2 GEM::HIS3 GAL1pr-HSF1(T115A)::TRP1	115A	S5A
DPY140	W303 MATa hsf1∆::KAN 4xHSE-YFP::LEU2 GEM::HIS3 GAL1pr-HSF1(T594D, S595D)::TRP1	594D,595D	S5A
DPY158	W303 MATa hsf1∆::KAN 4xHSE-YFP::LEU2 GEM::HIS3 GAL1pr-HSF1(S200A)::TRP1	200A	S5A
DPY159	W303 MATa hsf1∆::KAN 4xHSE-YFP::LEU2 GEM::HIS3 GAL1pr-HSF1(S171A)::TRP1	171A	S5A
DPY160	W303 MATa hsf1∆::KAN 4xHSE-YFP::LEU2 GEM::HIS3 GAL1pr-HSF1(S151A, S152A)::TRP1	151A,152A	S5A
DPY161	W303 MATa hsf1∆::KAN 4xHSE-YFP::LEU2 GEM::HIS3 GAL1pr-HSF1(S662A, S655A)::TRP1	655A,662A	S5A
DPY162	W303 MATa hsf1∆::KAN 4xHSE-YFP::LEU2 GEM::HIS3 GAL1pr-HSF1(T115D)::TRP1	115D	S5A
DPY212	W303 MATa hsf1∆::KAN 4xHSE-YFP::LEU2 GEM::HIS3 GAL1pr-HSF1(T115A, S119A)::TRP1	115A,119A	S5A
DPY213	W303 MATa hsf1∆::KAN 4xHSE-YFP::LEU2 GEM::HIS3 GAL1pr-HSF1(T115D, S119D)::TRP1	115D,119D	S5A
DPY214	W303 MATa hsf1∆::KAN 4xHSE-YFP::LEU2 GEM::HIS3 GAL1pr-HSF1(T594A, S595A)::TRP1	594A,595A	S5A
DPY583	W303 MATa 4xHSE-YFP::LEU2 GEM::URA3 GAL1pr-∆po4NTA-mKate-∆po4CTA::TRP1	∆po4 decoy	6A
DPY633	W303 MATa 4xHSE-YFP::LEU2 GEM::URA3 GAL1pr-PO4*NTA-mKate-PO4*CTA::TRP1	PO4* decoy	6A
DPY697	W303 MATa hsf1∆::KAN 4xHSE-YFP::LEU2 GEM::HIS3 GAL1pr-HSF1-mKate::TRP1	GAL-Hsf1-mKate	6C
DPY698	W303 MATa hsf1∆::KAN 4xHSE-YFP::LEU2 GEM::HIS3 GAL1pr-HSF1∆po4-mKate::TRP1	GAL-Hsf1∆po4-mKate	6C
DPY699	W303 MATa hsf1∆::KAN 4xHSE-YFP::LEU2 GEM::HIS3 GAL1pr-HSF1PO4*-mKate::TRP1	GAL-Hsf1PO4*-mKate	6C
DPY726	W303 MATa hsf1∆::KAN 4xHSE-YFP::LEU2 HSF1pr-HSF1::TRP1 MED4-3xFLAG-V5::HIS3	Med4-3xFLAG-V5 WT	6F
DPY727	W303 MATa hsf1∆::KAN 4xHSE-YFP::LEU2 HSF1pr-HSF1∆po4::TRP1 MED4-3xFLAG-V5::HIS3	Med4-3xFLAG-V5 ∆po4	6F
DPY728	W303 MATa hsf1∆::KAN 4xHSE-YFP::LEU2 HSF1pr-HSF1PO4*::TRP1 MED4-3xFLAG-V5::HIS3	Med4-3xFLAG-V5 PO4*	6F
