# Supplementary material for: Dynamic control of Hsf1 during heat shock by a chaperone switch and phosphorylation
Source: eLife. 2016 Nov 10;5:e18638. doi: 10.7554/eLife.18638 (PMC5127643; doi:10.7554/eLife.18638)
Supplement: Supplemental file 2. — DOI: http://dx.doi.org/10.7554/eLife.18638.024 [file elife-18638-fig2.xlsx]

## Sheet: plasmids
TABLE S2 - plasmids
Plasmid	Details	Description	Figure
pDP032	pRS316-HSF1	CEN/ARS, HSF1	1
pDP082	pNH604-HSF1pr-HSF1-3xFLAG-V5	single integration, Hsf1-3xFLAG-V5	1
pDP068	pET32b-HSF1-6xHIS	E. coli expression vector for Hsf1	1
pDP741	pET32b-6xHIS-3xFLAG-SSA2	E. coli expression vector for Ssa2	1
pDP122	pNH605-4xHSEpr-YFP	HSE-YFP reporter	2
pDP030	pRS303-GEM	estradiol receptor: Gal4(DBD)-ER-Msn2(AD)	3
pDP042	pNH604-GAL1pr-HSF1	GAL-WT HSF1	3
pDP585	pNH604-GAL1pr-hNTA-mKate-hCTA	WT Hsf1 decoy	3
pDP742	pNH604-GAL1pr-mKate2	GAL-mKate control	3
pDP722	pRS425-mCherry-Ubc9ts	Ubc9 aggregation reporter	3
pDP620	pNH603-TEF1pr-SSA2	Hsp70	4
pDP621	pNH603-ADH1pr-YDJ1	Hsp40	4
pDP622	pNH603-TDH3pr-HSC82	Hsp90	4
pDP743	pNH603-ADH1pr-YDJ1-TEF1pr-SSA2	Hsp40 + Hsp70	4
pDP744	pNH603-TEF1pr-SSA2-TDH3pr-HSC82	Hsp70 + Hsp90	4
pDP745	pNH603-ADH1pr-YDJ1-TEF1pr-SSA2-TDH3pr-HSC82	Hsp40 + Hsp70 +Hsp90	4
pDP746	pNH604-GAL1pr-DBD(HSF1)-VP16	Hsf1 DBD fused to VP16 AD	S4
pDP315	pNH604-HSF1pr-HSF1∆po4	Hsf1∆po4	5
pDP674	pNH604-HSF1pr-HSF1PO4*	Hsf1PO4*	5
pDP669	pNH604-HSF1pr-HSF1∆po4-82D	Hsf1∆po4-82D	5
pDP670	pNH604-HSF1pr-HSF1∆po4-49D	Hsf1∆po4-49D	5
pDP671	pNH604-HSF1pr-HSF1∆po4-33D	Hsf1∆po4-33D	5
pDP043	pNH604-GAL1pr-HSF1(S450D)	S450D	S5
pDP044	pNH604-GAL1pr-HSF1(T460A)	T460A	S5
pDP045	pNH604-GAL1pr-HSF1(T460D)	T460D	S5
pDP046	pNH604-GAL1pr-HSF1(S545D)	S545D	S5
pDP047	pNH604-GAL1pr-HSF1(S546D)	S546D	S5
pDP048	pNH604-GAL1pr-HSF1(S450A)	S450A	S5
pDP049	pNH604-GAL1pr-HSF1(S545A)	S545A	S5
pDP050	pNH604-GAL1pr-HSF1(S546A)	S546A	S5
pDP051	pNH604-GAL1pr-HSF1(S471D)	S471D	S5
pDP052	pNH604-GAL1pr-HSF1(S545A, S546A)	S545A,S546A	S5
pDP053	pNH604-GAL1pr-HSF1(S545D, S546D)	S545D,S546D	S5
pDP054	pNH604-GAL1pr-HSF1(S471A)	S471A	S5
pDP055	pNH604-GAL1pr-HSF1(S168A)	S168A	S5
pDP056	pNH604-GAL1pr-HSF1(T162A)	T162A	S5
pDP057	pNH604-GAL1pr-HSF1(S50A)	S50A	S5
pDP058	pNH604-GAL1pr-HSF1(S249A)	S249A	S5
pDP059	pNH604-GAL1pr-HSF1(S528A)	S528A	S5
pDP060	pNH604-GAL1pr-HSF1(S568A)	S568A	S5
pDP061	pNH604-GAL1pr-HSF1(S608A)	S608A	S5
pDP062	pNH604-GAL1pr-HSF1(S702A)	S702A	S5
pDP063	pNH604-GAL1pr-HSF1(S705A)	S705A	S5
pDP064	pNH604-GAL1pr-HSF1(S764A)	S764A	S5
pDP065	pNH604-GAL1pr-HSF1(T163A)	T163A	S5
pDP066	pNH604-GAL1pr-HSF1(T204A)	T204A	S5
pDP067	pNH604-GAL1pr-HSF1(T487A)	T487A	S5
pDP069	pNH604-GAL1pr-HSF1(T586A)	T586A	S5
pDP070	pNH604-GAL1pr-HSF1(T441A)	T441A	S5
pDP072	pNH604-GAL1pr-HSF1(S72A)	S72A	S5
pDP073	pNH604-GAL1pr-HSF1(S458A)	S458A	S5
pDP074	pNH604-GAL1pr-HSF1(S770A)	S770	S5
pDP075	pNH604-GAL1pr-HSF1(S760A)	S760A	S5
pDP076	pNH604-GAL1pr-HSF1(S87A)	S87A	S5
pDP078	pNH604-GAL1pr-HSF1(1-424)	GAL ∆CTA	S5
pDP080	pNH604-GAL1pr-HSF1(147-833)	GAL ∆NTA	S5
pDP096	pNH604-GALpr-HSF1(S783A)	S783A	S5
pDP097	pNH604-GALpr-HSF1(T439A)	T439A	S5
pDP098	pNH604-GALpr-HSF1(S471A,T439A)	S471A,T439A	S5
pDP101	pNH604-GALpr-HSF1(S26A)	S26A	S5
pDP102	pNH604-GALpr-HSF1(S662A)	S662A	S5
pDP103	pNH604-GALpr-HSF1(S471A,T439A,S450A)	S471A,T439A,S450A	S5
pDP108	pNH604-GALpr-HSF1(S471A,T439A,S450A,S458A,T460A)	S471A,T439A,S450A,S458A,T460A	S5
pDP109	pNH604-GALpr-HSF1(S655A)	S655A	S5
pDP110	pNH604-GALpr-HSF1(S545A,S546A,T547A,S548A,S549A)	S545A, S546A, T547A, S548A, S549A	S5
pDP142	pNH604-GAL1pr-HSF1(T439A,S450A,S458A,T460A,S655A,S471A)	T439A,S450A,S458A,T460A,S655A,S471A	S5
pDP146	pNH604-GALpr-HSF1(S545A,S546A,T547A,S548A,S549A, S655A)	S545A,S546A,T547A,S548A,S549A, S655A	S5
pDP147	pNH604-GAL1pr-HSF1(S221A)	S221A	S5
pDP148	pNH604-GAL1pr-HSF1(S151D, S152D)	S151D, S152D	S5
pDP149	pNH604-GAL1pr-HSF1(T594D, S595D)	T594D, S595A	S5
pDP150	pNH604-GAL1pr-HSF1(T115A)	T115A	S5
pDP151	pNH604-GAL1pr-HSF1(S151A, S152A)	S151A, S152A	S5
pDP152	pNH604-GAL1pr-HSF1(S200A)	S200A	S5
pDP153	pNH604-GAL1pr-HSF1(S171A)	S171A	S5
pDP154	pNH604-GAL1pr-HSF1(T115D)	T115D	S5
pDP155	pNH604-GAL1pr-HSF1(S655A, S662A)	S655A,S662A	S5
pDP170	pNH604-GAL1pr-HSF1(T115A,S119A)	T115A, S119A	S5
pDP171	pNH604-GAL1pr-HSF1(T115D,S119D)	T115D, S119D	S5
pDP172	pNH604-GAL1pr-HSF1(T594A, S595A)	T594A, S595A	S5
pDP317	pNH604-HSF1pr-HSF1(S225A)	S225A	S5
pDP410	pET32b-HSF1(S225A)-6xHIS	E. coli expression vector for Hsf1(S225A)	S5
pDP433	pET32b-HSF1(S225D)-6xHIS	E. coli expression vector for Hsf1(S225D)	S5
pDP587	pNH604-GAL1pr-HSF1-∆po4NTA-mKate-∆po4CTA	∆po4 decoy	6
pDP696	pNH604-GAL1pr-HSF1-PO4*NTA-mKate-PO4*4CTA	PO4* decoy	6
pDP721	pNH604-GAL1pr-HSF1-mKate	GAL-HSF1-mKate	6
pDP726	pNH604-GAL1pr-HSF1∆po4-mKate	GAL-∆po4-mKate	6
pDP727	pNH604-GAL1pr-HSF1PO4*-mKate	GAL-PO4*-mKate	6
pDP616	pFA6a-3xFLAG-V5-CaURA3	3xFLAG-V5 genomic tagging	6
